# Supplementary material for: Genome-wide survey of remote homologues for protein domain superfamilies of known structure reveals unequal distribution across structural classes
Source: Royal Society of Chemistry journal article supplement (doi:10.1039/c8mo00008e), 2018-06-27
Supplement: c8mo00008e1.pdf [file c8mo00008e1.pdf]

## Genome-wide survey of remote homologues for protein domain superfamilies of known structure reveals unequal distribution across structural classes

Meenakshi S. Iyer, Adwait Joshi and Ramanathan Sowdhamini\*

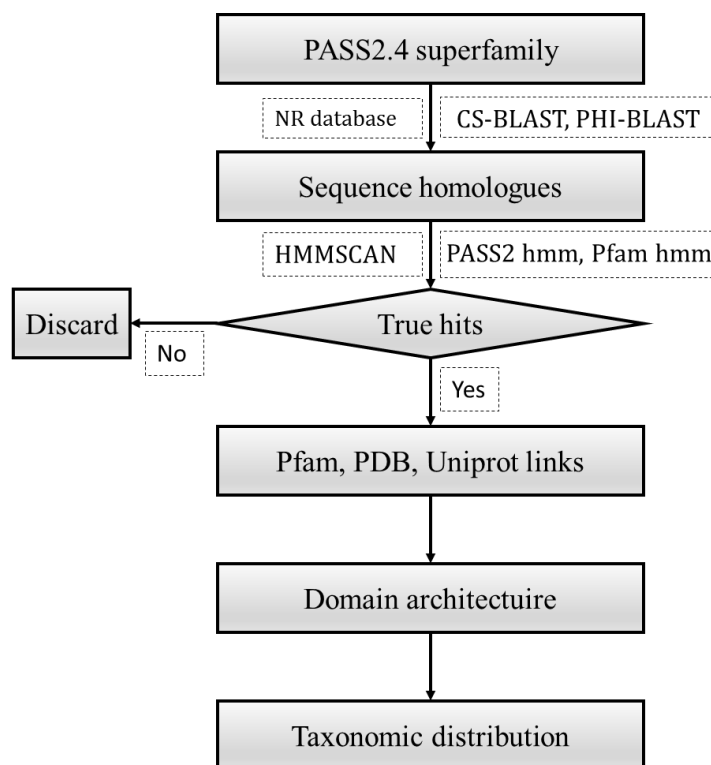

**Supplementary Figure 1:** The work-flow followed in the paper has been illustrated. Each hit identified by sequence searches undergoes the following steps- validation using superfamily HMMs, DA determination at SCOP and Pfam level, finding the taxonomic occurrence.

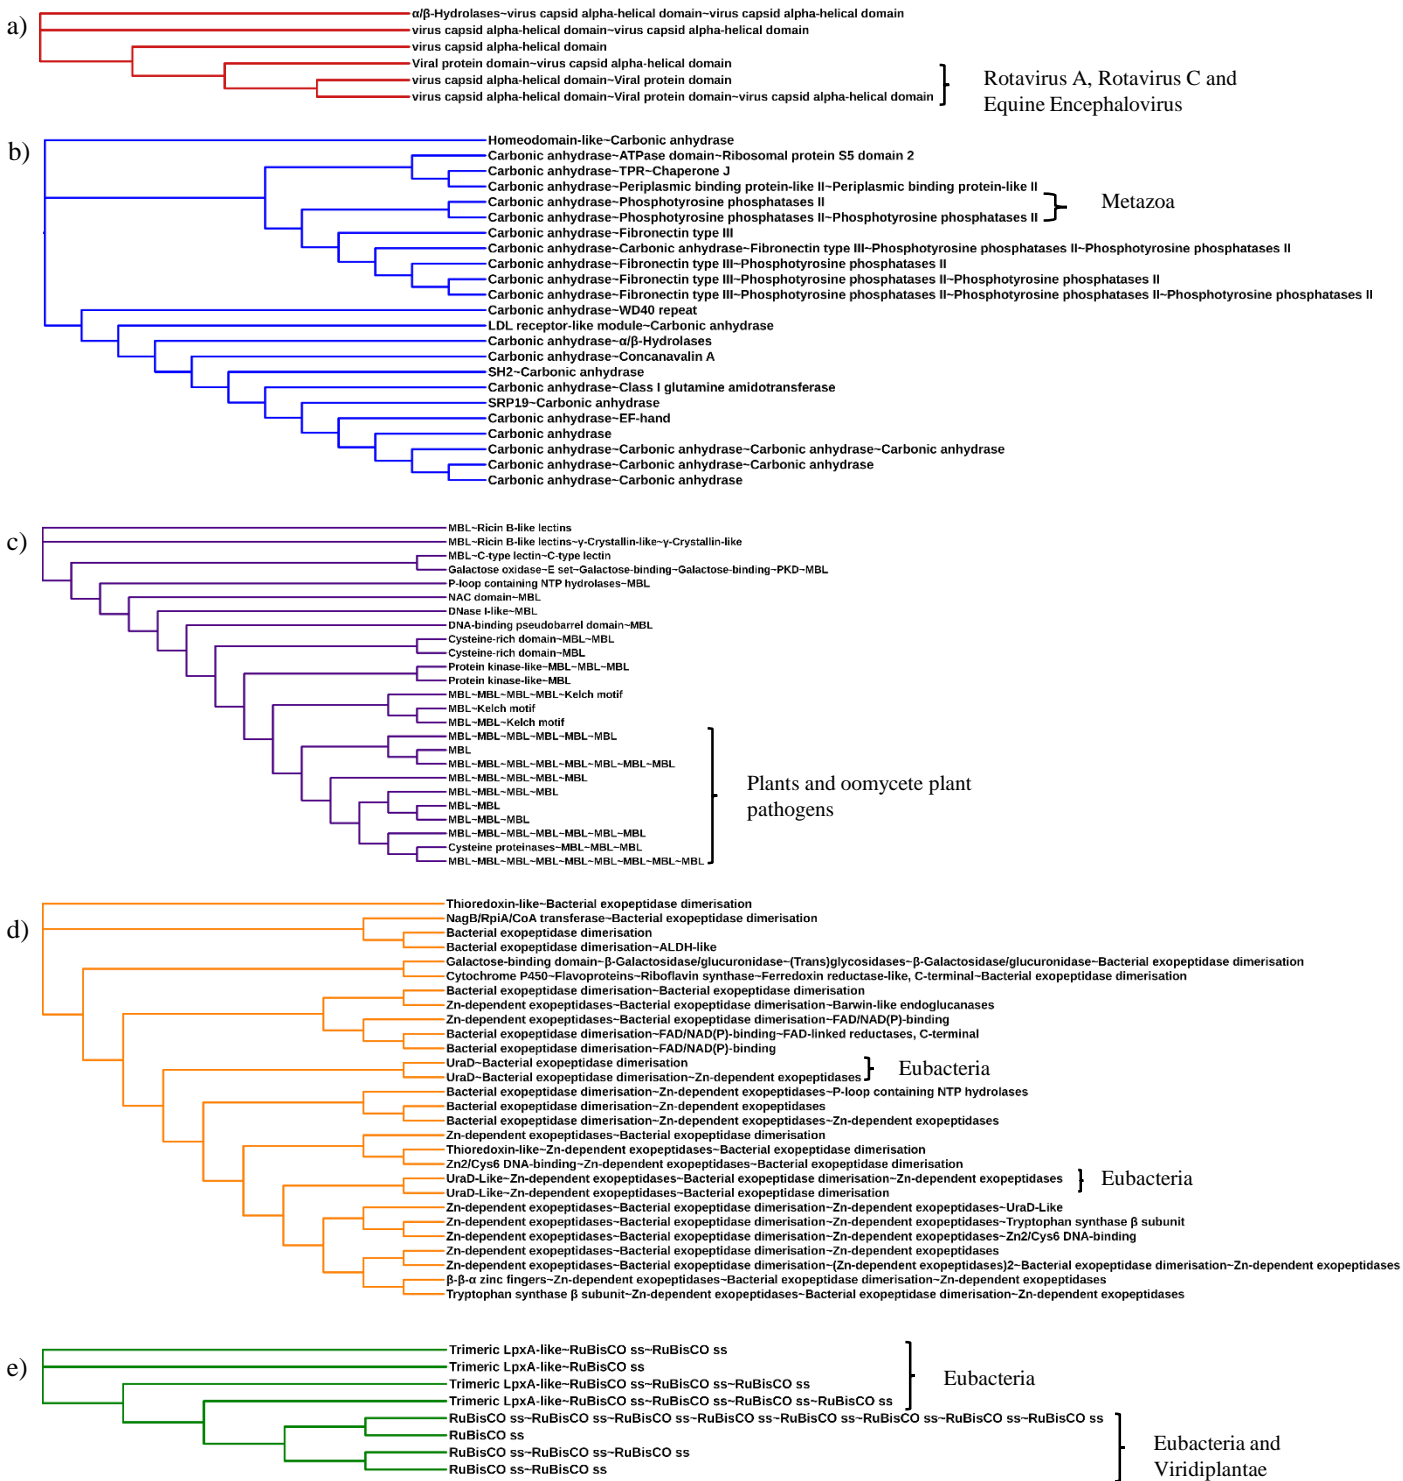

**Supplementary Figure 2:** The phylogenetic trees obtained using the DA for the superfamilies a) 48345 (red) b) 55239 (green) c) 51069 (blue) d) 51101 (purple) e) 55031 (orange) are shown. We see that that similar DA like domain repeats (51101) and same pair of domains associated with other domains (55239 and 51161) are clustered and unrelated domains are well-separated. The taxonomic distribution of the different DA is indicated.

**Supplementary Table 1:** The HMM library was created using all the PASS2.4 member sequences and the superfamily alignments. PASS2.4 is divided into different categories based on the number of PASS2.4 members in the superfamily into Single-membered (SMS), Two-membered (TMS) and multi-membered superfamilies (MMS). PASS2.4 also provides structure-based sequence alignments for all the superfamilies. Since, SMS have only a single member, the SF-HMM is a single sequence HMM. There were in total 1080 SF-HMMs and 10569 SQ-HMMs, 11649 total HMMs. We used the superfamily alignments and the member sequences to create a HMM library with a total of 11,749 HMMs. SF-HMM – PASS2.4 superfamily alignment HMM, SQ-HMM – Single query HMM.

| <b>Type of HMM library</b> | <b>Number of SMS HMM</b> | <b>Number of TMS HMM</b> | <b>Number of MMS HMM</b> | <b>Total</b> |
|----------------------------|--------------------------|--------------------------|--------------------------|--------------|
| SF-HMM                     | -                        | 366                      | 714                      | 1180         |
| SQ-HMM                     | 864                      | 732                      | 8973                     | 10,569       |
| Total                      | 864                      | 1098                     | 9687                     | 11,749       |

**Supplementary Table 2: Number of sequence search (PHI-BLAST and CS-BLAST) and validation**

(HMMSCAN) runs carried out in the study.

| <b>Sequence search method</b> | <b>Number of runs in SMS</b> | <b>Number of runs in TMS</b> | <b>Number of runs in MMS</b> | <b>Total</b> |
|-------------------------------|------------------------------|------------------------------|------------------------------|--------------|
| CS-BLAST                      | 864                          | 732                          | 8,970                        | 10,566       |
| PHI-BLAST                     | 4,425                        | 4,405                        | 4,662                        | 13,492       |
| Total                         | 5,289                        | 5,137                        | 13,632                       | 24, 058      |

| <b>Sequence search method</b> | <b>HMM library</b> | <b>Number of runs in SMS</b> | <b>Number of runs in TMS</b> | <b>Number of runs in MMS</b> | <b>Total</b> |
|-------------------------------|--------------------|------------------------------|------------------------------|------------------------------|--------------|
| CS-BLAST                      | PASS2.4 HMM        | 847                          | 363                          | 730                          | 1,940        |
|                               | Pfam HMM           | 847                          | 363                          | 730                          | 1,940        |
| PHI-BLAST                     | PASS2.4 HMM        | 686                          | 338                          | 697                          | 1,721        |
|                               | Pfam HMM           | 686                          | 338                          | 697                          | 1,721        |
| Total                         | Total              | 3,066                        | 1,402                        | 2,854                        | 7,322        |

**Supplementary Table 3:** The comparison of the MP and MQ approach for the superfamily test dataset. MQ approach picks up more hits whereas the MP approach has a better Positive Prediction Value (PPV). MP- Multi-Pattern, MQ- Multi-Query, TP- True Positive, FP- False positive

| SCOP Superfamily | Superfamily description                     | Total | TP_total | FP_total | Total PPV | MP_total | MP_TP | MP_FP | MP PPV | MQ_total | MQ_TP | MQ_FP | MQ PPV |
|------------------|---------------------------------------------|-------|----------|----------|-----------|----------|-------|-------|--------|----------|-------|-------|--------|
| 47336            | ACP-like                                    | 24330 | 21394    | 2936     | 0.88      | 2125     | 2114  | 11    | 0.99   | 23883    | 20949 | 2934  | 0.88   |
| 47565            | Insect Pheromone-OBPs                       | 2549  | 2306     | 243      | 0.91      | 707      | 698   | 9     | 0.99   | 2548     | 2306  | 242   | 0.91   |
| 48345            | A virus capsid protein alpha helical domain | 1693  | 1055     | 638      | 0.62      | 785      | 755   | 30    | 0.96   | 1692     | 1055  | 637   | 0.62   |
| 50203            | Bacterial Enterotoxins                      | 2908  | 2633     | 275      | 0.91      | 764      | 678   | 86    | 0.89   | 2900     | 2633  | 267   | 0.91   |
| 51101            | Carbonic anhydrase                          | 3121  | 1790     | 1331     | 0.57      | 673      | 658   | 15    | 0.98   | 3120     | 1790  | 1330  | 0.57   |
| 51069            | Mannose-binding lectins                     | 7563  | 7464     | 99       | 0.99      | 777      | 777   | 0     | 1      | 7561     | 7464  | 97    | 0.99   |
| 55031            | Triosephosphate isomerase                   | 32235 | 25309    | 6926     | 0.79      | 570      | 439   | 131   | 0.77   | 32084    | 25204 | 6880  | 0.79   |
| 55239            | Bacterial-luciferase like                   | 2642  | 1944     | 698      | 0.74      | 694      | 570   | 124   | 0.82   | 2641     | 1944  | 697   | 0.74   |
| 55307            | Nucleotide-binding domain                   | 15953 | 15815    | 138      | 0.99      | 3323     | 3315  | 8     | 0.99   | 15582    | 15454 | 128   | 0.99   |
| 51351            |                                             | 7599  | 7568     | 31       | 0.99      | 562      | 552   | 10    | 0.98   | 7052     | 7032  | 20    | 0.99   |
| 51679            | Bacterial exopeptidase dimerisation         | 24813 | 22089    | 2724     | 0.89      | 1880     | 1724  | 156   | 0.92   | 24391    | 21794 | 2597  | 0.89   |
| 51971            | RuBisCo-small subunit                       | 29134 | 12631    | 16503    | 0.43      | 2393     | 1449  | 944   | 0.61   | 27608    | 11616 | 15992 | 0.42   |

**Supplementary Table 4:** The number of hits obtained for each superfamily using the different sequence search approaches has been provided with the taxonomic distribution. The SCOP class and fold code have also been provided. The numbers indicate the number of true positive hits for the different taxa.

| CLASS | FOLD   | SF    | SUPERFAMILY DESCRIPTION                                                                | CSBLAST HITS | PHBLAST HITS | CSBLAST TP HITS | PHBLAST TP LIST | PHBLAST PDB COUNT | CSBLAST PDB COUNT | ALL PDB COUNT | PFAM UNIQUE DA | PASS UNIQUE DA | TAXID | CELLULAR ORGANISMS | VIRUS | UNCHARACTERISED | ENVIRONMENTAL SAMPLE | BACTERIA | ARCHAEA | PLANT | METAZOA | PROTOKBACTERIA | ACTINOBACTERIA | FRAMICUTES | SAR | FUNGI |
|-------|--------|-------|----------------------------------------------------------------------------------------|--------------|--------------|-----------------|-----------------|-------------------|-------------------|---------------|----------------|----------------|-------|--------------------|-------|-----------------|----------------------|----------|---------|-------|---------|----------------|----------------|------------|-----|-------|
| 46456 | 46457  | 46458 | Globin-like                                                                            | 26176        | 1603         | 22203           | 1479            | 995               | 2824              | 2824          | 131            | 59             | 6399  | 6394               | 0     | 12              | 19                   | 4787     | 87      | 111   | 980     | 2324           | 1180           | 688        | 33  | 294   |
| 46456 | 46457  | 46458 | alpha-helical ferredoxin                                                               | 10853        | 529          | 6154            | 529             | 20                | 114               | 114           | 43             | 39             | 3910  | 3909               | 0     | 17              | 19                   | 2957     | 107     | 72    | 313     | 2229           | 628            | 13         | 59  | 336   |
| 46456 | 46556  | 46557 | GreA transcript cleavage protein, N-terminal domain                                    | 5583         | 2634         | 5581            | 2626            | 19                | 1                 | 19            | 4              | 6              | 4638  | 4637               | 0     | 10              | 148                  | 4630     | 0       | 0     | 4       | 2383           | 637            | 955        | 0   | 0     |
| 46456 | 46556  | 46561 | Ribosomal protein L29 (L29p)                                                           | 4925         | 1096         | 4901            | 1094            | 76                | 395               | 395           | 6              | 8              | 4204  | 4202               | 0     | 14              | 200                  | 3590     | 195     | 52    | 156     | 1520           | 725            | 983        | 21  | 169   |
| 46456 | 46556  | 46565 | Chaperone J-domain                                                                     | 28754        | 813          | 27587           | 749             | 5                 | 56                | 57            | 292            | 159            | 8737  | 8631               | 104   | 62              | 366                  | 7455     | 158     | 88    | 324     | 2838           | 1226           | 1601       | 88  | 464   |
| 46456 | 116730 | 46575 | DNA polymerase III theta subunit-like                                                  | 770          | 651          | 693             | 0               | 7                 | 7                 | 7             | 2              | 4              | 273   | 270                | 3     | 0               | 0                    | 268      | 0       | 0     | 1       | 268            | 0              | 0          | 0   | 1     |
| 46456 | 46556  | 46579 | PreRdm                                                                                 | 5353         | 1916         | 6033            | 769             | 7                 | 2                 | 7             | 13             | 9              | 883   | 880                | 0     | 44              | 52                   | 5        | 376     | 62    | 202     | 0              | 0              | 0          | 39  | 176   |
| 46456 | 46556  | 46585 | HRI repeat                                                                             | 3464         | 871          | 1330            | 849             | 5                 | 3                 | 5             | 34             | 22             | 302   | 301                | 0     | 0               | 0                    | 0        | 0       | 1     | 264     | 0              | 0              | 0          | 0   | 36    |
| 46456 | 46556  | 46589 | RNA-binding arm                                                                        | 16027        | 1093         | 8453            | 1066            | 10                | 30                | 32            | 9              | 20             | 4232  | 4229               | 0     | 9               | 142                  | 4173     | 50      | 3     | 3       | 2155           | 162            | 1495       | 0   | 0     |
| 46456 | 46556  | 46596 | Eukaryotic DNA topoisomerase I, dispensable insert domain                              | 1122         | 965          | 472             | 3               | 15                | 15                | 15            | 6              | 9              | 437   | 437                | 0     | 0               | 0                    | 0        | 0       | 0     | 0       | 437            | 0              | 0          | 0   | 0     |
| 46456 | 46556  | 46600 | C-terminal Uvc-binding domain of UvrB                                                  | 5000         | 783          | 2999            | 782             | 4                 | 2                 | 4             | 5              | 9              | 1606  | 1606               | 0     | 3               | 33                   | 1604     | 0       | 0     | 1       | 1359           | 3              | 167        | 0   | 1     |
| 46456 | 46556  | 46604 | Epsilon subunit of F1F0-ATP synthase C-terminal domain                                 | 842          | 1357         | 834             | 956             | 22                | 22                | 22            | 3              | 7              | 795   | 794                | 0     | 4               | 4                    | 595      | 0       | 0     | 0       | 198            | 589            | 1          | 1   | 0     |
| 46456 | 46556  | 46609 | Fe/Mn superoxide dismutase (SOD), N-terminal domain                                    | 10292        | 1690         | 10284           | 1671            | 17                | 222               | 227           | 25             | 20             | 6270  | 6266               | 1     | 36              | 76                   | 5223     | 192     | 145   | 344     | 2497           | 654            | 966        | 48  | 292   |
| 46456 | 46625  | 46626 | Cytochrome c                                                                           | 61639        | 1032         | 37802           | 905             | 7                 | 729               | 729           | 287            | 77             | 6394  | 6388               | 0     | 46              | 67                   | 5356     | 9       | 109   | 360     | 3840           | 36             | 437        | 111 | 376   |
| 46456 | 46688  | 46689 | Homeodomain-like                                                                       | 215768       | 1504         | 176340          | 1502            | 2                 | 734               | 736           | 7              | 398            | 11984 | 11949              | 6     | 40              | 276                  | 10012    | 86      | 40    | 780     | 4883           | 1761           | 2161       | 90  | 533   |
| 46456 | 46688  | 46767 | Methylated DNA-protein cysteine methyltransferase, C-terminal domain                   | 7467         | 2602         | 7467            | 2590            | 10                | 4                 | 12            | 26             | 32             | 3914  | 3912               | 1     | 8               | 93                   | 3757     | 106     | 2     | 17      | 2061           | 492            | 740        | 0   | 29    |
| 46456 | 46688  | 46774 | ARID-like                                                                              | 5801         | 639          | 5584            | 639             | 5                 | 18                | 18            | 83             | 33             | 743   | 742                | 0     | 0               | 0                    | 0        | 0       | 63    | 276     | 0              | 0              | 0          | 5   | 388   |
| 46456 | 46688  | 46785 | Winged helix DNA-binding domain                                                        | 427550       | 674          | 282586          | 674             | 12                | 1550              | 1550          | 6              | 403            | 15596 | 15484              | 57    | 164             | 541                  | 13379    | 463     | 284   | 628     | 5891           | 1992           | 3244       | 98  | 570   |
| 46456 | 46688  | 46894 | C-terminal effector domain of the bipartite response regulators                        | 67583        | 674          | 61405           | 668             | 3                 | 111               | 111           | 400            | 111            | 8764  | 8754               | 0     | 29              | 333                  | 8734     | 2       | 2     | 10      | 3578           | 1845           | 2285       | 1   | 2     |
| 46456 | 46688  | 46906 | Ribosomal protein L11, C-terminal domain                                               | 5554         | 2067         | 5546            | 2060            | 135               | 226               | 273           | 7              | 10             | 4752  | 4749               | 0     | 29              | 230                  | 4415     | 223     | 66    | 3       | 1388           | 777            | 1113       | 26  | 0     |
| 46456 | 46688  | 46911 | Ribosomal protein S18                                                                  | 5000         | 1429         | 4960            | 71              | 272               | 382               | 382           | 3              | 9              | 4160  | 4159               | 0     | 11              | 222                  | 4041     | 0       | 75    | 0       | 1282           | 681            | 1016       | 24  | 6     |
| 46456 | 46688  | 46915 | Polynucleotide phosphorylase/guanosine pentaphosphate synthase (PNPase/GPSI), domain 3 | 6973         | 2330         | 4709            | 72              | 7                 | 26                | 26            | 41             | 45             | 3165  | 3165               | 0     | 6               | 87                   | 2871     | 0       | 54    | 240     | 1228           | 1097           | 344        | 0   | 0     |
| 46456 | 46688  | 46919 | N-terminal Zn binding domain of HIV integrase                                          | 5000         | 1686         | 5000            | 1676            | 12                | 0                 | 12            | 30             | 38             | 37    | 0                  | 33    | 0               | 0                    | 0        | 0       | 0     | 0       | 0              | 0              | 0          | 0   | 0     |
| 46456 | 46688  | 46924 | RNA polymerase subunit RPB10                                                           | 857          | 606          | 850             | 597             | 126               | 127               | 127           | 3              | 6              | 749   | 738                | 8     | 28              | 35                   | 1        | 281     | 65    | 80      | 1              | 0              | 0          | 37  | 235   |
| 46456 | 46928  | 46929 | DNA helicase RuvA subunit, C-terminal domain                                           | 2467         | 745          | 2413            | 490             | 7                 | 28                | 28            | 6              | 11             | 1689  | 1688               | 0     | 2               | 57                   | 1886     | 1       | 0     | 0       | 938            | 214            | 30         | 0   | 1     |
| 46456 | 46928  | 46934 | UBA-like                                                                               | 22958        | 1253         | 19302           | 1187            | 5                 | 130               | 130           | 273            | 130            | 4788  | 4786               | 0     | 13              | 207                  | 3720     | 0       | 99    | 310     | 1649           | 262            | 1129       | 84  | 516   |
| 46456 | 46928  | 46938 | CRAL/TRIO N-terminal domain                                                            | 7018         | 810          | 4204            | 477             | 13                | 36                | 36            | 40             | 27             | 761   | 760                | 0     | 0               | 0                    | 1        | 0       | 77    | 276     | 1              | 0              | 0          | 16  | 359   |
| 46456 | 46928  | 46942 | Elongation factor TFIIS domain 2                                                       | 3602         | 976          | 437             | 409             | 8                 | 13                | 13            | 11             | 9              | 388   | 388                | 0     | 0               | 0                    | 0        | 0       | 26    | 42      | 0              | 0              | 0          | 0   | 1     |
| 46456 | 81297  | 46946 | S13-like H2TH domain                                                                   | 12237        | 1345         | 11882           | 1211            | 2                 | 469               | 469           | 23             | 29             | 6619  | 6615               | 2     | 42              | 254                  | 6263     | 141     | 29    | 177     | 2762           | 1082           | 1398       | 1   | 2     |
| 46456 | 46928  | 46950 | Double-stranded DNA-binding domain                                                     | 1216         | 1025         | 1197            | 946             | 3                 | 5                 | 5             | 17             | 9              | 1032  | 1031               | 0     | 33              | 38                   | 1        | 310     | 68    | 241     | 0              | 0              | 0          | 0   | 48    |
| 46456 | 46954  | 46955 | Putative DNA-binding domain                                                            | 29703        | 938          | 26128           | 933             | 14                | 91                | 91            | 140            | 87             | 6878  | 6860               | 15    | 18              | 153                  | 6184     | 1       | 6     | 293     | 3203           | 800            | 1676       | 8   | 354   |
| 46456 | 46965  | 46966 | Spectrin repeat                                                                        | 11241        | 670          | 9925            | 670             | 1                 | 47                | 47            | 887            | 593            | 686   | 685                | 0     | 0               | 0                    | 0        | 0       | 0     | 519     | 0              | 0              | 0          | 0   | 0     |
| 46456 | 46965  | 46973 | Enzyme IIa from lactose specific PTS, IIa-lac                                          | 4506         | 1061         | 4340            | 1056            | 14                | 38                | 38            | 5              | 7              | 1404  | 1404               | 0     | 0               | 0                    | 20       | 1403    | 0     | 0       | 380            | 54             | 891        | 0   | 1     |
| 46456 | 46965  | 46977 | Succinate dehydrogenase fumarate reductase flavoprotein C-terminal domain              | 13685        | 1208         | 13635           | 1048            | 18                | 115               | 115           | 30             | 32             | 6236  | 6233               | 0     | 21              | 128                  | 5410     | 104     | 71    | 241     | 3400           | 870            | 539        | 30  | 344   |
| 46456 | 46965  | 46984 | Smac/diablo                                                                            | 1129         | 406          | 323             | 0               | 3                 | 3                 | 3             | 1              | 4              | 180   | 180                | 0     | 0               | 0                    | 0        | 0       | 0     | 180     | 0              | 0              | 0          | 0   | 0     |
| 46456 | 46965  | 46988 | Tubulin chaperone cofactor A                                                           | 823          | 861          | 781             | 10              | 4                 | 5                 | 5             | 5              | 665            | 664   | 0                  | 0     | 0               | 0                    | 0        | 0       | 69    | 235     | 0              | 0              | 0          | 38  | 296   |
| 46456 | 46965  | 46992 | Ribosomal protein S20                                                                  | 5191         | 2003         | 5184            | 98              | 377               | 378               | 378           | 1              | 5              | 4406  | 4405               | 0     | 12              | 172                  | 4324     | 0       | 56    | 1       | 1852           | 809            | 904        | 16  | 0     |
| 46456 | 46966  | 46997 | Bacterial immunoglobulin/albumin-binding domains                                       | 3693         | 725          | 3282            | 723             | 21                | 62                | 62            | 453            | 65             | 793   | 769                | 0     | 0               | 0                    | 0        | 767     | 0     | 0       | 1              | 0              | 0          | 767 | 0     |
| 46456 | 47004  | 47005 | Peripheral subunit-binding domain of 2-oxo acid dehydrogenase complex                  | 7123         | 1302         | 7122            | 1301            | 24                | 22                | 24            | 21             | 27             | 2756  | 2755               | 0     | 6               | 7                    | 2323     | 18      | 59    | 193     | 1460           | 39             | 628        | 21  | 124   |
| 46456 | 47013  | 47014 | Protozoan pheromone proteins                                                           | 5            | 3            | 5               | 0               | 2                 | 3                 | 3             | 1              | 4              | 1     | 1                  | 0     | 0               | 0                    | 0        | 0       | 0     | 0       | 0              | 0              | 0          | 0   | 1     |
| 46456 | 47026  | 47027 | Acyl-CoA binding protein                                                               | 5102         | 1961         | 4538            | 1941            | 30                | 30                | 30            | 72             | 25             | 1373  | 1371               | 1     | 3               | 3                    | 503      | 3       | 85    | 310     | 333            | 36             | 0          | 71  | 363   |
| 46456 | 47026  | 47031 | Second domain of FERM                                                                  | 16107        | 1226         | 14982           | 1224            | 42                | 90                | 90            | 269            | 167            | 334   | 333                | 0     | 0               | 0                    | 0        | 1       | 0     | 5       | 300            | 1              | 0          | 0   | 2     |
| 46456 | 47039  | 47040 | Kix domain of CBP (creb binding protein)                                               | 1568         | 704          | 937             | 700             | 9                 | 10                | 10            | 49             | 37             | 267   | 267                | 0     | 0               | 0                    | 0        | 0       | 0     | 0       | 265            | 0              | 0          | 0   | 0     |
| 46456 | 47044  | 47045 | RAP domain-like                                                                        | 332          | 354          | 329             | 257             | 9                 | 9                 | 9             | 6              | 7              | 237   | 236                | 0     | 0               | 0                    | 0        | 0       | 0     | 236     | 0              | 0              | 0          | 0   | 0     |
| 46456 | 47049  | 47050 | VHP, Villin headpiece domain                                                           | 5021         | 1879         | 4937            | 64              | 26                | 21                | 31            | 47             | 35             | 367   | 366                | 0     | 0               | 0                    | 0        | 0       | 0     | 64      | 276            | 0              | 0          | 0   | 5     |
| 46456 | 47054  | 47055 | TAH(II)230 TBP-binding fragment                                                        | 458          | 557          | 56              | 0               | 1                 | 1                 | 1             | 4              | 6              | 27    | 27                 | 0     | 0               | 0                    | 0        | 0       | 0     | 27      | 0              | 0              | 0          | 0   | 0     |
| 46456 | 47059  | 47060 | S15/NS1 RNA-binding domain                                                             | 11636        | 890          | 11620           | 889             | 3                 | 141               | 144           | 79             | 66             | 10269 | 4326               | 5942  | 13              | 223                  | 4062     | 1       | 4     | 243     | 1806           | 525            | 1159       | 12  | 0     |
| 46456 | 47071  | 47072 | Cysteine alpha-hairpin motif                                                           | 840          | 1080         | 592             | 6               | 10                | 9                 | 10            | 8              | 9              | 441   | 440                | 0     | 0               | 0                    | 0        | 0       | 57    | 218     | 1              | 0              | 0          | 0   | 13    |
| 46456 | 47076  | 47077 | T4 endonuclease V                                                                      | 238          | 557          | 207             | 0               | 7                 | 7                 | 7             | 1              | 4              | 138   | 67                 | 71    |                 |                      |          |         |       |         |                |                |            |     |       |







|       |       |       |                                                         |        |      |        |      |     |      |      |      |      |       |       |     |     |     |       |     |      |      |      |      |      |     |     |     |
|-------|-------|-------|---------------------------------------------------------|--------|------|--------|------|-----|------|------|------|------|-------|-------|-----|-----|-----|-------|-----|------|------|------|------|------|-----|-----|-----|
| 48724 | 51091 | 51101 | Mannose-binding lectins                                 | 3121   | 674  | 1799   | 648  | 172 | 215  | 215  | 89   | 28   | 362   | 361   | 0   | 0   | 0   | 0     | 110 | 0    | 97   | 89   | 43   | 41   | 6   | 10  | 51  |
| 48724 | 51109 | 51110 | alpha-D-mannose-specific plant lectins                  | 5654   | 972  | 700    | 177  | 71  | 72   | 77   | 64   | 30   | 471   | 463   | 6   | 0   | 0   | 0     | 336 | 1    | 83   | 10   | 61   | 230  | 9   | 3   | 24  |
| 48724 | 51125 | 51120 | beta-Roll                                               | 5000   | 594  | 750    | 554  | 28  | 28   | 28   | 24   | 8    | 210   | 210   | 0   | 1   | 1   | 1     | 210 | 0    | 0    | 0    | 208  | 0    | 0   | 0   | 0   |
| 48724 | 51125 | 51156 | Pectin lyase-like                                       | 50473  | 737  | 20582  | 701  | 13  | 175  | 175  | 642  | 79   | 3139  | 3097  | 39  | 3   | 64  | 2485  | 22  | 185  | 20   | 1366 | 357  | 375  | 18  | 364 |     |
| 48724 | 51125 | 51156 | Insect cysteine-rich antifreeze protein                 | 165    | 1919 | 63     | 59   | 3   | 3    | 3    | 5    | 6    | 9     | 9     | 0   | 0   | 0   | 0     | 8   | 1    | 0    | 0    | 8    | 0    | 0   | 0   | 0   |
| 48724 | 51160 | 51161 | Trimeric LpxA-like enzymes                              | 53278  | 1137 | 40342  | 1118 | 22  | 420  | 420  | 319  | 52   | 9363  | 9355  | 5   | 44  | 288 | 8352  | 195 | 149  | 243  | 4120 | 789  | 1845 | 20  | 370 |     |
| 48724 | 51160 | 51177 | An insect antifreeze protein                            | 24     | 34   | 7      | 0    | 11  | 11   | 11   | 1    | 4    | 1     | 1     | 0   | 0   | 0   | 0     | 1   | 0    | 0    | 1    | 0    | 0    | 0   | 0   | 0   |
| 48724 | 51181 | 51182 | RmlC-like cupins                                        | 126795 | 809  | 73057  | 651  | 12  | 661  | 666  | 235  | 73   | 10991 | 10974 | 11  | 70  | 389 | 9504  | 352 | 264  | 298  | 3974 | 1391 | 2200 | 38  | 461 |     |
| 48724 | 51181 | 51197 | Clavaminate synthase-like                               | 60413  | 1259 | 32689  | 831  | 11  | 385  | 394  | 140  | 92   | 6723  | 6717  | 4   | 29  | 124 | 5505  | 10  | 538  | 247  | 3002 | 1054 | 543  | 27  | 358 |     |
| 48724 | 51181 | 51206 | cAMP-binding domain-like                                | 31258  | 1461 | 31055  | 1459 | 98  | 346  | 346  | 363  | 202  | 6617  | 6610  | 0   | 25  | 98  | 5611  | 1   | 115  | 340  | 2449 | 952  | 1042 | 87  | 416 |     |
| 48724 | 51181 | 51215 | Regulatory protein AraC                                 | 5000   | 556  | 696    | 4    | 10  | 10   | 10   | 5    | 5    | 373   | 371   | 0   | 0   | 0   | 0     | 371 | 0    | 0    | 0    | 314  | 9    | 39  | 0   | 0   |
| 48724 | 51181 | 51219 | TRAP-like                                               | 6368   | 1912 | 5363   | 6    | 1   | 265  | 265  | 13   | 6    | 2947  | 2944  | 0   | 19  | 113 | 2482  | 186 | 62   | 0    | 478  | 599  | 964  | 15  | 191 |     |
| 48724 | 51224 | 51225 | Fibre shaft of virus attachment proteins                | 270    | 135  | 122    | 82   | 30  | 30   | 30   | 18   | 7    | 40    | 1     | 37  | 0   | 0   | 0     | 1   | 0    | 0    | 0    | 1    | 0    | 0   | 0   | 0   |
| 48724 | 51229 | 51230 | Single hybrid motif                                     | 35711  | 1069 | 35692  | 1069 | 10  | 133  | 133  | 89   | 120  | 8560  | 8551  | 0   | 61  | 247 | 7453  | 191 | 103  | 284  | 3616 | 1143 | 1458 | 49  | 433 |     |
| 48724 | 51229 | 51246 | Rudiment single hybrid motif                            | 28696  | 763  | 21466  | 763  | 13  | 208  | 208  | 73   | 134  | 8037  | 8034  | 0   | 34  | 241 | 6375  | 140 | 795  | 261  | 3306 | 779  | 1134 | 10  | 443 |     |
| 48724 | 51229 | 51261 | Duplicated hybrid motif                                 | 25000  | 2253 | 5264   | 129  | 17  | 25   | 25   | 22   | 14   | 1690  | 1689  | 0   | 2   | 45  | 1688  | 0   | 0    | 0    | 534  | 59   | 1061 | 0   | 1   |     |
| 48724 | 51268 | 51269 | AFP III-like domain                                     | 4486   | 893  | 3420   | 809  | 43  | 20   | 51   | 21   | 15   | 1819  | 1818  | 0   | 7   | 38  | 1571  | 49  | 2    | 195  | 740  | 45   | 403  | 0   | 1   |     |
| 48724 | 51268 | 51274 | Head decoration protein D (gpD, major capsid protein D) | 784    | 734  | 663    | 0    | 18  | 18   | 18   | 2    | 4    | 136   | 129   | 4   | 0   | 0   | 129   | 0   | 0    | 0    | 128  | 0    | 0    | 0   | 0   | 0   |
| 48724 | 51268 | 51278 | Urease, beta-subunit                                    | 4759   | 1233 | 4575   | 1233 | 11  | 60   | 60   | 18   | 17   | 2948  | 2948  | 0   | 18  | 32  | 2486  | 63  | 63   | 11   | 1382 | 660  | 274  | 15  | 307 |     |
| 48724 | 51268 | 51283 | dUTPase-like                                            | 16857  | 1560 | 15902  | 1354 | 26  | 374  | 374  | 91   | 62   | 8392  | 7944  | 445 | 44  | 339 | 6917  | 267 | 70   | 262  | 2826 | 1285 | 1435 | 159 | 345 |     |
| 48724 | 51268 | 51289 | Tjp20, haeculovirus telukin-like protein                | 77     | 88   | 73     | 0    | 1   | 1    | 1    | 1    | 4    | 57    | 0     | 57  | 0   | 0   | 0     | 0   | 0    | 0    | 0    | 0    | 0    | 0   | 0   | 0   |
| 48724 | 51293 | 51294 | Hedgehog/mimic (Htt) domain                             | 10750  | 841  | 2845   | 889  | 6   | 52   | 52   | 307  | 98   | 1459  | 1425  | 29  | 5   | 18  | 894   | 125 | 3    | 290  | 118  | 330  | 120  | 9   | 91  |     |
| 48724 | 51305 | 51306 | LexA/Signal peptide                                     | 16137  | 919  | 16004  | 884  | 14  | 47   | 47   | 31   | 21   | 6651  | 6607  | 25  | 19  | 225 | 6601  | 1   | 1    | 2    | 3562 | 1137 | 1214 | 0   | 1   |     |
| 48724 | 51315 | 51316 | MsaI-like                                               | 11707  | 1338 | 7014   | 1337 | 8   | 51   | 51   | 33   | 24   | 3690  | 3689  | 0   | 5   | 40  | 2844  | 18  | 86   | 317  | 1101 | 486  | 1115 | 56  | 328 |     |
| 48724 | 51321 | 51322 | Cyanovirin-N                                            | 735    | 550  | 304    | 1    | 59  | 59   | 59   | 8    | 8    | 164   | 163   | 0   | 0   | 0   | 18    | 0   | 2    | 0    | 4    | 0    | 0    | 0   | 0   | 142 |
| 48724 | 51326 | 51327 | Head-binding domain of phage P22 tailspike protein      | 724    | 599  | 706    | 0    | 11  | 11   | 11   | 12   | 8    | 257   | 241   | 16  | 0   | 0   | 241   | 0   | 0    | 0    | 241  | 0    | 0    | 0   | 0   | 0   |
| 48724 | 51331 | 51332 | E2 regulatory, transactivation domain                   | 737    | 636  | 723    | 479  | 11  | 13   | 13   | 3    | 5    | 337   | 1     | 335 | 0   | 0   | 1     | 0   | 0    | 0    | 0    | 0    | 0    | 0   | 0   | 0   |
| 48724 | 51337 | 51338 | Composite domain of metallo-dependent hydrolases        | 72186  | 1691 | 10734  | 15   | 2   | 435  | 437  | 41   | 34   | 4531  | 4530  | 0   | 16  | 79  | 4048  | 46  | 28   | 174  | 1965 | 819  | 808  | 14  | 208 |     |
| 48724 | 51343 | 51344 | Epitope subunit of F1F0-ATP synthase N-terminal domain  | 5002   | 1006 | 4995   | 1001 | 22  | 14   | 27   | 6    | 11   | 4090  | 4088  | 0   | 10  | 43  | 3084  | 1   | 800  | 171  | 1923 | 270  | 606  | 2   | 1   |     |
| 51349 | 51350 | 51351 | Triosephosphate isomerase (TIM)                         | 7053   | 563  | 7032   | 552  | 24  | 219  | 243  | 21   | 19   | 5507  | 5504  | 0   | 41  | 293 | 4395  | 330 | 91   | 274  | 1068 | 876  | 1382 | 51  | 316 |     |
| 51349 | 51350 | 51366 | Ribulose-phosphate binding barrel                       | 61890  | 777  | 55480  | 756  | 37  | 878  | 878  | 106  | 72   | 10700 | 10690 | 0   | 95  | 380 | 9279  | 398 | 98   | 267  | 3983 | 1463 | 2156 | 65  | 515 |     |
| 51349 | 51350 | 51391 | Thiamin phosphate synthase                              | 5466   | 1704 | 5460   | 1694 | 20  | 32   | 32   | 23   | 34   | 3390  | 3388  | 0   | 14  | 189 | 2843  | 148 | 67   | 4    | 625  | 197  | 1298 | 4   | 317 |     |
| 51349 | 51350 | 51395 | FMN-linked oxidoreductases                              | 54779  | 2074 | 49823  | 2055 | 16  | 555  | 557  | 137  | 121  | 10331 | 10327 | 0   | 81  | 358 | 8985  | 371 | 103  | 273  | 3935 | 1442 | 2117 | 60  | 469 |     |
| 51349 | 51350 | 51412 | Isoxime monophosphate dehydrogenase (IMPDH)             | 7143   | 630  | 7136   | 22   | 10  | 125  | 125  | 14   | 11   | 4838  | 4835  | 0   | 10  | 167 | 4328  | 1   | 11   | 240  | 1509 | 775  | 1264 | 21  | 221 |     |
| 51349 | 51350 | 51419 | PLP-binding barrel                                      | 27076  | 598  | 26975  | 598  | 2   | 185  | 185  | 49   | 53   | 8569  | 8561  | 31  | 18  | 267 | 7569  | 67  | 94   | 288  | 3163 | 1360 | 1819 | 49  | 443 |     |
| 51349 | 51350 | 51430 | (NAD(P))linked oxidoreductase                           | 32083  | 1035 | 32037  | 974  | 27  | 457  | 457  | 55   | 58   | 7026  | 7022  | 0   | 23  | 98  | 6056  | 81  | 92   | 300  | 2846 | 1188 | 1188 | 30  | 418 |     |
| 51349 | 51350 | 51445 | (Trans)glycosidases                                     | 252735 | 3297 | 177656 | 3272 | 8   | 3074 | 3074 | 2113 | 783  | 14177 | 13939 | 128 | 148 | 509 | 11735 | 203 | 361  | 813  | 4575 | 1847 | 3108 | 60  | 715 |     |
| 51349 | 51350 | 51556 | Metallo-dependent hydrolases                            | 116959 | 579  | 107766 | 578  | 1   | 982  | 982  | 223  | 120  | 12758 | 12746 | 0   | 85  | 451 | 11360 | 356 | 81   | 290  | 4805 | 1655 | 2704 | 79  | 532 |     |
| 51349 | 51350 | 51569 | Aldolase                                                | 109203 | 998  | 99789  | 963  | 22  | 1671 | 1671 | 202  | 145  | 12841 | 12776 | 53  | 143 | 485 | 11199 | 432 | 129  | 341  | 4808 | 1651 | 2520 | 99  | 510 |     |
| 51349 | 51350 | 51604 | Enolase C-terminal domain-like                          | 32042  | 3136 | 31694  | 3130 | 30  | 787  | 791  | 74   | 42   | 8619  | 8611  | 1   | 32  | 155 | 6500  | 213 | 96   | 1081 | 3052 | 1295 | 1173 | 161 | 451 |     |
| 51349 | 51350 | 51621 | Phosphoenolpyruvate/pyruvate domain                     | 43532  | 2491 | 39731  | 2491 | 3   | 560  | 560  | 95   | 63   | 9700  | 9690  | 0   | 115 | 422 | 8739  | 317 | 165  | 244  | 3802 | 1409 | 1758 | 51  | 462 |     |
| 51349 | 51350 | 51645 | Malate synthase G                                       | 5000   | 804  | 3319   | 803  | 12  | 21   | 21   | 2    | 5    | 1886  | 1885  | 0   | 12  | 12  | 1880  | 0   | 0    | 2    | 1473 | 268  | 129  | 1   | 1   |     |
| 51349 | 51350 | 51649 | Rubisco, C-terminal domain                              | 7827   | 2021 | 7827   | 2005 | 113 | 46   | 159  | 6    | 10   | 7927  | 7924  | 0   | 8   | 10  | 776   | 116 | 7029 | 0    | 423  | 32   | 107  | 2   | 0   |     |
| 51349 | 51350 | 51658 | Xylose isomerase-like                                   | 34183  | 733  | 23957  | 720  | 3   | 362  | 362  | 26   | 19   | 7142  | 7137  | 0   | 48  | 312 | 6268  | 184 | 64   | 208  | 2542 | 1019 | 1631 | 64  | 341 |     |
| 51349 | 51350 | 51679 | Bacterial luciferase-like                               | 24392  | 1881 | 21974  | 1712 | 18  | 41   | 43   | 54   | 108  | 4336  | 4330  | 0   | 35  | 36  | 4209  | 253 | 0    | 3    | 1724 | 1312 | 649  | 0   | 45  |     |
| 51349 | 51350 | 51690 | Nicotinate/Quinolinate PRTase C-terminal domain-like    | 15826  | 1117 | 15662  | 1177 | 2   | 133  | 133  | 21   | 29   | 7509  | 7506  | 1   | 20  | 798 | 6481  | 276 | 65   | 217  | 2688 | 936  | 1805 | 49  | 373 |     |
| 51349 | 51350 | 51695 | PLC-like phosphohydrolases                              | 20921  | 1278 | 15504  | 1270 | 9   | 114  | 114  | 171  | 74   | 5050  | 5040  | 9   | 6   | 27  | 4264  | 72  | 70   | 291  | 1821 | 733  | 1128 | 17  | 304 |     |
| 51349 | 51350 | 51703 | Cobalamin (vitamin B12)-dependent enzymes               | 7736   | 580  | 7320   | 573  | 15  | 110  | 110  | 14   | 16   | 3715  | 3712  | 0   | 51  | 128 | 3276  | 202 | 3    | 192  | 1141 | 833  | 517  | 17  | 4   |     |
| 51349 | 51350 | 51713 | RNA-guanine transglycosylase                            | 5315   | 2629 | 5315   | 2599 | 120 | 112  | 120  | 7    | 9    | 3978  | 3977  | 0   | 38  | 120 | 3638  | 333 | 0    | 4    | 2441 | 4    | 1001 | 0   | 1   |     |
| 51349 | 51350 | 51717 | Dihydroxyacetone synthase-like                          | 11287  | 1187 | 11287  | 1182 | 16  | 111  | 115  | 28   | 40   | 5318  | 5317  | 0   | 8   | 141 | 5224  | 8   | 37   | 25   | 2828 | 477  | 1358 | 6   | 176 |     |
| 51349 | 51350 | 51726 | UROD/MeiE-like                                          | 11375  | 2058 | 11365  | 2008 | 2   | 45   | 45   | 17   | 14   | 4892  | 4888  | 0   | 9   | 42  | 4119  | 21  | 91   | 229  | 2402 | 587  | 400  | 20  | 316 |     |
| 51349 | 51350 | 51730 | FAD-linked oxidoreductase                               | 10550  | 1014 | 10548  | 1014 | 11  | 60   | 60   | 12   | 18   | 4609  | 4608  | 0   | 3   | 63  | 4034  | 0   | 66   | 152  | 2993 | 604  | 252  | 18  | 325 |     |
| 51349 | 51734 | 51735 | NAD(P)-binding Rossmann-fold domains                    | 610245 | 2584 | 516238 | 2568 | 12  | 5242 | 5246 | 2687 | 2719 | 19364 | 19261 | 48  | 539 | 916 | 6138  | 686 | 611  | 885  | 6920 | 2590 | 5510 | 141 | 672 |     |
| 51349 | 51904 | 51905 | PAF/NAD(P)-binding domain                               | 219788 | 667  | 138831 | 643  | 2   | 1489 | 1489 | 508  | 395  | 13486 | 13472 | 1   | 143 | 467 | 11780 | 402 | 168  | 378  | 5321 | 1918 | 2514 | 90  | 582 |     |
| 51349 | 51970 | 51971 | Nucleotide-binding domain                               | 27609  | 2394 | 11616  | 1448 | 12  | 202  | 204  | 93   | 121  | 5517  | 5507  | 8   | 24  | 214 |       |     |      |      |      |      |      |     |     |     |

|       |       |       |                                                                 |        |      |        |      |     |      |      |      |     |       |       |     |     |     |       |     |     |      |      |      |      |     |     |     |
|-------|-------|-------|-----------------------------------------------------------------|--------|------|--------|------|-----|------|------|------|-----|-------|-------|-----|-----|-----|-------|-----|-----|------|------|------|------|-----|-----|-----|
| 51349 | 52953 | 52954 | Class II aARS ABD-related                                       | 30993  | 2057 | 12354  | 642  | 5   | 132  | 136  | 84   | 58  | 6233  | 6228  | 0   | 71  | 322 | 4924  | 384 | 75  | 277  | 1675 | 698  | 1404 | 74  | 439 |     |
| 51349 | 52953 | 52964 | ToB, N-terminal domain                                          | 4160   | 616  | 3644   | 616  | 20  | 20   | 20   | 13   | 7   | 2447  | 2445  | 0   | 3   | 12  | 2442  | 0   | 0   | 2    | 2422 | 1    | 4    | 0   | 1   |     |
| 51349 | 52953 | 52968 | B12-dependent dehydroase associated subunit                     | 1099   | 728  | 1057   | 716  | 10  | 26   | 26   | 3    | 6   | 370   | 370   | 0   | 1   | 7   | 367   | 3   | 0   | 0    | 126  | 61   | 152  | 0   | 281 |     |
| 51349 | 52953 | 52972 | ITPase-like                                                     | 15651  | 932  | 15471  | 932  | 11  | 70   | 70   | 36   | 30  | 6946  | 6944  | 2   | 37  | 312 | 5971  | 326 | 65  | 236  | 2797 | 376  | 1625 | 30  | 81  |     |
| 51349 | 52979 | 52980 | Restriction endonuclease-like                                   | 58876  | 1080 | 23809  | 461  | 10  | 385  | 385  | 117  | 44  | 7268  | 7098  | 158 | 53  | 236 | 5947  | 371 | 69  | 256  | 3036 | 597  | 1291 | 56  | 366 |     |
| 51349 | 52979 | 53032 | RNA-intron endonuclease catalytic domain-like                   | 2780   | 776  | 1664   | 642  | 38  | 40   | 40   | 19   | 15  | 916   | 915   | 0   | 39  | 44  | 2     | 361 | 56  | 0    | 1    | 0    | 1    | 0   | 39  | 177 |
| 51349 | 52979 | 53036 | Eukaryotic RPS N-terminal domain                                | 1074   | 636  | 892    | 28   | 113 | 113  | 113  | 15   | 11  | 632   | 632   | 0   | 0   | 0   | 0     | 0   | 0   | 0    | 173  | 0    | 0    | 0   | 44  | 309 |
| 51349 | 53040 | 53041 | Resolvase-like                                                  | 5000   | 1531 | 4990   | 1412 | 20  | 20   | 22   | 12   | 6   | 2009  | 1995  | 8   | 5   | 8   | 1989  | 2   | 1   | 0    | 1250 | 302  | 309  | 0   | 2   |     |
| 51349 | 53040 | 53056 | beta-carbonic anhydrase, cab                                    | 10020  | 792  | 9950   | 792  | 6   | 161  | 161  | 24   | 15  | 4875  | 4873  | 0   | 7   | 56  | 4381  | 38  | 108 | 4    | 2443 | 662  | 667  | 19  | 300 |     |
| 51349 | 53061 | 53062 | PTS system fructose IIA component-like                          | 8481   | 1209 | 8339   | 49   | 8   | 41   | 41   | 14   | 17  | 3333  | 3333  | 0   | 5   | 42  | 3308  | 28  | 0   | 1    | 1486 | 637  | 1015 | 0   | 1   |     |
| 51349 | 53066 | 53067 | Actin-like ATPase domain                                        | 124837 | 818  | 113125 | 814  | 2   | 1140 | 1140 | 275  | 200 | 15843 | 15798 | 29  | 100 | 475 | 11968 | 278 | 360 | 1601 | 4992 | 1671 | 2801 | 419 | 961 |     |
| 51349 | 53066 | 53092 | Creatine phosphatase N-terminal domain                          | 12424  | 1957 | 8570   | 1691 | 12  | 84   | 84   | 12   | 10  | 4341  | 4339  | 0   | 24  | 54  | 3806  | 78  | 54  | 24   | 2035 | 189  | 1044 | 4   | 270 |     |
| 51349 | 53066 | 53098 | Ribonuclease H-like                                             | 131411 | 752  | 87172  | 389  | 30  | 1064 | 1064 | 521  | 239 | 12665 | 12362 | 287 | 72  | 425 | 10037 | 378 | 81  | 295  | 5025 | 1584 | 2509 | 87  | 526 |     |
| 51349 | 53066 | 53137 | Translational machinery components                              | 15071  | 906  | 13342  | 906  | 115 | 817  | 817  | 31   | 29  | 7144  | 7131  | 12  | 87  | 350 | 5233  | 433 | 603 | 275  | 2007 | 644  | 1377 | 118 | 393 |     |
| 51349 | 53066 | 53146 | Nitrogenase accessory factor-like                               | 5212   | 971  | 4277   | 971  | 5   | 14   | 14   | 14   | 19  | 1851  | 1848  | 0   | 12  | 103 | 1686  | 162 | 0   | 0    | 682  | 41   | 623  | 0   | 0   |     |
| 51349 | 53066 | 53150 | DNA repair protein MutS, domain II                              | 5653   | 2275 | 5610   | 2248 | 34  | 34   | 34   | 15   | 18  | 3540  | 3539  | 0   | 17  | 195 | 3399  | 133 | 2   | 5    | 1915 | 2    | 497  | 0   | 0   |     |
| 51349 | 53066 | 53155 | Methylated DNA-protein cysteine methyltransferase domain        | 5282   | 1167 | 2876   | 1163 | 1   | 16   | 16   | 26   | 18  | 1501  | 1497  | 0   | 4   | 4   | 1347  | 24  | 0   | 125  | 1254 | 5    | 5    | 0   | 1   |     |
| 51349 | 53162 | 53163 | Hyd-Like                                                        | 5894   | 1905 | 4095   | 761  | 9   | 13   | 13   | 9    | 10  | 2412  | 2412  | 0   | 9   | 173 | 2288  | 113 | 1   | 0    | 826  | 352  | 904  | 0   | 0   |     |
| 51349 | 53162 | 53167 | Purine and uridine phosphorylases                               | 28647  | 941  | 27446  | 940  | 50  | 1082 | 1082 | 40   | 27  | 9236  | 9221  | 2   | 48  | 394 | 8097  | 323 | 39  | 297  | 3111 | 1265 | 2077 | 64  | 356 |     |
| 51349 | 53162 | 53178 | Peptidyl-RNA hydrolase-like                                     | 6677   | 2101 | 6677   | 2057 | 12  | 53   | 53   | 8    | 10  | 4628  | 4626  | 0   | 8   | 242 | 4548  | 1   | 70  | 6    | 1635 | 750  | 1479 | 0   | 1   |     |
| 51349 | 53162 | 53182 | Pyroglutamate carboxyl peptidase (pyroglutamate aminopeptidase) | 5000   | 1004 | 3547   | 1004 | 54  | 68   | 68   | 10   | 10  | 1985  | 1984  | 0   | 12  | 30  | 1639  | 64  | 46  | 203  | 533  | 331  | 635  | 12  | 11  |     |
| 51349 | 53162 | 53187 | Zn-dependent coxpeptidases                                      | 116214 | 848  | 65454  | 372  | 2   | 677  | 677  | 404  | 186 | 10401 | 10387 | 10  | 58  | 369 | 9079  | 314 | 82  | 374  | 5865 | 1042 | 2399 | 25  | 493 |     |
| 51349 | 53162 | 53213 | Lig-Like                                                        | 7950   | 1383 | 6021   | 1318 | 23  | 23   | 23   | 12   | 16  | 3330  | 3328  | 0   | 2   | 11  | 3107  | 19  | 75  | 5    | 1870 | 645  | 308  | 2   | 111 |     |
| 51349 | 53217 | 53218 | Molybdenum cofactor biosynthesis proteins                       | 16553  | 1925 | 15771  | 1924 | 35  | 147  | 147  | 53   | 53  | 6700  | 6699  | 0   | 43  | 117 | 5151  | 313 | 71  | 245  | 3000 | 1157 | 956  | 20  | 284 |     |
| 51349 | 53222 | 53223 | Aminoacid dehydrogenase, N-terminal domain                      | 40008  | 576  | 39614  | 575  | 4   | 407  | 407  | 92   | 88  | 9751  | 9745  | 0   | 78  | 358 | 8498  | 379 | 126 | 297  | 3718 | 1221 | 2001 | 48  | 346 |     |
| 51349 | 53243 | 53244 | MurD-like peptide ligase, peptide-binding domain                | 37286  | 1442 | 36068  | 1453 | 1   | 62   | 62   | 67   | 75  | 9355  | 9352  | 0   | 24  | 364 | 9226  | 98  | 11  | 8    | 3837 | 1339 | 2178 | 1   | 8   |     |
| 51349 | 53253 | 53254 | Phosphoglycerate mutase-like                                    | 23227  | 1755 | 21650  | 1728 | 41  | 250  | 250  | 84   | 64  | 6458  | 6456  | 0   | 8   | 184 | 5421  | 26  | 77  | 309  | 1978 | 1243 | 1332 | 70  | 509 |     |
| 51349 | 53270 | 53271 | Phosphoglycerate mutase-like                                    | 60298  | 910  | 58719  | 888  | 13  | 482  | 482  | 107  | 73  | 11153 | 11123 | 5   | 90  | 409 | 9785  | 353 | 83  | 316  | 3878 | 1610 | 2405 | 74  | 454 |     |
| 51349 | 53299 | 53300 | vWA-Like                                                        | 29524  | 949  | 23882  | 743  | 4   | 317  | 317  | 1310 | 619 | 4070  | 4054  | 14  | 14  | 92  | 3399  | 144 | 78  | 994  | 1188 | 88   | 76   | 65  | 510 |     |
| 51349 | 53322 | 53323 | Pyruvate-ferredoxin oxidoreductase, PFOR, domain III            | 5000   | 939  | 4957   | 932  | 20  | 20   | 20   | 130  | 29  | 2292  | 2291  | 0   | 7   | 230 | 2249  | 1   | 3   | 6    | 617  | 1113 | 919  | 8   | 1   |     |
| 51349 | 53327 | 53328 | Formyltransferase                                               | 12959  | 798  | 12959  | 796  | 15  | 98   | 98   | 40   | 71  | 5134  | 5132  | 0   | 25  | 239 | 4799  | 71  | 0   | 260  | 2889 | 30   | 1419 | 0   | 1   |     |
| 51349 | 53334 | 53335 | S-adenosyl-L-methionine-dependent methyltransferases            | 311483 | 0    | 191416 | 0    | 0   | 1364 | 1364 | 811  | 271 | 15987 | 15425 | 532 | 228 | 603 | 13337 | 525 | 390 | 451  | 5891 | 1893 | 3126 | 96  | 549 |     |
| 51349 | 53382 | 53383 | PLP-dependent methyltransferases                                | 156687 | 821  | 155591 | 821  | 6   | 1205 | 1205 | 234  | 297 | 14240 | 14221 | 0   | 166 | 512 | 11746 | 452 | 197 | 1094 | 5138 | 1736 | 2745 | 106 | 547 |     |
| 51349 | 53447 | 53448 | Nucleoside-diphospho-sugar transferases                         | 97866  | 820  | 66466  | 534  | 1   | 733  | 733  | 348  | 128 | 10858 | 10853 | 2   | 43  | 374 | 9462  | 276 | 171 | 305  | 4233 | 1145 | 2234 | 54  | 526 |     |
| 51349 | 53473 | 53474 | alpha/beta-Hydrolases                                           | 162537 | 1371 | 130298 | 1232 | 2   | 1918 | 1920 | 1055 | 847 | 12236 | 12167 | 18  | 101 | 334 | 10745 | 309 | 110 | 490  | 4777 | 1831 | 2694 | 58  | 605 |     |
| 51349 | 53589 | 53590 | Nucleoside hydrolase                                            | 5980   | 1445 | 5976   | 1420 | 49  | 67   | 67   | 5    | 10  | 2468  | 2467  | 0   | 3   | 34  | 2344  | 5   | 61  | 6    | 1100 | 386  | 694  | 3   | 10  |     |
| 51349 | 53596 | 53597 | Dihydrofolate reductase-like                                    | 16279  | 1209 | 16224  | 1208 | 1   | 627  | 627  | 54   | 41  | 6982  | 6912  | 61  | 19  | 181 | 6019  | 196 | 72  | 256  | 2799 | 639  | 1393 | 83  | 274 |     |
| 51349 | 53612 | 53613 | Ribokinase-like                                                 | 44200  | 1370 | 43019  | 1354 | 17  | 253  | 255  | 59   | 82  | 9241  | 9237  | 0   | 32  | 335 | 8144  | 279 | 92  | 270  | 3498 | 1013 | 2297 | 26  | 379 |     |
| 51349 | 53612 | 53623 | MurD-like peptide ligases, catalytic domain                     | 25750  | 1667 | 25504  | 2165 | 3   | 49   | 50   | 33   | 70  | 7135  | 7134  | 0   | 11  | 290 | 7102  | 14  | 6   | 6    | 3511 | 322  | 2031 | 6   | 6   |     |
| 51349 | 53632 | 53633 | Carbamate kinase-like                                           | 21861  | 655  | 21624  | 654  | 18  | 138  | 138  | 41   | 53  | 7932  | 7929  | 0   | 59  | 348 | 7562  | 232 | 76  | 6    | 3231 | 1213 | 1683 | 24  | 1   |     |
| 51349 | 53638 | 53639 | AradHMP-PK domain-like                                          | 10830  | 564  | 10604  | 564  | 49  | 87   | 87   | 22   | 26  | 4420  | 4419  | 0   | 28  | 188 | 4009  | 317 | 0   | 3    | 1501 | 823  | 1173 | 0   | 0   |     |
| 51349 | 53648 | 53649 | Alkaline phosphatase-like                                       | 29755  | 657  | 22556  | 649  | 1   | 254  | 255  | 58   | 44  | 6600  | 6590  | 0   | 14  | 283 | 6009  | 52  | 2   | 288  | 2773 | 1265 | 1439 | 9   | 220 |     |
| 51349 | 53658 | 53659 | Isocitrate/isopropylmalate dehydrogenase-like                   | 38983  | 3505 | 37199  | 3340 | 13  | 263  | 264  | 42   | 42  | 9584  | 9578  | 0   | 34  | 310 | 8400  | 212 | 92  | 321  | 3943 | 1383 | 1833 | 66  | 396 |     |
| 51349 | 53670 | 53671 | Aspartate/ornithine carbonyltransferase                         | 20048  | 811  | 20032  | 811  | 15  | 303  | 303  | 61   | 82  | 8708  | 8694  | 0   | 16  | 317 | 5800  | 376 | 75  | 260  | 3014 | 1208 | 1854 | 49  | 395 |     |
| 51349 | 53670 | 53681 | Aspartate/glutamate racemase                                    | 12312  | 1191 | 12268  | 8    | 21  | 71   | 71   | 7    | 17  | 5988  | 5987  | 0   | 78  | 236 | 7500  | 66  | 25  | 3    | 2208 | 917  | 1698 | 0   | 43  |     |
| 51349 | 53685 | 53686 | Tryptophan synthase beta subunit-like PLP-dependent enzymes     | 27146  | 2136 | 26930  | 2136 | 12  | 195  | 207  | 51   | 69  | 8822  | 8815  | 0   | 61  | 319 | 7759  | 351 | 95  | 168  | 3391 | 1300 | 1722 | 20  | 407 |     |
| 51349 | 53696 | 53697 | SIS domain                                                      | 26880  | 1780 | 25064  | 1780 | 9   | 115  | 124  | 42   | 52  | 8596  | 8589  | 0   | 67  | 341 | 8029  | 304 | 116 | 11   | 3284 | 1188 | 1878 | 37  | 86  |     |
| 51349 | 53705 | 53706 | Formate dehydrogenase/DMSO reductase, domains 1-3               | 10000  | 0    | 9990   | 0    | 0   | 20   | 20   | 97   | 47  | 3269  | 3268  | 0   | 9   | 27  | 3114  | 148 | 2   | 3    | 2103 | 289  | 605  | 0   | 1   |     |
| 51349 | 53719 | 53720 | ALDH-like                                                       | 15000  | 7678 | 14748  | 7671 | 56  | 345  | 401  | 45   | 91  | 6285  | 6279  | 0   | 15  | 177 | 5144  | 148 | 96  | 310  | 2307 | 867  | 1201 | 21  | 495 |     |
| 51349 | 53731 | 53732 | Acetoinase iron-sulfur domain                                   | 14106  | 926  | 14060  | 924  | 6   | 23   | 23   | 29   | 21  | 6063  | 6058  | 0   | 50  | 132 | 5063  | 162 | 77  | 291  | 3099 | 308  | 738  | 36  | 406 |     |
| 51349 | 53737 | 53738 | Phosphoglucomutase, first 3 domains                             | 14145  | 1026 | 11399  | 1026 | 15  | 44   | 44   | 35   | 28  | 5331  | 5329  | 0   | 12  | 58  | 4434  | 71  | 88  | 277  | 2911 | 947  | 1617 | 46  | 376 |     |
| 51349 | 53742 | 53743 | FucA/ArA N-terminal and middle domains                          | 6330   | 1955 | 4000   | 1943 | 30  | 36   | 36   | 12   | 6   | 1935  | 1934  | 0   | 2   | 109 | 1922  | 2   | 0   | 0    | 437  | 460  | 645  | 0   | 0   |     |
| 51349 | 53747 | 53748 | Phosphoglycerate kinase                                         | 13671  | 3914 | 12455  | 3801 | 42  | 66   | 66   | 29   | 24  | 8435  | 8432  | 0   | 37  | 331 | 9136  | 328 | 161 | 313  | 2839 | 1142 | 1657 | 81  | 362 |     |
| 51349 | 53755 | 53756 | UDP-Glycosyltransferase/glycosyl phosphorylase                  | 40599  | 5940 | 32936  | 4881 | 20  | 119  | 119  | 89   | 59  | 9252  | 9241  | 8   | 33  | 274 | 8257  |     |     |      |      |      |      |     |     |     |



|       |       |       |                                                                                     |       |      |        |      |     |      |      |      |      |       |       |     |     |     |       |     |     |      |      |      |      |     |     |     |
|-------|-------|-------|-------------------------------------------------------------------------------------|-------|------|--------|------|-----|------|------|------|------|-------|-------|-----|-----|-----|-------|-----|-----|------|------|------|------|-----|-----|-----|
| 53931 | 55815 | 55816 | 5-nucleotidase (syn. UDP-sugar hydrolase), C-terminal domain                        | 7153  | 1283 | 6774   | 1000 | 3   | 26   | 26   | 95   | 43   | 3475  | 3472  | 1   | 4   | 32  | 2951  | 21  | 4   | 250  | 1280 | 568  | 826  | 0   | 0   | 243 |
| 53931 | 55820 | 55821 | YhcR/RibB                                                                           | 16356 | 2659 | 16344  | 2644 | 17  | 23   | 33   | 30   | 26   | 7543  | 7541  | 0   | 21  | 294 | 6867  | 162 | 65  | 7    | 2907 | 997  | 1703 | 9   | 407 |     |
| 53931 | 55825 | 55826 | YbaK/PrfR associated domain                                                         | 10424 | 1969 | 10384  | 1937 | 14  | 15   | 21   | 23   | 17   | 5117  | 5115  | 0   | 10  | 266 | 4746  | 54  | 57  | 169  | 2155 | 826  | 1358 | 62  | 4   |     |
| 53931 | 55830 | 55831 | Thymidylate synthase/CMF hydroxymethylase                                           | 5279  | 1245 | 5081   | 1255 | 13  | 226  | 237  | 6    | 12   | 3941  | 3929  | 9   | 13  | 173 | 3828  | 9   | 9   | 76   | 1679 | 748  | 729  | 5   | 1   |     |
| 53931 | 55845 | 55846 | N-acetyltransferase/L-alanine amidase-like                                          | 16003 | 617  | 15214  | 595  | 7   | 211  | 211  | 158  | 36   | 5692  | 5573  | 118 | 11  | 174 | 5258  | 2   | 0   | 299  | 2780 | 965  | 952  | 0   | 14  |     |
| 53931 | 55855 | 55856 | Cytochrome b5-like hemesteroid binding domain                                       | 10763 | 1191 | 10043  | 1144 | 24  | 110  | 110  | 170  | 135  | 1482  | 1477  | 4   | 2   | 3   | 328   | 2   | 0   | 299  | 2780 | 965  | 952  | 0   | 14  |     |
| 53931 | 55868 | 55869 | DNA topoisomerase I domain                                                          | 73    | 73   | 67     | 0    | 4   | 4    | 4    | 2    | 5    | 38    | 0     | 38  | 0   | 0   | 0     | 0   | 0   | 0    | 0    | 0    | 0    | 0   | 0   | 0   |
| 53931 | 55873 | 55874 | ATPase domain of HSP90 chaperone/DNA topoisomerase II/histidine kinase              | 67564 | 1648 | 63213  | 1578 | 30  | 586  | 586  | 2430 | 507  | 10457 | 10425 | 21  | 38  | 300 | 8826  | 140 | 118 | 531  | 4802 | 1024 | 1888 | 159 | 527 |     |
| 53931 | 55889 | 55890 | Sporulation response regulatory protein Spo0B                                       | 5000  | 1886 | 4      | 326  | 10  | 0    | 10   | 6    | 5    | 206   | 206   | 0   | 0   | 0   | 206   | 0   | 0   | 0    | 0    | 1    | 0    | 205 | 0   |     |
| 53931 | 55894 | 55895 | Ribonuclease Rh-like                                                                | 5409  | 1077 | 4296   | 39   | 10  | 29   | 29   | 20   | 11   | 1774  | 1770  | 4   | 1   | 1   | 957   | 0   | 152 | 256  | 924  | 1    | 0    | 20  | 369 |     |
| 53931 | 55903 | 55904 | Ominithine decarboxylase C-terminal domain                                          | 5000  | 1164 | 4984   | 1154 | 3   | 16   | 16   | 5    | 7    | 1592  | 1591  | 0   | 2   | 19  | 1584  | 5   | 0   | 1    | 1418 | 36   | 107  | 0   | 1   |     |
| 53931 | 55908 | 55909 | Pentene                                                                             | 19470 | 748  | 17289  | 711  | 13  | 171  | 171  | 40   | 26   | 6640  | 6610  | 26  | 60  | 206 | 5410  | 356 | 106 | 289  | 2323 | 1110 | 900  | 62  | 343 |     |
| 53931 | 55919 | 55920 | Creininase/aminopeptidase                                                           | 19152 | 1004 | 19151  | 1003 | 29  | 196  | 207  | 31   | 51   | 7345  | 7341  | 0   | 54  | 188 | 6153  | 332 | 72  | 271  | 2994 | 825  | 1524 | 70  | 394 |     |
| 53931 | 55930 | 55931 | Glutamine synthase/guanido kinase                                                   | 25100 | 0    | 19999  | 0    | 0   | 392  | 392  | 36   | 33   | 8295  | 8293  | 0   | 31  | 178 | 6135  | 53  | 53  | 1733 | 3342 | 1142 | 1279 | 34  | 2   |     |
| 53931 | 55944 | 55945 | TATA-box binding protein                                                            | 8616  | 767  | 5877   | 761  | 38  | 145  | 145  | 37   | 26   | 2581  | 2579  | 0   | 48  | 65  | 1295  | 374 | 85  | 320  | 954  | 253  | 38   | 78  | 380 |     |
| 53931 | 55944 | 55957 | Phosphoglucuronase, C-terminal domain                                               | 12593 | 940  | 7353   | 939  | 16  | 43   | 43   | 34   | 22   | 3847  | 3846  | 0   | 16  | 69  | 2887  | 88  | 88  | 278  | 1947 | 429  | 134  | 44  | 419 |     |
| 53931 | 55944 | 55961 | Bet v1-like                                                                         | 60062 | 887  | 32006  | 573  | 4   | 583  | 583  | 136  | 71   | 6696  | 6689  | 0   | 29  | 43  | 5511  | 133 | 215 | 323  | 3210 | 1226 | 571  | 71  | 389 |     |
| 53931 | 55972 | 55973 | S-adenosylmethionine synthase                                                       | 8326  | 751  | 8326   | 757  | 24  | 56   | 56   | 14   | 12   | 5321  | 5320  | 0   | 8   | 175 | 4353  | 10  | 157 | 363  | 1705 | 846  | 1500 | 53  | 329 |     |
| 53931 | 55978 | 55979 | DNA clamp                                                                           | 10594 | 1110 | 9836   | 1110 | 2   | 316  | 316  | 37   | 18   | 6784  | 6821  | 259 | 54  | 237 | 5356  | 363 | 84  | 239  | 2467 | 1030 | 1265 | 75  | 353 |     |
| 53931 | 56002 | 56003 | Molybdenum cofactor-binding domain                                                  | 11862 | 4172 | 11179  | 4058 | 105 | 131  | 131  | 58   | 55   | 4117  | 4111  | 0   | 25  | 102 | 3378  | 88  | 73  | 308  | 1878 | 783  | 485  | 18  | 234 |     |
| 53931 | 56013 | 56014 | Nitrite and sulfite reductase 4Fe-4S domain-like                                    | 18911 | 1358 | 10650  | 373  | 18  | 85   | 85   | 51   | 66   | 5358  | 5355  | 0   | 41  | 45  | 4704  | 130 | 103 | 4    | 2352 | 900  | 530  | 14  | 390 |     |
| 53931 | 56018 | 56019 | The spindle assembly checkpoint protein mad2                                        | 2788  | 840  | 967    | 750  | 42  | 68   | 68   | 6    | 5    | 674   | 673   | 0   | 0   | 0   | 0     | 0   | 0   | 0    | 69   | 240  | 0    | 0   | 16  | 316 |
| 53931 | 56023 | 56024 | Phospholipase D nuclease                                                            | 28971 | 709  | 18276  | 640  | 2   | 69   | 69   | 72   | 42   | 3821  | 3818  | 1   | 28  | 205 | 6935  | 206 | 65  | 266  | 3162 | 1216 | 1331 | 27  | 283 |     |
| 53931 | 56028 | 56029 | Monoxygenase (hydroxylase)/regulatory protein                                       | 6118  | 575  | 554    | 503  | 26  | 31   | 31   | 1    | 5    | 378   | 378   | 0   | 1   | 1   | 375   | 3   | 0   | 0    | 275  | 91   | 6    | 0   | 0   |     |
| 48724 | 56036 | 56037 | PhcT/TIS domain                                                                     | 10000 | 3371 | 7028   | 2806 | 16  | 18   | 18   | 16   | 45   | 3624  | 3623  | 0   | 9   | 215 | 3619  | 0   | 0   | 4    | 1141 | 493  | 1233 | 0   | 0   |     |
| 53931 | 56041 | 56042 | PurM C-terminal domain-like                                                         | 29709 | 1214 | 29349  | 1214 | 9   | 68   | 68   | 70   | 100  | 9359  | 9354  | 1   | 43  | 246 | 8209  | 309 | 69  | 278  | 4012 | 1357 | 1604 | 41  | 420 |     |
| 53931 | 56046 | 56047 | Ribosomal protein S8                                                                | 6225  | 1722 | 6218   | 208  | 79  | 466  | 466  | 10   | 12   | 5045  | 5042  | 0   | 41  | 281 | 4094  | 311 | 65  | 191  | 1356 | 752  | 1151 | 62  | 265 |     |
| 53931 | 56052 | 56053 | Ribosomal protein L6                                                                | 10346 | 636  | 10304  | 633  | 115 | 453  | 453  | 20   | 19   | 7585  | 7582  | 0   | 49  | 301 | 6278  | 341 | 89  | 327  | 2303 | 976  | 1449 | 100 | 364 |     |
| 53931 | 56058 | 56059 | Glutathione synthase ATP-binding domain-like                                        | 87415 | 1015 | 78500  | 976  | 19  | 398  | 398  | 287  | 338  | 13948 | 13772 | 5   | 202 | 556 | 10271 | 496 | 128 | 2180 | 4356 | 1574 | 2466 | 100 | 513 |     |
| 53931 | 56058 | 56091 | DNA ligase/mRNA capping enzyme, catalytic domain                                    | 23207 | 936  | 19532  | 431  | 7   | 84   | 84   | 133  | 60   | 6962  | 6682  | 278 | 28  | 50  | 5318  | 356 | 73  | 328  | 2526 | 1039 | 1068 | 72  | 483 |     |
| 53931 | 56103 | 56104 | SAICAR synthase-like                                                                | 18509 | 0    | 11765  | 0    | 0   | 84   | 84   | 53   | 29   | 6265  | 6248  | 15  | 24  | 188 | 5343  | 134 | 46  | 281  | 2140 | 1109 | 1422 | 25  | 403 |     |
| 53931 | 56111 | 56112 | Protein kinase-like (PK-like)                                                       | 62948 | 3675 | 136998 | 3649 | 484 | 4236 | 4236 | 1974 | 1866 | 7712  | 7573  | 59  | 18  | 205 | 5723  | 184 | 272 | 549  | 2506 | 1309 | 1677 | 112 | 654 |     |
| 53931 | 56175 | 56176 | FAD-binding/transporter-associated domain-like                                      | 16766 | 1098 | 48783  | 1075 | 4   | 266  | 266  | 147  | 119  | 10516 | 10507 | 0   | 45  | 356 | 976   | 175 | 588 | 303  | 4285 | 1176 | 1688 | 28  | 421 |     |
| 53931 | 56193 | 56194 | Uridine diphospho-N-Acetylenolpyruvylglucosylase cyclotase, MurB, C-terminal domain | 10000 | 1309 | 9097   | 833  | 7   | 14   | 14   | 12   | 17   | 5728  | 5728  | 0   | 11  | 264 | 5690  | 6   | 17  | 4    | 2632 | 493  | 1493 | 0   | 11  |     |
| 53931 | 56198 | 56199 | Methylethyltetrahydropterocyclase                                                   | 589   | 550  | 502    | 0    | 13  | 13   | 13   | 3    | 4    | 426   | 426   | 0   | 11  | 12  | 322   | 194 | 0   | 0    | 185  | 1    | 18   | 0   | 0   |     |
| 53931 | 56203 | 56204 | Hect, E3 ligase catalytic domain                                                    | 6548  | 1700 | 6539   | 1644 | 7   | 25   | 25   | 117  | 92   | 801   | 800   | 0   | 0   | 0   | 0     | 0   | 0   | 64   | 281  | 0    | 0    | 32  | 404 |     |
| 53931 | 56208 | 56209 | Nitrite hydrolase alpha chain                                                       | 1451  | 921  | 1083   | 872  | 93  | 94   | 94   | 3    | 6    | 707   | 706   | 0   | 5   | 5   | 697   | 5   | 1   | 0    | 475  | 183  | 11   | 2   | 0   |     |
| 53931 | 56213 | 56214 | 4'-phosphatomeyl transferase                                                        | 11219 | 883  | 7711   | 880  | 31  | 60   | 60   | 20   | 19   | 4639  | 4637  | 0   | 13  | 117 | 4288  | 6   | 55  | 184  | 3041 | 244  | 1421 | 10  | 86  |     |
| 53931 | 56218 | 56219 | DNase I-like                                                                        | 43219 | 884  | 31308  | 200  | 2   | 205  | 206  | 216  | 94   | 8455  | 8448  | 4   | 19  | 275 | 7329  | 123 | 79  | 303  | 3383 | 793  | 1955 | 58  | 498 |     |
| 53931 | 56227 | 56228 | Aldehyde ferredoxin oxidoreductase, N-terminal domain                               | 2730  | 1183 | 2487   | 1    | 1   | 10   | 10   | 10   | 6    | 8     | 865   | 865 | 0   | 18  | 33    | 653 | 212 | 0    | 0    | 326  | 37   | 180 | 0   | 0   |
| 53931 | 56234 | 56235 | N-terminal nucleophilic amino acid hydrolases (Ntn hydrolases)                      | 82083 | 871  | 69250  | 854  | 268 | 4799 | 4799 | 206  | 126  | 11130 | 11099 | 26  | 149 | 435 | 9479  | 456 | 132 | 386  | 454  | 1403 | 2052 | 87  | 496 |     |
| 53931 | 56265 | 56266 | DmpA/ArgJ-like                                                                      | 10000 | 1757 | 7329   | 1271 | 60  | 50   | 74   | 12   | 10   | 4376  | 4373  | 0   | 18  | 157 | 4083  | 54  | 12  | 3    | 1993 | 285  | 1256 | 0   | 214 |     |
| 53931 | 56270 | 56271 | Pyruvyl-dependent histidine and arginine decarboxylases                             | 807   | 696  | 381    | 0    | 84  | 84   | 84   | 2    | 4    | 295   | 294   | 0   | 6   | 10  | 136   | 158 | 0   | 0    | 26   | 8    | 65   | 0   | 0   |     |
| 53931 | 56275 | 56276 | S-adenosylmethionine decarboxylase                                                  | 5385  | 843  | 5217   | 833  | 12  | 75   | 75   | 15   | 8    | 2206  | 2188  | 15  | 18  | 39  | 1521  | 130 | 129 | 192  | 549  | 112  | 499  | 19  | 156 |     |
| 53931 | 56280 | 56281 | Metallo-hydroxaldehyde oxidoreductase                                               | 87852 | 3581 | 58791  | 3256 | 21  | 513  | 513  | 199  | 104  | 11177 | 11167 | 5   | 111 | 464 | 9823  | 421 | 78  | 278  | 4049 | 1451 | 2260 | 72  | 442 |     |
| 53931 | 56299 | 56300 | Metallo-dependent phosphatases                                                      | 71174 | 3951 | 48483  | 2079 | 23  | 320  | 334  | 528  | 123  | 9938  | 9886  | 45  | 75  | 394 | 8354  | 389 | 137 | 347  | 3521 | 260  | 2230 | 86  | 517 |     |
| 53931 | 56316 | 56317 | Carbon-nitrogen hydrolase                                                           | 10713 | 1592 | 10700  | 1557 | 4   | 56   | 56   | 29   | 35   | 5320  | 5285  | 34  | 14  | 125 | 4400  | 84  | 107 | 266  | 2474 | 508  | 657  | 23  | 370 |     |
| 53931 | 56321 | 56322 | ADC synthase                                                                        | 15687 | 637  | 13593  | 637  | 4   | 57   | 57   | 17   | 20   | 5261  | 5260  | 0   | 15  | 106 | 5065  | 125 | 45  | 3    | 2636 | 903  | 1110 | 5   | 15  |     |
| 53931 | 56326 | 56327 | LDH C-terminal domain-like                                                          | 22848 | 809  | 20421  | 804  | 109 | 594  | 594  | 35   | 26   | 7647  | 7642  | 0   | 35  | 203 | 6125  | 207 | 148 | 601  | 2375 | 1119 | 1476 | 88  | 387 |     |
| 53931 | 56348 | 56349 | DNA breaking-rejoining enzyme                                                       | 26503 | 1794 | 23198  | 1145 | 58  | 110  | 110  | 57   | 31   | 9079  | 8968  | 90  | 54  | 317 | 7913  | 162 | 84  | 308  | 3880 | 1005 | 1484 | 61  | 401 |     |
| 53931 | 56365 | 56366 | SMAD MH1 domain                                                                     | 2438  | 942  | 1957   | 809  | 4   | 10   | 10   | 8    | 10   | 297   | 296   | 0   | 0   | 0   | 0     | 0   | 0   | 0    | 296  | 0    | 0    | 0   | 0   |     |
| 53931 | 56370 | 56371 | Ribosome inactivating proteins (RIP)                                                | 1418  | 776  | 976    | 466  | 207 | 258  | 258  | 11   | 14   | 189   | 180   | 6   | 0   | 0   | 81    | 0   | 90  | 1    | 35   | 40   | 0    | 0   | 8   |     |
| 53931 | 56398 | 56399 | ADP-ribosylation                                                                    | 16353 | 814  | 8402   | 647  | 55  | 636  | 636  | 179  | 93   | 3463  | 3442  | 15  | 17  | 51  | 2594  | 133 | 64  | 280  | 1112 | 649  | 484  | 37  | 299 |     |
| 53931 | 56419 | 56420 | Peptide deformylase                                                                 | 9308  | 690  | 9308   | 686  | 18  | 154  | 154  | 5    | 10   | 5498  | 5496  | 0   | 18  | 157 | 5490  | 2   | 62  | 1    | 2680 | 619  | 1079 | 19  | 0   |     |
| 53931 | 56424 | 56425 | Succinate dehydrogenase/fumarate reductase                                          |       |      |        |      |     |      |      |      |      |       |       |     |     |     |       |     |     |      |      |      |      |     |     |     |







|       |        |        |                                                                       |       |      |       |      |     |     |     |     |     |      |      |     |    |     |      |     |     |     |      |      |      |     |     |     |   |
|-------|--------|--------|-----------------------------------------------------------------------|-------|------|-------|------|-----|-----|-----|-----|-----|------|------|-----|----|-----|------|-----|-----|-----|------|------|------|-----|-----|-----|---|
| 53931 | 88797  | 88798  | N-terminal, heterodimerization domain of RBP7 (RpoE)                  | 1946  | 1486 | 1859  | 1    | 83  | 83  | 83  | 29  | 22  | 1088 | 1087 | 0   | 27 | 33  | 0    | 316 | 77  | 249 | 0    | 0    | 0    | 0   | 66  | 356 |   |
| 53931 | 54402  | 88802  | Pre-PUA domain                                                        | 1497  | 580  | 990   | 551  | 2   | 15  | 15  | 16  | 11  | 824  | 824  | 0   | 1  | 5   | 0    | 152 | 66  | 203 | 0    | 0    | 0    | 0   | 51  | 310 |   |
| 53931 | 88873  | 88874  | Receptor-binding domain of short tail fibre protein gp12              | 5000  | 2516 | 80    | 85   | 20  | 22  | 23  | 6   | 5   | 69   | 23   | 46  | 1  | 1   | 23   | 0   | 0   | 0   | 14   | 1    | 3    | 0   | 0   | 0   |   |
| 46456 | 88945  | 88946  | Signet-ring domain of RNA polymerase sigma factors                    | 20540 | 2675 | 15498 | 221  | 49  | 105 | 105 | 42  | 21  | 5972 | 5958 | 0   | 24 | 122 | 5952 | 2   | 1   | 1   | 2824 | 1435 | 848  | 0   | 2   | 0   |   |
| 46456 | 46928  | 89000  | post-HMGL domain-like                                                 | 10313 | 1408 | 8926  | 1390 | 6   | 41  | 41  | 19  | 16  | 4062 | 4061 | 0   | 6  | 156 | 3936 | 119 | 1   | 5   | 1428 | 1240 | 1049 | 0   | 0   | 0   |   |
| 46456 | 46965  | 89009  | GAT-like domain                                                       | 9007  | 902  | 7084  | 899  | 1   | 25  | 25  | 35  | 29  | 804  | 803  | 0   | 0  | 0   | 0    | 0   | 73  | 277 | 0    | 0    | 0    | 0   | 6   | 453 |   |
| 46456 | 47239  | 89028  | Cobalamin adenosyltransferase-like                                    | 5317  | 1628 | 5316  | 1621 | 26  | 39  | 42  | 7   | 9   | 3752 | 3749 | 0   | 19 | 66  | 3439 | 136 | 4   | 151 | 1533 | 667  | 542  | 6   | 7   | 0   |   |
| 46456 | 89042  | 89043  | Soluble domain of polyoxin core protein 3a                            | 2142  | 692  | 2092  | 493  | 2   | 2   | 2   | 25  | 20  | 261  | 0    | 260 | 0  | 0   | 0    | 0   | 0   | 0   | 0    | 0    | 0    | 0   | 0   | 0   | 0 |
| 46456 | 89063  | 89064  | Replicase organizer (g39p helicase loader/inhibitor protein)          | 3     | 256  | 3     | 19   | 3   | 3   | 3   | 2   | 4   | 16   | 14   | 2   | 0  | 0   | 0    | 14  | 0   | 0   | 0    | 0    | 0    | 0   | 14  | 0   |   |
| 46456 | 89068  | 89069  | N-terminal, cytoplasmic domain of anti-sigma factor RseA              | 2021  | 595  | 1623  | 589  | 2   | 2   | 2   | 4   | 5   | 948  | 948  | 0   | 0  | 0   | 946  | 0   | 1   | 0   | 943  | 0    | 0    | 2   | 0   | 1   |   |
| 46456 | 89081  | 89082  | Antibiotic binding domain of TPA-like multidrug resistance regulators | 3864  | 593  | 2227  | 590  | 3   | 4   | 4   | 6   | 5   | 1357 | 1357 | 0   | 0  | 12  | 1356 | 0   | 0   | 0   | 0    | 0    | 0    | 702 | 625 | 0   |   |
| 46456 | 89094  | 89095  | GaB/YqyY motif                                                        | 10066 | 0    | 10067 | 0    | 0   | 40  | 40  | 5   | 13  | 5463 | 5461 | 0   | 14 | 164 | 5337 | 56  | 61  | 2   | 2474 | 509  | 1262 | 3   | 0   | 0   |   |
| 46456 | 89123  | 89124  | Nop domain                                                            | 3611  | 2629 | 3216  | 0    | 33  | 34  | 34  | 23  | 15  | 1222 | 1221 | 0   | 23 | 25  | 3    | 263 | 77  | 283 | 1    | 0    | 0    | 0   | 78  | 460 |   |
| 46456 | 89154  | 89155  | Trd-like                                                              | 8351  | 702  | 3711  | 609  | 15  | 25  | 25  | 7   | 7   | 1179 | 1178 | 0   | 4  | 6   | 1137 | 40  | 0   | 0   | 991  | 63   | 54   | 0   | 1   | 0   |   |
| 46456 | 89161  | 89162  | Gametocyte protein Pfg27                                              | 22    | 22   | 20    | 0    | 1   | 1   | 1   | 1   | 4   | 17   | 17   | 0   | 0  | 0   | 0    | 0   | 0   | 0   | 0    | 0    | 0    | 0   | 17  | 0   |   |
| 48724 | 89231  | 89232  | Hypothetical protein TM1070                                           | 299   | 302  | 287   | 0    | 25  | 25  | 25  | 1   | 4   | 204  | 204  | 0   | 0  | 0   | 194  | 10  | 0   | 0   | 59   | 26   | 66   | 0   | 0   | 0   |   |
| 48724 | 49853  | 89260  | Collagen-binding domain                                               | 876   | 885  | 878   | 803  | 8   | 14  | 14  | 30  | 15  | 174  | 174  | 0   | 0  | 0   | 174  | 0   | 0   | 0   | 20   | 0    | 139  | 0   | 0   | 0   |   |
| 48724 | 89259  | 89260  | His-B-like domain                                                     | 8273  | 790  | 7786  | 790  | 6   | 12  | 12  | 17  | 25  | 4390 | 4387 | 0   | 50 | 54  | 3683 | 64  | 73  | 210 | 2232 | 553  | 527  | 14  | 334 | 0   |   |
| 48724 | 50938  | 89372  | Fucose-specific lectin                                                | 5000  | 828  | 3     | 39   | 30  | 4   | 30  | 3   | 5   | 35   | 35   | 0   | 0  | 0   | 0    | 0   | 0   | 0   | 0    | 0    | 0    | 0   | 0   | 35  |   |
| 48724 | 89391  | 89392  | Prokaryotic lipoproteins and lipoprotein localization factors         | 11017 | 721  | 5425  | 706  | 17  | 33  | 33  | 10  | 9   | 2257 | 2256 | 0   | 5  | 10  | 2248 | 2   | 2   | 2   | 2065 | 125  | 3    | 0   | 1   | 0   |   |
| 48724 | 89427  | 89428  | Adsorption protein p2                                                 | 8     | 8    | 8     | 0    | 2   | 2   | 2   | 1   | 4   | 6    | 0    | 6   | 0  | 0   | 0    | 0   | 0   | 0   | 0    | 0    | 0    | 0   | 0   | 0   | 0 |
| 48724 | 89432  | 89433  | Basoplast structural protein gp8                                      | 156   | 157  | 66    | 66   | 0   | 26  | 26  | 26  | 1   | 4    | 63   | 1   | 62 | 0   | 0    | 1   | 0   | 0   | 0    | 1    | 1    | 0   | 0   | 0   |   |
| 48724 | 89441  | 89442  | Hypothetical protein Yojf                                             | 533   | 509  | 525   | 0    | 1   | 1   | 1   | 2   | 5   | 378  | 378  | 0   | 0  | 0   | 378  | 0   | 0   | 0   | 0    | 0    | 0    | 0   | 376 | 0   |   |
| 48724 | 89446  | 89447  | AbrB/MaZ/MuZ-like                                                     | 9188  | 1513 | 8649  | 1505 | 18  | 45  | 45  | 11  | 5   | 4665 | 4658 | 3   | 13 | 251 | 4651 | 6   | 0   | 1   | 1379 | 728  | 1622 | 0   | 0   | 0   |   |
| 51349 | 51988  | 89550  | PHP domain-like                                                       | 10218 | 1311 | 4752  | 287  | 8   | 26  | 26  | 25  | 12  | 2697 | 2696 | 0   | 12 | 97  | 2459 | 236 | 0   | 0   | 653  | 473  | 910  | 0   | 1   | 0   |   |
| 51349 | 52008  | 89562  | RNA-like                                                              | 3000  | 1051 | 4996  | 1040 | 6   | 31  | 31  | 8   | 11  | 2626 | 2626 | 0   | 6  | 17  | 2528 | 11  | 75  | 2   | 1644 | 555  | 270  | 7   | 1   | 0   |   |
| 51349 | 89622  | 89623  | Ribose/Galactose isomerase RpiB/AlsB                                  | 5533  | 2919 | 5528  | 2898 | 49  | 65  | 65  | 12  | 13  | 4039 | 4039 | 0   | 14 | 271 | 4001 | 9   | 0   | 2   | 745  | 1014 | 1244 | 2   | 0   | 0   |   |
| 51349 | 89732  | 89733  | L-sulfolactate dehydrogenase-like                                     | 5554  | 1067 | 5518  | 995  | 15  | 50  | 50  | 12  | 9   | 2422 | 2420 | 0   | 8  | 47  | 2075 | 62  | 0   | 97  | 1209 | 158  | 488  | 3   | 172 | 0   |   |
| 51349 | 89795  | 89796  | CoA-transferase family III (CaIB/BaIF)                                | 11765 | 2381 | 11735 | 2334 | 14  | 61  | 75  | 16  | 17  | 4036 | 4034 | 0   | 11 | 23  | 3404 | 89  | 1   | 231 | 2005 | 915  | 333  | 6   | 296 | 0   |   |
| 53931 | 88797  | 89807  | Dodecin-like                                                          | 1983  | 870  | 1798  | 866  | 112 | 124 | 124 | 1   | 4   | 1390 | 1389 | 0   | 4  | 12  | 1324 | 65  | 0   | 0   | 689  | 439  | 38   | 0   | 0   | 0   |   |
| 53931 | 88797  | 89811  | Amyloid beta 41 protein copper binding domain (domain 2)              | 1706  | 697  | 1684  | 0    | 13  | 27  | 27  | 36  | 20  | 255  | 254  | 0   | 0  | 0   | 0    | 0   | 0   | 254 | 0    | 0    | 0    | 0   | 0   | 0   | 0 |
| 53931 | 89816  | 89817  | Mago nashi protein                                                    | 749   | 613  | 680   | 0    | 17  | 17  | 17  | 8   | 573 | 573  | 0    | 0   | 0  | 0   | 0    | 0   | 0   | 75  | 177  | 0    | 0    | 0   | 51  | 237 |   |
| 53931 | 54235  | 89837  | Doublecortin (DC)                                                     | 2888  | 910  | 2542  | 883  | 4   | 8   | 8   | 47  | 24  | 309  | 308  | 0   | 0  | 0   | 0    | 0   | 0   | 276 | 0    | 0    | 0    | 0   | 23  | 2   |   |
| 53931 | 89871  | 89872  | Inhibitor of vertebrate lysozyme, Iyv                                 | 1049  | 769  | 697   | 0    | 8   | 8   | 8   | 1   | 4   | 323  | 322  | 0   | 0  | 0   | 322  | 0   | 0   | 0   | 320  | 1    | 1    | 0   | 0   | 0   |   |
| 53931 | 89889  | 89890  | Proguanin                                                             | 302   | 302  | 297   | 0    | 1   | 1   | 1   | 2   | 4   | 167  | 167  | 0   | 0  | 0   | 0    | 0   | 0   | 167 | 0    | 0    | 0    | 0   | 0   | 0   | 0 |
| 53931 | 89894  | 89895  | FYSH domain                                                           | 1591  | 1327 | 1283  | 0    | 7   | 7   | 7   | 10  | 10  | 983  | 982  | 0   | 35 | 39  | 2    | 304 | 55  | 189 | 1    | 0    | 0    | 53  | 350 | 0   |   |
| 53931 | 89914  | 89915  | DNA-binding protein Tfx                                               | 179   | 1304 | 172   | 167  | 1   | 1   | 1   | 3   | 4   | 149  | 149  | 0   | 4  | 5   | 0    | 149 | 0   | 0   | 0    | 0    | 0    | 0   | 0   | 0   | 0 |
| 53931 | 54805  | 89919  | Ribosome-binding factor A, RbFA                                       | 5617  | 1454 | 5615  | 1423 | 1   | 4   | 4   | 5   | 6   | 4830 | 4829 | 0   | 11 | 236 | 4555 | 1   | 52  | 220 | 1705 | 877  | 1340 | 1   | 0   | 0   |   |
| 53931 | 54861  | 89942  | eEF1-gamma domain                                                     | 1575  | 867  | 1114  | 6    | 1   | 1   | 1   | 18  | 14  | 790  | 789  | 0   | 0  | 0   | 0    | 68  | 254 | 0   | 0    | 0    | 0    | 0   | 56  | 372 |   |
| 53931 | 54861  | 89946  | Hypothetical protein VC0424                                           | 1847  | 645  | 922   | 336  | 1   | 1   | 1   | 3   | 5   | 569  | 569  | 0   | 1  | 2   | 568  | 0   | 0   | 0   | 526  | 0    | 14   | 1   | 0   | 0   |   |
| 53931 | 54861  | 89957  | MTIH1/187/YkoF-like                                                   | 3671  | 798  | 3591  | 772  | 1   | 35  | 35  | 10  | 8   | 2547 | 2547 | 0   | 7  | 34  | 2066 | 200 | 0   | 0   | 289  | 902  | 671  | 2   | 278 | 0   |   |
| 53931 | 54861  | 89963  | YauQ-like                                                             | 3950  | 904  | 3905  | 897  | 2   | 2   | 2   | 1   | 5   | 2883 | 2882 | 0   | 5  | 29  | 2881 | 0   | 0   | 0   | 1380 | 807  | 366  | 1   | 0   | 0   |   |
| 53931 | 100886 | 89975  | Hypothetical protein Yml108w                                          | 55    | 55   | 34    | 0    | 1   | 1   | 1   | 1   | 4   | 33   | 33   | 0   | 0  | 0   | 0    | 0   | 0   | 0   | 0    | 0    | 0    | 0   | 0   | 33  | 0 |
| 53931 | 90001  | 90002  | Hypothetical protein YJia, C-terminal domain                          | 5000  | 572  | 3483  | 566  | 5   | 5   | 5   | 12  | 11  | 1622 | 1622 | 0   | 2  | 6   | 1515 | 0   | 72  | 9   | 1209 | 33   | 81   | 13  | 3   | 0   |   |
| 53931 | 90063  | 90064  | Hypothetical protein TM0875                                           | 7     | 7    | 7     | 0    | 1   | 1   | 1   | 1   | 4   | 4    | 0    | 0   | 0  | 0   | 0    | 0   | 0   | 0   | 0    | 0    | 0    | 0   | 0   | 0   | 0 |
| 53931 | 90072  | 90073  | GCM domain                                                            | 673   | 539  | 490   | 0    | 1   | 1   | 1   | 2   | 5   | 247  | 247  | 0   | 0  | 0   | 0    | 0   | 0   | 245 | 0    | 0    | 0    | 0   | 0   | 0   | 0 |
| 56272 | 90095  | 90096  | Subunits of heterodimeric actin filament capping protein Capz         | 2284  | 1193 | 1997  | 1121 | 62  | 64  | 64  | 19  | 17  | 802  | 801  | 0   | 0  | 0   | 0    | 0   | 61  | 283 | 0    | 0    | 0    | 53  | 381 | 2   |   |
| 56835 | 90111  | 90112  | Neurotransmitter-gated ion-channel transmembrane pore                 | 5106  | 1892 | 4969  | 1889 | 63  | 77  | 78  | 21  | 41  | 333  | 332  | 0   | 0  | 0   | 0    | 0   | 0   | 332 | 0    | 0    | 0    | 0   | 0   | 0   | 0 |
| 56835 | 90122  | 90123  | ABC transporter transmembrane region                                  | 8455  | 1585 | 8454  | 1539 | 30  | 34  | 34  | 8   | 41  | 3993 | 3991 | 0   | 8  | 129 | 3981 | 5   | 2   | 2   | 1699 | 724  | 1337 | 0   | 1   | 0   |   |
| 56992 | 57015  | 90148  | DPY module                                                            | 0     | 58   | 0     | 58   | 1   | 0   | 1   | 19  | 52  | 34   | 34   | 0   | 0  | 0   | 0    | 0   | 0   | 1   | 33   | 0    | 0    | 0   | 0   | 0   | 0 |
| 56992 | 90182  | 90183  | Mollusk pheromone                                                     | 4     | 6    | 4     | 2    | 1   | 1   | 1   | 1   | 4   | 5    | 5    | 0   | 0  | 0   | 0    | 0   | 0   | 5   | 0    | 0    | 0    | 0   | 0   | 0   | 0 |
| 56992 | 90187  | 90188  | Somatostatin B domain                                                 | 675   | 642  | 574   | 23   | 7   | 0   | 7   | 26  | 16  | 169  | 169  | 0   | 0  | 0   | 0    | 0   | 0   | 169 | 0    | 0    | 0    | 0   | 0   | 0   | 0 |
| 56992 | 90192  | 90193  | Notch domain                                                          | 115   | 810  | 111   | 187  | 9   | 6   | 9   | 163 | 46  | 124  | 124  | 0   | 0  | 0   | 0    | 0   | 0   | 124 | 0    | 0    | 0    | 0   | 0   | 0   | 0 |
| 56992 | 57769  | 90209  | Ran binding protein zinc finger-like                                  | 3803  | 1157 | 2924  | 950  | 1   | 7   | 7   | 85  | 120 | 497  | 496  | 0   | 0  | 0   | 0    | 0   | 60  | 256 | 0    | 0    | 0    | 19  | 158 | 0   |   |
| 56992 | 90228  | 90229  | CCHC zinc finger                                                      | 2703  | 636  | 2696  | 630  | 1   | 1   | 2   | 42  | 66  | 710  | 709  | 0   | 0  | 0   | 0    | 0   | 0   | 70  | 419  | 0    | 0    | 0   | 26  | 163 |   |
| 56992 | 90233  | 90234  | Zinc finger domain of DNA polymerase-alpha                            | 250   | 282  | 250   | 24   | 7   | 4   | 7   | 8   | 5   | 181  | 181  | 0   | 0  | 0   | 0    | 0   | 0   | 181 | 0    | 0    | 0    | 0   | 0   | 0   | 0 |
| 53931 | 100878 | 100879 | Lesion bypass DNA polymerase (Y-family), little finger domain         | 14111 | 813  | 10153 | 138  | 71  | 138 | 138 | 32  | 19  | 5843 | 5841 | 0   | 12 | 161 | 5100 | 81  | 62  | 219 | 2053 | 1024 | 1120 | 21  | 349 | 0   |   |
| 56992 | 100894 | 100895 |                                                                       |       |      |       |      |     |     |     |     |     |      |      |     |    |     |      |     |     |     |      |      |      |     |     |     |   |



|       |        |        |                                                                   |       |      |       |      |    |    |     |      |      |      |      |     |    |      |      |     |     |     |      |      |      |     |     |     |   |
|-------|--------|--------|-------------------------------------------------------------------|-------|------|-------|------|----|----|-----|------|------|------|------|-----|----|------|------|-----|-----|-----|------|------|------|-----|-----|-----|---|
| 48724 | 50875  | 101874 | YcoI-like                                                         | 5569  | 1432 | 5564  | 1431 | 5  | 6  | 6   | 4    | 8    | 3099 | 3099 | 0   | 7  | 9    | 3094 | 5   | 0   | 0   | 0    | 1615 | 909  | 227 | 0   | 0   | 0 |
| 48724 | 50933  | 101887 | Apurase                                                           | 734   | 632  | 533   | 0    | 8  | 8  | 8   | 9    | 9    | 301  | 300  | 0   | 0  | 0    | 7    | 0   | 0   | 0   | 249  | 7    | 0    | 0   | 0   | 29  | 0 |
| 48724 | 50938  | 101898 | NHL repeat                                                        | 24149 | 2812 | 2733  | 1031 | 25 | 67 | 302 | 64   | 954  | 953  | 0    | 10  | 12 | 639  | 27   | 1   | 265 | 178 | 193  | 63   | 15   | 1   | 0   | 0   |   |
| 48724 | 50938  | 101904 | GyrA/PurC-terminal domain-like                                    | 6267  | 3492 | 6265  | 3251 | 2  | 3  | 4   | 22   | 17   | 4365 | 4364 | 0   | 10 | 154  | 4270 | 90  | 0   | 3   | 1830 | 768  | 1374 | 0   | 1   | 0   |   |
| 48724 | 50964  | 101908 | Putative isomerase YbhE                                           | 5000  | 606  | 3659  | 585  | 1  | 8  | 8   | 2    | 7    | 1660 | 1659 | 0   | 1  | 20   | 1640 | 8   | 0   | 2   | 729  | 188  | 431  | 5   | 3   | 0   |   |
| 48724 | 50964  | 101912 | Sema domain                                                       | 8009  | 1248 | 6773  | 932  | 23 | 37 | 78  | 34   | 263  | 262  | 0    | 0   | 0  | 0    | 0    | 0   | 0   | 0   | 262  | 0    | 0    | 0   | 0   | 0   |   |
| 48724 | 51044  | 101931 | Pym (Within the bcn gene intron protein, WIBG), N-terminal domain | 250   | 640  | 247   | 383  | 1  | 1  | 1   | 3    | 6    | 287  | 287  | 0   | 0  | 0    | 0    | 0   | 0   | 0   | 190  | 0    | 0    | 0   | 22  | 52  |   |
| 48724 | 101935 | 101936 | DNA-binding pseudobulb domain                                     | 7089  | 999  | 5678  | 886  | 1  | 15 | 15  | 52   | 24   | 258  | 257  | 0   | 1  | 5    | 119  | 0   | 138 | 0   | 86   | 0    | 0    | 14  | 0   | 0   |   |
| 48724 | 101940 | 101941 | NAC domain                                                        | 5000  | 799  | 4996  | 34   | 15 | 15 | 15  | 11   | 13   | 164  | 164  | 0   | 0  | 0    | 0    | 0   | 0   | 0   | 164  | 0    | 0    | 0   | 0   | 0   |   |
| 48724 | 51125  | 101960 | Stabilizer of iron transporter SuD                                | 5000  | 611  | 3035  | 610  | 4  | 4  | 4   | 2    | 5    | 1932 | 1932 | 0   | 5  | 23   | 1886 | 0   | 43  | 1   | 1257 | 27   | 2    | 0   | 0   | 1   |   |
| 48724 | 51160  | 101967 | Adhesin YaaC, collagen-binding domain                             | 5000  | 1460 | 4157  | 89   | 1  | 10 | 10  | 1327 | 19   | 1010 | 1007 | 3   | 1  | 9    | 1004 | 2   | 0   | 1   | 891  | 1    | 58   | 0   | 0   | 0   |   |
| 48724 | 101998 | 101999 | Trimeric adhesion                                                 | 182   | 212  | 55    | 0    | 9  | 9  | 9   | 38   | 12   | 18   | 18   | 0   | 0  | 0    | 18   | 0   | 0   | 0   | 17   | 0    | 1    | 0   | 0   | 0   |   |
| 48724 | 102030 | 102031 | AXH domain                                                        | 5000  | 696  | 842   | 679  | 18 | 23 | 23  | 3    | 8    | 227  | 227  | 0   | 0  | 0    | 2    | 0   | 0   | 0   | 225  | 0    | 0    | 0   | 0   | 0   |   |
| 51349 | 51350  | 102110 | (2r)-phospho-3-sulfatidate synthase ComA                          | 832   | 624  | 699   | 7    | 2  | 2  | 2   | 3    | 5    | 577  | 577  | 0   | 5  | 8    | 408  | 54  | 11  | 0   | 54   | 42   | 178  | 0   | 100 | 0   |   |
| 51349 | 51350  | 102114 | Radical SAM enzymes                                               | 3000  | 739  | 2148  | 718  | 8  | 11 | 11  | 32   | 21   | 7945 | 7940 | 0   | 42 | 120  | 6933 | 277 | 72  | 241 | 3753 | 1138 | 1076 | 29  | 374 | 0   |   |
| 51349 | 52008  | 102198 | Putative cyclase                                                  | 5392  | 1849 | 4260  | 1823 | 19 | 33 | 33  | 13   | 13   | 2599 | 2597 | 0   | 27 | 38   | 2231 | 234 | 65  | 16  | 786  | 403  | 670  | 0   | 48  | 0   |   |
| 51349 | 102214 | 102215 | Cranianase                                                        | 5000  | 1793 | 2982  | 1469 | 75 | 87 | 87  | 7    | 7    | 1837 | 1836 | 0   | 14 | 30   | 1707 | 124 | 2   | 0   | 906  | 237  | 271  | 1   | 0   | 0   |   |
| 51349 | 102219 | 102220 | DNA polymerase III psi subunit                                    | 984   | 576  | 849   | 553  | 3  | 3  | 3   | 2    | 4    | 411  | 411  | 0   | 0  | 0    | 410  | 0   | 0   | 1   | 409  | 0    | 0    | 0   | 0   | 0   |   |
| 51349 | 102323 | 102324 | F420-dependent methylenetetrahydropterin dehydrogenase (MTD)      | 107   | 108  | 103   | 0    | 54 | 54 | 54  | 1    | 4    | 92   | 92   | 0   | 2  | 4    | 0    | 92  | 0   | 0   | 0    | 0    | 0    | 0   | 0   | 0   | 0 |
| 51349 | 102399 | 102400 | DNA polymerase III chi subunit                                    | 3631  | 726  | 2584  | 694  | 3  | 3  | 3   | 6    | 1692 | 1691 | 0    | 5   | 8  | 1690 | 0    | 0   | 0   | 0   | 1679 | 2    | 1    | 1   | 0   | 0   |   |
| 51349 | 102404 | 102405 | MCP YpsA-like                                                     | 12801 | 859  | 11613 | 856  | 8  | 25 | 27  | 21   | 20   | 5866 | 5861 | 2   | 15 | 86   | 5548 | 23  | 79  | 2   | 2259 | 1084 | 1072 | 22  | 160 | 0   |   |
| 51349 | 102412 | 102414 | Alpha 2,3-sialyltransferase CstII                                 | 4952  | 2345 | 1977  | 197  | 15 | 15 | 15  | 1    | 6    | 41   | 41   | 0   | 0  | 0    | 41   | 0   | 0   | 0   | 0    | 41   | 0    | 0   | 0   | 0   | 0 |
| 51349 | 102461 | 102462 | Peptidyl-RNA hydrolase II                                         | 4587  | 1866 | 2629  | 1808 | 24 | 24 | 24  | 17   | 11   | 1955 | 1946 | 9   | 33 | 42   | 811  | 343 | 77  | 262 | 329  | 411  | 47   | 54  | 358 | 0   |   |
| 51349 | 102521 | 102522 | Bacterial fluorinating enzyme, N-terminal domain                  | 2573  | 1145 | 119   | 0    | 60 | 70 | 70  | 2    | 5    | 94   | 94   | 0   | 1  | 2    | 85   | 9   | 0   | 0   | 7    | 34   | 6    | 0   | 0   | 0   | 0 |
| 51349 | 102545 | 102546 | RbdD-like                                                         | 4678  | 2398 | 4476  | 3    | 48 | 86 | 86  | 3    | 7    | 2395 | 2394 | 0   | 4  | 51   | 2262 | 2   | 0   | 98  | 1056 | 354  | 742  | 8   | 8   | 0   |   |
| 51349 | 102587 | 102588 | LmbE-like                                                         | 13167 | 1891 | 5639  | 1    | 12 | 29 | 29  | 15   | 7    | 2718 | 2716 | 0   | 14 | 34   | 2644 | 71  | 0   | 1   | 299  | 1125 | 522  | 0   | 0   | 0   |   |
| 51349 | 53612  | 102645 | CoaB-like                                                         | 6255  | 1351 | 6128  | 617  | 12 | 12 | 12  | 11   | 11   | 3879 | 3873 | 4   | 11 | 158  | 3236 | 0   | 61  | 169 | 1528 | 80   | 1135 | 20  | 315 | 0   |   |
| 51349 | 102704 | 102705 | NIF3 (NGB1) interacting factor 3-like                             | 9365  | 774  | 9137  | 754  | 3  | 24 | 24  | 10   | 10   | 5938 | 5938 | 0   | 6  | 198  | 5342 | 124 | 0   | 232 | 1776 | 1058 | 1476 | 1   | 214 | 0   |   |
| 51349 | 53926  | 102712 | JAB1/MPN domain                                                   | 5000  | 1492 | 164   | 13   | 7  | 8  | 8   | 2    | 4    | 164  | 164  | 0   | 23 | 29   | 0    | 164 | 0   | 0   | 0    | 0    | 0    | 0   | 0   | 0   | 0 |
| 53931 | 100965 | 102735 | Trigger factor ribosome-binding domain                            | 5000  | 624  | 4920  | 618  | 14 | 14 | 14  | 8    | 10   | 3192 | 3190 | 0   | 6  | 71   | 3185 | 0   | 4   | 0   | 1508 | 797  | 868  | 0   | 1   | 0   |   |
| 53931 | 102740 | 102741 | Obg GTP-binding protein C-terminal domain                         | 4739  | 719  | 2272  | 709  | 1  | 1  | 1   | 4    | 7    | 1730 | 1730 | 0   | 1  | 129  | 1722 | 0   | 5   | 0   | 4    | 844  | 768  | 1   | 0   | 0   | 0 |
| 53931 | 54402  | 102816 | Putative dDNA mimic                                               | 688   | 512  | 666   | 0    | 1  | 1  | 1   | 1    | 4    | 400  | 400  | 0   | 0  | 0    | 400  | 0   | 0   | 0   | 399  | 0    | 1    | 0   | 0   | 0   | 0 |
| 53931 | 102823 | 102824 | Colicin DE5 nuclease domain                                       | 479   | 504  | 380   | 0    | 13 | 13 | 13  | 46   | 8    | 165  | 164  | 0   | 0  | 0    | 157  | 7   | 0   | 0   | 127  | 11   | 16   | 0   | 0   | 0   | 0 |
| 53931 | 102828 | 102829 | Cell division protein ZapA-like                                   | 1738  | 778  | 1326  | 0    | 8  | 8  | 8   | 1    | 4    | 957  | 956  | 0   | 4  | 6    | 955  | 1   | 0   | 0   | 951  | 0    | 0    | 0   | 0   | 0   | 0 |
| 53931 | 102847 | 102848 | NSFL1 (p97 ATPase) cofactor p47_SEP domain                        | 2196  | 612  | 1835  | 583  | 2  | 2  | 2   | 19   | 15   | 805  | 805  | 0   | 0  | 0    | 0    | 0   | 0   | 72  | 269  | 0    | 0    | 0   | 58  | 380 |   |
| 53931 | 102859 | 102860 | mRNA decapping enzyme DcpS N-terminal domain                      | 764   | 696  | 465   | 0    | 30 | 30 | 30  | 10   | 9    | 376  | 376  | 0   | 0  | 0    | 0    | 0   | 0   | 1   | 230  | 0    | 0    | 0   | 12  | 132 |   |
| 53931 | 102874 | 102875 | Chromosomal protein MCl1                                          | 194   | 218  | 182   | 6    | 2  | 2  | 2   | 3    | 4    | 138  | 125  | 13  | 9  | 9    | 0    | 125 | 0   | 0   | 0    | 0    | 0    | 0   | 0   | 0   | 0 |
| 53931 | 102885 | 102886 | Coproporphyrinogen III oxidase                                    | 5161  | 2379 | 5140  | 2338 | 24 | 24 | 24  | 8    | 9    | 3318 | 3316 | 0   | 7  | 9    | 2583 | 0   | 72  | 245 | 2047 | 5    | 4    | 30  | 356 | 0   |   |
| 53931 | 102890 | 102891 | Hypothetical protein Tai206                                       | 543   | 537  | 214   | 0    | 1  | 1  | 1   | 1    | 4    | 184  | 184  | 0   | 2  | 8    | 134  | 50  | 0   | 0   | 4    | 1    | 124  | 0   | 0   | 0   | 0 |
| 53931 | 54861  | 103007 | Hypothetical protein TT1725                                       | 1724  | 903  | 448   | 0    | 1  | 1  | 1   | 1    | 4    | 403  | 403  | 0   | 1  | 1    | 402  | 1   | 0   | 0   | 26   | 168  | 104  | 0   | 0   | 0   | 0 |
| 53931 | 103024 | 103025 | Folate-binding domain                                             | 19388 | 930  | 17441 | 921  | 4  | 49 | 49  | 41   | 47   | 6802 | 6798 | 0   | 24 | 274  | 6308 | 94  | 19  | 245 | 2585 | 720  | 1693 | 9   | 116 | 0   |   |
| 53931 | 103031 | 103032 | Hypothetical protein YwgG                                         | 2797  | 846  | 842   | 718  | 1  | 1  | 1   | 6    | 8    | 396  | 396  | 0   | 1  | 12   | 389  | 0   | 0   | 0   | 72   | 18   | 221  | 0   | 2   | 0   |   |
| 53931 | 103038 | 103039 | CheC-like                                                         | 6214  | 1943 | 3018  | 942  | 14 | 19 | 19  | 20   | 13   | 1609 | 1609 | 0   | 2  | 47   | 1470 | 139 | 0   | 0   | 415  | 8    | 861  | 0   | 0   | 0   | 0 |
| 53931 | 55185  | 103054 | General secretion pathway protein M_EpsM                          | 996   | 626  | 809   | 622  | 2  | 2  | 2   | 1    | 4    | 362  | 361  | 0   | 0  | 0    | 361  | 0   | 0   | 0   | 359  | 0    | 1    | 0   | 0   | 0   | 0 |
| 53931 | 103062 | 103063 | Hypothetical protein YoaG                                         | 238   | 239  | 235   | 0    | 2  | 2  | 2   | 4    | 6    | 102  | 102  | 0   | 0  | 0    | 101  | 0   | 0   | 0   | 100  | 0    | 1    | 0   | 0   | 1   | 0 |
| 53931 | 103067 | 103068 | Nucleosidiphosphate ribosyl transferase domain                    | 2331  | 548  | 2255  | 516  | 12 | 30 | 30  | 3    | 6    | 232  | 3    | 227 | 0  | 0    | 0    | 0   | 0   | 0   | 3    | 0    | 0    | 0   | 0   | 0   | 0 |
| 53931 | 55297  | 103084 | Holliday junction resolvase RusA                                  | 4755  | 867  | 1983  | 824  | 7  | 7  | 7   | 2    | 4    | 422  | 406  | 16  | 2  | 3    | 406  | 0   | 0   | 0   | 349  | 5    | 23   | 0   | 0   | 0   | 0 |
| 53931 | 55297  | 103088 | OmpA-like                                                         | 8290  | 1698 | 8243  | 1416 | 24 | 30 | 30  | 72   | 28   | 3335 | 3333 | 0   | 9  | 19   | 3331 | 0   | 0   | 1   | 2870 | 9    | 13   | 0   | 1   | 0   |   |
| 53931 | 55382  | 103107 | Hypothetical protein c14orf29_hspc210                             | 1506  | 931  | 321   | 0    | 1  | 1  | 1   | 2    | 5    | 216  | 216  | 0   | 0  | 0    | 0    | 0   | 0   | 0   | 215  | 0    | 0    | 0   | 0   | 0   | 0 |
| 53931 | 55393  | 103111 | Activator of Hsp90 ATPase, AhA1                                   | 1402  | 815  | 671   | 599  | 5  | 7  | 7   | 8    | 9    | 526  | 526  | 0   | 0  | 0    | 0    | 0   | 0   | 4   | 138  | 0    | 0    | 0   | 1   | 363 |   |
| 53931 | 103144 | 103145 | Tobusvirus P19 core protein, VP19                                 | 53    | 53   | 53    | 0    | 13 | 13 | 13  | 1    | 4    | 21   | 0    | 20  | 0  | 0    | 0    | 0   | 0   | 0   | 0    | 0    | 0    | 0   | 0   | 0   | 0 |
| 53931 | 103164 | 103165 | Tai353-like                                                       | 599   | 559  | 586   | 0    | 23 | 26 | 27  | 2    | 6    | 487  | 487  | 0   | 6  | 12   | 368  | 108 | 2   | 0   | 160  | 61   | 4    | 0   | 0   | 6   | 0 |
| 53931 | 55769  | 103190 | Sensory domain-like                                               | 11755 | 848  | 7157  | 303  | 6  | 44 | 44  | 108  | 34   | 2256 | 2254 | 0   | 0  | 2    | 3254 | 0   | 0   | 0   | 1012 | 590  | 614  | 0   | 0   | 0   | 0 |
| 53931 | 55769  | 103196 | Roadblock/LC7 domain                                              | 6635  | 1514 | 3258  | 899  | 14 | 48 | 48  | 26   | 17   | 1327 | 1326 | 0   | 5  | 5    | 852  | 49  | 11  | 272 | 182  | 539  | 0    | 55  | 51  | 0   |   |
| 53931 | 55944  | 103239 | MouD-related protein, C-terminal domain                           | 24    | 145  | 24    | 16   | 4  | 4  | 4   | 2    | 5    | 21   | 21   | 0   | 0  | 0    | 18   | 3   | 0   | 0   | 0    | 0    | 1    | 0   | 0   | 0   | 0 |
| 53931 | 55944  | 103243 | KAI-like                                                          | 4873  | 598  | 3981  | 597  | 2  | 41 | 41  | 32   | 13   | 573  | 572  | 0   | 0  | 0    | 1    | 0   | 71  | 278 | 1    | 0    | 0    | 19  | 188 | 0   |   |
| 53931 | 55944  | 103247 | TT1751-like                                                       | 3789  | 1373 | 2259  |      |    |    |     |      |      |      |      |     |    |      |      |     |     |     |      |      |      |     |     |     |   |

|       |        |        |                                                                |       |      |       |      |      |     |     |    |      |      |      |     |    |     |      |     |    |     |     |     |     |     |     |   |
|-------|--------|--------|----------------------------------------------------------------|-------|------|-------|------|------|-----|-----|----|------|------|------|-----|----|-----|------|-----|----|-----|-----|-----|-----|-----|-----|---|
| 48724 | 50964  | 110296 | Oligosaccharyl reducing end-specific cellobiohydrolase         | 5669  | 1261 | 1088  | 938  | 12   | 17  | 17  | 56 | 32   | 639  | 637  | 0   | 2  | 17  | 508  | 0   | 1  | 0   | 100 | 240 | 107 | 0   | 127 |   |
| 48724 | 110303 | 110304 | Coronavirus RNA-binding domain                                 | 1250  | 1419 | 813   | 529  | 1734 | 19  | 173 | 1  | 5    | 174  | 2    | 172 | 0  | 0   | 2    | 0   | 0  | 0   | 2   | 0   | 0   | 0   | 0   |   |
| 48724 | 51229  | 110324 | Ribosomal L27 protein-like                                     | 6727  | 1357 | 6276  | 1357 | 195  | 328 | 225 | 25 | 17   | 4779 | 4775 | 0   | 34 | 258 | 384  | 148 | 78 | 237 | 164 | 258 | 110 | 76  | 867 |   |
| 51349 | 51350  | 110391 | CtpA-like                                                      | 1754  | 1100 | 1675  | 0    | 12   | 12  | 12  | 1  | 4    | 996  | 996  | 0   | 0  | 33  | 996  | 0   | 0  | 0   | 101 | 45  | 782 | 0   | 0   |   |
| 51349 | 51350  | 110395 | CutC-like                                                      | 5000  | 803  | 4815  | 793  | 6    | 23  | 22  | 10 | 9    | 2738 | 2736 | 0   | 2  | 10  | 2423 | 0   | 0  | 210 | 845 | 288 | 76  | 5   | 823 |   |
| 51349 | 51350  | 110399 | ThG-like                                                       | 5000  | 1214 | 5000  | 1197 | 8    | 8   | 8   | 7  | 12   | 3340 | 3339 | 0   | 5  | 39  | 328  | 2   | 0  | 4   | 162 | 685 | 333 | 28  | 0   |   |
| 51349 | 110454 | 110455 | Torpin domain                                                  | 8261  | 2053 | 2426  | 762  | 8    | 16  | 18  | 10 | 7    | 1415 | 1415 | 0   | 15 | 51  | 126  | 148 | 0  | 0   | 1   | 1   | 1   | 137 | 0   |   |
| 51349 | 110580 | 110581 | Indigoin synthase A-like                                       | 3294  | 1988 | 3060  | 968  | 15   | 20  | 20  | 14 | 14   | 2156 | 2156 | 0   | 3  | 34  | 156  | 0   | 64 | 163 | 647 | 477 | 284 | 24  | 327 |   |
| 51349 | 110709 | 110710 | TTAHS83/YoD-like                                               | 3942  | 1583 | 3179  | 664  | 29   | 33  | 33  | 5  | 5    | 1745 | 1740 | 0   | 3  | 72  | 168  | 37  | 0  | 1   | 12  | 30  | 117 | 0   | 18  |   |
| 51349 | 110737 | 110738 | Glyceric kinase I                                              | 4171  | 1730 | 4141  | 50   | 4    | 4   | 4   | 2  | 8    | 1435 | 1434 | 0   | 0  | 39  | 143  | 0   | 0  | 0   | 758 | 19  | 61  | 0   | 0   |   |
| 53931 | 110783 | 110783 | Hypothetical protein MH677                                     | 1111  | 112  | 99    | 0    | 7    | 7   | 7   | 0  | 0    | 0    | 0    | 0   | 0  | 0   | 0    | 0   | 0  | 0   | 0   | 0   | 0   | 0   | 0   |   |
| 53931 | 54235  | 110814 | TrnG-like                                                      | 1111  | 112  | 99    | 0    | 39   | 39  | 39  | 1  | 4    | 83   | 83   | 0   | 0  | 0   | 83   | 0   | 0  | 0   | 0   | 53  | 25  | 2   | 0   | 0 |
| 53931 | 110835 | 110836 | Hypothetical protein SAV1430                                   | 3444  | 1347 | 968   | 714  | 5    | 7   | 7   | 14 | 6    | 511  | 511  | 0   | 2  | 3   | 497  | 1   | 0  | 10  | 30  | 1   | 456 | 0   | 1   |   |
| 53931 | 110848 | 110849 | ParB/Sulfoliduron                                              | 8967  | 659  | 8299  | 556  | 6    | 28  | 28  | 11 | 16   | 5238 | 5236 | 0   | 9  | 273 | 503  | 18  | 3  | 174 | 185 | 979 | 151 | 0   | 0   |   |
| 53931 | 110856 | 110857 | Gamma-glutamyl cyclotransferase-like                           | 10418 | 571  | 2955  | 504  | 5    | 10  | 10  | 17 | 10   | 1881 | 1862 | 18  | 6  | 11  | 1466 | 69  | 54 | 201 | 808 | 137 | 292 | 16  | 0   |   |
| 53931 | 54767  | 110916 | PepY/4-RNA hydrolyase domain                                   | 5000  | 1272 | 4578  | 1206 | 4    | 8   | 8   | 6  | 6    | 3529 | 3527 | 0   | 12 | 15  | 296  | 0   | 62 | 248 | 909 | 625 | 2   | 33  | 202 |   |
| 53931 | 110920 | 110921 | 2-isopropylmalate synthase (dimerisation) domain               | 5000  | 845  | 4843  | 4440 | 10   | 10  | 10  | 13 | 15   | 3278 | 3278 | 0   | 4  | 124 | 291  | 0   | 0  | 5   | 14  | 118 | 494 | 0   | 358 |   |
| 53931 | 110941 | 110942 | HSP90-C-terminal domain                                        | 5000  | 627  | 4996  | 617  | 14   | 14  | 14  | 5  | 11   | 2759 | 2759 | 0   | 12 | 34  | 272  | 0   | 0  | 6   | 207 | 409 | 143 | 0   | 13  |   |
| 53931 | 54861  | 110993 | eIF-2-alpha, C-terminal domain                                 | 1221  | 1138 | 1034  | 2    | 14   | 14  | 14  | 12 | 14   | 890  | 889  | 0   | 20 | 23  | 0    | 183 | 70 | 196 | 0   | 0   | 0   | 53  | 34  |   |
| 53931 | 54861  | 110997 | Spautulation related repeat                                    | 211   | 751  | 201   | 637  | 1    | 0   | 1   | 2  | 7    | 332  | 332  | 0   | 0  | 0   | 33   | 0   | 0  | 0   | 33  | 0   | 0   | 0   | 0   |   |
| 53931 | 111005 | 111006 | Dyotroglycan, domain 2                                         | 446   | 451  | 326   | 0    | 2    | 2   | 2   | 4  | 5    | 209  | 209  | 0   | 0  | 0   | 0    | 0   | 0  | 0   | 209 | 0   | 0   | 0   | 0   |   |
| 53931 | 111037 | 111038 | YjD-like                                                       | 5177  | 1157 | 5138  | 14   | 16   | 22  | 22  | 9  | 11   | 3512 | 3509 | 0   | 24 | 79  | 281  | 262 | 71 | 62  | 151 | 76  | 47  | 17  | 266 |   |
| 53931 | 111056 | 111057 | Hypothetical protein PF0899                                    | 41    | 41   | 39    | 0    | 1    | 1   | 1   | 1  | 4    | 22   | 22   | 0   | 0  | 0   | 0    | 22  | 0  | 0   | 0   | 0   | 0   | 0   | 0   |   |
| 53931 | 111061 | 111064 | Hut operon positive control protein HutP                       | 575   | 518  | 215   | 0    | 40   | 40  | 40  | 10 | 4    | 156  | 156  | 0   | 0  | 0   | 0    | 0   | 0  | 0   | 0   | 0   | 0   | 0   | 0   |   |
| 53931 | 111068 | 111069 | Hypothetical protein yBm                                       | 962   | 637  | 336   | 0    | 2    | 2   | 2   | 1  | 4    | 171  | 171  | 0   | 0  | 0   | 3    | 171 | 0  | 0   | 0   | 40  | 6   | 96  | 0   | 0 |
| 53931 | 111073 | 111074 | Bacillus phase protein                                         | 71    | 177  | 25    | 1    | 2    | 2   | 2   | 0  | 4    | 15   | 14   | 1   | 0  | 0   | 0    | 14  | 0  | 0   | 0   | 0   | 0   | 14  | 0   | 0 |
| 53931 | 111125 | 111126 | Ligand-binding domain in the NO signalling and Golgi transport | 7473  | 674  | 2741  | 673  | 12   | 109 | 106 | 38 | 19   | 1325 | 1324 | 0   | 1  | 1   | 475  | 27  | 73 | 273 | 245 | 2   | 114 | 58  | 369 |   |
| 53931 | 111147 | 111148 | YggX-like                                                      | 1865  | 800  | 1835  | 2    | 4    | 4   | 4   | 4  | 6    | 1359 | 1359 | 0   | 3  | 8   | 135  | 0   | 0  | 0   | 131 | 2   | 0   | 0   | 0   |   |
| 53931 | 55944  | 111171 | Rbs22/229 protein                                              | 227   | 228  | 225   | 0    | 1    | 1   | 1   | 1  | 5    | 145  | 143  | 0   | 0  | 0   | 143  | 0   | 0  | 0   | 0   | 0   | 0   | 143 | 0   |   |
| 53931 | 111248 | 111249 | Sulfobolus fructosus 6-phosphatase-like                        | 380   | 382  | 357   | 0    | 8    | 8   | 8   | 8  | 4    | 310  | 309  | 0   | 18 | 28  | 33   | 128 | 0  | 0   | 26  | 11  | 31  | 0   | 0   |   |
| 53931 | 111254 | 111265 | Hemolytic lectin CEI-III, C-terminal domain                    | 9     | 9    | 9     | 8    | 13   | 13  | 13  | 1  | 6    | 4    | 4    | 4   | 0  | 0   | 0    | 0   | 0  | 0   | 0   | 0   | 0   | 0   | 0   | 0 |
| 53931 | 111277 | 111278 | SSo622-like                                                    | 953   | 674  | 539   | 0    | 11   | 11  | 11  | 34 | 8    | 267  | 267  | 0   | 6  | 6   | 0    | 99  | 39 | 113 | 0   | 0   | 0   | 10  | 5   |   |
| 53931 | 111282 | 111283 | Putative modulator of DNA gyrase, PnbA/TLiD                    | 5585  | 2388 | 5207  | 2367 | 4    | 8   | 8   | 4  | 7    | 2995 | 2993 | 0   | 8  | 51  | 297  | 15  | 0  | 4   | 248 | 10  | 20  | 0   | 0   |   |
| 56572 | 111303 | 111304 | Recombination protein RecR                                     | 5000  | 1301 | 4994  | 1299 | 23   | 23  | 23  | 6  | 7    | 3715 | 3714 | 0   | 11 | 188 | 371  | 0   | 0  | 2   | 108 | 910 | 126 | 0   | 0   |   |
| 56572 | 111320 | 111321 | AFI104-like                                                    | 2720  | 871  | 1151  | 17   | 6    | 7   | 7   | 7  | 13   | 809  | 807  | 0   | 8  | 22  | 358  | 142 | 71 | 227 | 110 | 160 | 0   | 0   | 4   |   |
| 56572 | 111325 | 111326 | Uroacase                                                       | 5000  | 586  | 4911  | 579  | 10   | 16  | 16  | 2  | 7    | 2852 | 2852 | 0   | 10 | 16  | 276  | 82  | 1  | 4   | 158 | 704 | 321 | 0   | 1   |   |
| 56572 | 111330 | 111331 | NAD kinase/diacylglycerol kinase-like                          | 10088 | 340  | 10871 | 2423 | 18   | 60  | 60  | 11 | 13   | 6630 | 6621 | 0   | 24 | 261 | 327  | 52  | 4  | 203 | 110 | 168 | 0   | 0   | 0   |   |
| 56572 | 111336 | 111337 | QueA-like                                                      | 5000  | 232  | 2955  | 149  | 3    | 4   | 4   | 4  | 7    | 2051 | 2050 | 0   | 2  | 2   | 133  | 204 | 2  | 0   | 1   | 51  | 115 | 0   | 0   |   |
| 56572 | 111341 | 111342 | ChD-like                                                       | 3842  | 1269 | 1460  | 592  | 1    | 1   | 1   | 3  | 6    | 871  | 871  | 0   | 15 | 28  | 750  | 121 | 0  | 0   | 353 | 107 | 159 | 0   | 0   |   |
| 56572 | 111346 | 111347 | RapR/Ran-GAP                                                   | 5000  | 745  | 2941  | 743  | 7    | 7   | 7   | 34 | 20   | 286  | 286  | 0   | 0  | 0   | 0    | 0   | 0  | 0   | 267 | 0   | 0   | 0   | 0   |   |
| 56835 | 111351 | 111351 | Ammonium transporter                                           | 5000  | 588  | 4995  | 587  | 31   | 31  | 31  | 9  | 25   | 2885 | 2885 | 0   | 8  | 29  | 243  | 25  | 2  | 4   | 163 | 288 | 266 | 10  | 409 |   |
| 56835 | 111356 | 111357 | Mitochondrial ATP synthase coupling factor 6                   | 415   | 435  | 406   | 3    | 7    | 7   | 7   | 4  | 5    | 251  | 250  | 0   | 0  | 0   | 0    | 0   | 0  | 250 | 0   | 0   | 0   | 0   | 0   |   |
| 56835 | 54692  | 111364 | FtsK-like                                                      | 602   | 567  | 603   | 6    | 6    | 6   | 6   | 11 | 4    | 430  | 430  | 0   | 0  | 0   | 0    | 0   | 0  | 0   | 430 | 0   | 0   | 1   | 0   |   |
| 56835 | 111368 | 111369 | HyD-like secretion domain                                      | 5000  | 810  | 5000  | 800  | 39   | 43  | 43  | 13 | 7    | 1971 | 1969 | 0   | 3  | 11  | 196  | 1   | 0  | 0   | 194 | 0   | 0   | 0   | 0   |   |
| 56835 | 111378 | 111379 | VP4 membrane interaction domain                                | 3533  | 619  | 1615  | 96   | 9    | 14  | 14  | 1  | 5    | 237  | 0    | 23  | 0  | 0   | 0    | 0   | 0  | 0   | 0   | 0   | 0   | 0   | 0   |   |
| 56835 | 111383 | 111384 | OmpH-like                                                      | 2003  | 968  | 187   | 211  | 6    | 6   | 6   | 1  | 4    | 135  | 135  | 0   | 0  | 0   | 135  | 0   | 0  | 0   | 131 | 0   | 4   | 0   | 0   |   |
| 56992 | 57006  | 111388 | Pollen allergen ole e 6                                        | 12    | 34   | 12    | 22   | 1    | 1   | 1   | 1  | 4    | 18   | 18   | 0   | 0  | 0   | 0    | 0   | 0  | 0   | 18  | 0   | 0   | 0   | 0   |   |
| 56992 | 111417 | 111418 | Hormone receptor domain                                        | 5000  | 1437 | 1703  | 545  | 19   | 52  | 52  | 8  | 6    | 213  | 212  | 0   | 0  | 0   | 0    | 0   | 0  | 0   | 212 | 0   | 0   | 0   | 0   |   |
| 56992 | 111422 | 111423 | Yeast                                                          | 218   | 227  | 180   | 0    | 12   | 12  | 12  | 2  | 5    | 87   | 87   | 0   | 0  | 0   | 0    | 0   | 0  | 0   | 87  | 0   | 0   | 0   | 0   |   |
| 56992 | 111439 | 111440 | YAP1 repress domain                                            | 872   | 850  | 872   | 2    | 2    | 2   | 2   | 2  | 2    | 81   | 81   | 0   | 0  | 0   | 0    | 0   | 0  | 0   | 0   | 0   | 0   | 0   | 0   |   |
| 53931 | 116723 | 116726 | TRK A-cytosolic domain-like                                    | 9052  | 939  | 4089  | 646  | 4    | 72  | 72  | 25 | 26   | 2486 | 2486 | 0   | 9  | 89  | 325  | 230 | 0  | 1   | 623 | 273 | 743 | 0   | 1   |   |
| 53931 | 116733 | 116734 | DNA methylase specificity domain                               | 9657  | 852  | 8594  | 851  | 2    | 27  | 27  | 12 | 3574 | 3573 | 1    | 11  | 72 | 646 |      |     |    |     |     |     |     |     |     |   |







**Supplementary Table 5:** A comparison of the number of validated hits by our procedure compared to the other databases for the 12 superfamilies in the dataset has been provided. Corresponding Pfam families were identified from the Pfam HMM searches and the list of the families is provided below. Interpro families were identified from the links in Pfam site. Superfamily database has a list of SCOP superfamily homologues identified in complete genomes.

| <b>SCOP superfamily code</b> | <b>Superfamily description</b>              | <b>Total TP</b> | <b>Number of members in Superfamily</b> | <b>Number of members in Pfam</b> | <b>Number of members in InterPro</b> |
|------------------------------|---------------------------------------------|-----------------|-----------------------------------------|----------------------------------|--------------------------------------|
| 47336                        | ACP-like                                    | 22,882          | 21,857                                  | 47,239                           | 1,19,098                             |
| 47565                        | Insect Pheromone-OBPs                       | 2362            | 1373                                    | 1338                             | 7136                                 |
| 48345                        | A virus capsid protein alpha helical domain | 1693            | 3184                                    | 2                                | 3016                                 |
| 50203                        | Bacterial Enterotoxins                      | 2907            | 925                                     | 18                               | 625                                  |
| 51069                        | Carbonic anhydrase                          | 7427            | 3859                                    | 5155                             | 10,143                               |
| 51101                        | Mannose-binding lectins                     | 1932            | 1970                                    | 3063                             | 4616                                 |
| 51351                        | Triosephosphate isomerase                   | 7598            | 3939                                    | 6289                             | 23,265                               |
| 51679                        | Bacterial-luciferase like                   | 21,998          | 11046                                   | 20579                            | 78,487                               |
| 51971                        | Nucleotide-binding domain                   | 17,918          | 8765                                    |                                  | 68585                                |
| 55031                        | Bacterial exopeptidase dimerisation         | 28,405          | 15,894                                  | 31,615                           | 1,06,058                             |
| 55239                        | RuBisCo-small subunit                       | 1979            | 697                                     | 1064                             | 3478                                 |
| 55307                        | Tubulin-CTD-like                            | 15,953          | 9307                                    | 13,920                           | 60,676                               |

**Supplementary Table 6:** Percentage of the total Refseq proteome of 13 selected model organisms covered by the sequence search approach. We have identified 13-45% of the total sequences except for *Arabidopsis thaliana* (2.72%) and Mouse (72%).

| Taxid  | Organism                        | Common name            | Proteins identified in GenDiS+ | Total proteins (Refseq) | % of total proteins covered by GenDiS+ | Proteins in PDB | % of total proteins covered by PDB | Proteins in Superfamily | % of total proteins covered by Superfamily |
|--------|---------------------------------|------------------------|--------------------------------|-------------------------|----------------------------------------|-----------------|------------------------------------|-------------------------|--------------------------------------------|
| 9606   | <i>Homo sapiens</i>             | Human                  | 107273                         | 662155                  | 16.20                                  | 42971           | 6.48                               | 60672                   | 9.16                                       |
| 140831 | <i>Escherichia coli</i>         | Escherichia coli       | 269176                         | 2014886                 | 13.35                                  | 7997            | 0.39                               | 3003                    | 0.14                                       |
| 3702   | <i>Arabidopsis thaliana</i>     | Thale cress            | 14294                          | 525318                  | 2.72                                   | 1157            | 0.22                               | 16735                   | 3.18                                       |
| 4932   | <i>Saccharomyces cerevisiae</i> | Baker's yeast          | 27059                          | 130595                  | 20.71                                  | 3811            | 2.91                               | 3654                    | 2.79                                       |
| 3218   | <i>Physcomitrella patens</i>    | Spreading earthmoss    | 5085                           | 35982                   | 14.13                                  | 15              | 0.04                               | 18313                   | 50.89                                      |
| 7955   | <i>Danio rerio</i>              | Zebrafish              | 21368                          | 46860                   | 45.59                                  | 281             | 0.59                               | 31400                   | 67.00                                      |
| 8355   | <i>Xenopus laevis</i>           | African clawed frog    | 7760                           | 57279                   | 13.54                                  | 518             | 0.90                               | 15386                   | 26.86                                      |
| 10090  | <i>Mus musculus</i>             | Mouse                  | 55898                          | 77385                   | 72.23                                  | 6358            | 8.21                               | 16482                   | 21.29                                      |
| 6239   | <i>Caenorhabditis elegans</i>   | Caenorhabditis elegans | 5115                           | 36597                   | 13.97                                  | 368             | 1.00                               | 10383                   | 28.37                                      |
| 7227   | <i>Drosophila melanogaster</i>  | Fruitfly               | 11878                          | 61447                   | 19.33                                  | 910             | 1.48                               | 8404                    | 13.67                                      |
| 7070   | <i>Tribolium castaneum</i>      | Flour beetle           | 6612                           | 23392                   | 28.26                                  | 7               | 0.02                               | 8930                    | 38.17                                      |
| 4577   | <i>Zea mays</i>                 | Maize                  | 19301                          | 58492                   | 32.9                                   | 175             | 0.29                               | 31014                   | 53.02                                      |
| 9031   | <i>Gallus gallus</i>            | Chicken                | 13725                          | 47175                   | 29.09                                  | 1550            | 3.28                               | 11686                   | 24.77                                      |

**Supplementary Table 7:** The statistics for the fold prediction studies carried out for the 20 hits with the least sequence identity with the superfamily members. Hits from each member with varying percentage identity were used.

| <b>Superfamily</b> | <b>Superfamily description</b>              | <b>Number of members in PASS2.4</b> | <b>Number of hits for which fold prediction was done</b> | <b>Range of percentage identities for the hits selected (%)</b> |
|--------------------|---------------------------------------------|-------------------------------------|----------------------------------------------------------|-----------------------------------------------------------------|
| 47336              | ACP-like                                    | 8                                   | 160                                                      | 11.69-19.75                                                     |
| 47565              | Insect Pheromone-OBPs                       | 5                                   | 100                                                      | 7.69-10.62                                                      |
| 48345              | A virus capsid protein alpha helical domain | 3                                   | 60                                                       | 10.89-24.22                                                     |
| 50203              | Bacterial Enterotoxins                      | 17                                  | 340                                                      | 15.79-19                                                        |
| 51069              | Mannose-binding lectins                     | 4                                   | 80                                                       | 30.58-33.58                                                     |
| 51101              | Carbonic anhydrase                          | 4                                   | 80                                                       | 13.33-17.42                                                     |
| 51351              | Triosephosphate isomerase                   | 3                                   | 60                                                       | 15.69-17.06                                                     |
| 51679              | Bacterial-luciferase like                   | 6                                   | 120                                                      | 15.34-18.29                                                     |
| 51971              | Nucleotide-binding domain                   | 9                                   | 180                                                      | 17.41-32.69                                                     |
| 55031              | Bacterial exopeptidase dimerisation         | 8                                   | 160                                                      | 22.32-25.89                                                     |
| 55239              | RuBisCo-small subunit                       | 4                                   | 80                                                       | 24.79-27.50                                                     |
| 55307              | Tubulin-CTD-like                            | 6                                   | 120                                                      | 29.32-35.08                                                     |



**Supplementary Table 8:** The number of members identified for each SCOP class normalised with the number of superfamilies, families, SCOP domains and PDB entries for the class. Class  $\alpha/\beta$  shows a higher representation of hits even after normalisation. The numbers have been rounded-off to nearest integers.

| <b>SCOP description</b>                         | <b>Number of members normalised with number of superfamilies (SCOP v1.75)</b> | <b>Number of members normalised with number of families (SCOP v1.75)</b> | <b>Number of members normalised with number of superfamilies (SCOPE v2.06)</b> | <b>Number of members normalised with number of families(SCOPE v2.06)</b> |
|-------------------------------------------------|-------------------------------------------------------------------------------|--------------------------------------------------------------------------|--------------------------------------------------------------------------------|--------------------------------------------------------------------------|
| All alpha                                       | 5676                                                                          | 3304                                                                     | 5610                                                                           | 2743                                                                     |
| All beta                                        | 8106                                                                          | 3867                                                                     | 7861                                                                           | 3014                                                                     |
| Alpha and beta ( $\alpha/\beta$ )               | 25583                                                                         | 7774                                                                     | 25375                                                                          | 6344                                                                     |
| Alpha and beta ( $\alpha+\beta$ )               | 7905                                                                          | 4129                                                                     | 7751                                                                           | 3302                                                                     |
| Multi-domain proteins                           | 6679                                                                          | 4953                                                                     | 6389                                                                           | 3971                                                                     |
| Membrane and cell-surface proteins and peptides | 307                                                                           | 275                                                                      | 287                                                                            | 200                                                                      |
| Small proteins                                  | 4003                                                                          | 2358                                                                     | 3825                                                                           | 1934                                                                     |

| <b>SCOP description</b>                         | <b>Number of members normalised with number of PDB entries (SCOP v1.75)</b> | <b>Number of members normalised with number of domains (SCOP v1.75)</b> | <b>Number of members normalised with number of PDB entries (SCOPE v2.06)</b> | <b>Number of members normalised with number of domains (SCOPE v2.06)</b> |
|-------------------------------------------------|-----------------------------------------------------------------------------|-------------------------------------------------------------------------|------------------------------------------------------------------------------|--------------------------------------------------------------------------|
| All alpha                                       | 375                                                                         | 169                                                                     | 203                                                                          | 89                                                                       |
| All beta                                        | 268                                                                         | 108                                                                     | 136                                                                          | 54                                                                       |
| Alpha and beta ( $\alpha/\beta$ )               | 519                                                                         | 221                                                                     | 248                                                                          | 101                                                                      |
| Alpha and beta ( $\alpha+\beta$ )               | 392                                                                         | 171                                                                     | 193                                                                          | 81                                                                       |
| Multi-domain proteins                           | 367                                                                         | 201                                                                     | 167                                                                          | 83                                                                       |
| Membrane and cell-surface proteins and peptides | 55                                                                          | 18                                                                      | 25                                                                           | 8                                                                        |
| Small proteins                                  | 226                                                                         | 122                                                                     | 156                                                                          | 85                                                                       |

**Supplementary Table 9:** The increase in the range of organisms covered in SCOP1.75 to the sequences obtained in GenDiS for the test superfamilies. Many taxa not sampled by PDB have been identified in these superfamily.

| SCOP sf code | #organisms identified in this study | No. of organisms in SCOP (v2.06) | Organisms in PDB                                                                                                                                                                                                                                                                                                                                                                                                                                                                                                                                                                                                                                                                                                                                                                                                                                                                                                                                                                                                                                                                                                                                                                                                                                                                                                                                                                                                                                                                                          |
|--------------|-------------------------------------|----------------------------------|-----------------------------------------------------------------------------------------------------------------------------------------------------------------------------------------------------------------------------------------------------------------------------------------------------------------------------------------------------------------------------------------------------------------------------------------------------------------------------------------------------------------------------------------------------------------------------------------------------------------------------------------------------------------------------------------------------------------------------------------------------------------------------------------------------------------------------------------------------------------------------------------------------------------------------------------------------------------------------------------------------------------------------------------------------------------------------------------------------------------------------------------------------------------------------------------------------------------------------------------------------------------------------------------------------------------------------------------------------------------------------------------------------------------------------------------------------------------------------------------------------------|
| 47336        | 29026                               | 34                               | <i>Streptomyces coelicolor</i> , A3(2) [TaxId: 1902], <i>Bacillus subtilis</i> [TaxId: 1423], <i>Escherichia coli</i> [TaxId: 562], <i>Mycobacterium tuberculosis</i> [TaxId: 1773], <i>Shigella flexneri</i> [TaxId: 373384], <i>Thermotoga maritima</i> [TaxId: 2336], <i>Streptomyces roseofulvus</i> [TaxId: 33902], <i>Agrobacterium tumefaciens</i> [TaxId: 358], <i>Streptomyces rimosus</i> [TaxId: 1927], Norway rat ( <i>Rattus norvegicus</i> ) [TaxId: 10116], <i>A. tumefaciens</i> [TaxId: 176299], <i>Aquifex aeolicus</i> [TaxId: 224324], <i>B. subtilis</i> [TaxId: 224308], <i>E. coli</i> [TaxId: 885275], Human ( <i>Homo sapiens</i> ) [TaxId: 9606], <i>Thermus thermophilus</i> HB8 [TaxId: 300852], <i>Vibrio harveyi</i> [TaxId: 673519], <i>Bacillus brevis</i> [TaxId: 1393], <i>Lactobacillus casei</i> [TaxId: 1582], <i>Actinoplanes teichomyceticus</i> [TaxId: 1867], <i>Anaplasma phagocytophilum</i> [TaxId: 212042], <i>Brucella melitensis</i> [TaxId: 520466], <i>Enterococcus faecalis</i> [TaxId: 226185], <i>Leishmania major</i> [TaxId: 5664], Lyme disease spirochete ( <i>Borrelia burgdorferi</i> ) [TaxId: 139], <i>Plasmodium falciparum</i> [TaxId: 5833], <i>M. tuberculosis</i> [TaxId: 83332], <i>P. falciparum</i> [TaxId: 36329], <i>Rickettsia prowazekii</i> [TaxId: 272947], Spinach ( <i>Spinacia oleracea</i> ) [TaxId: 3562], <i>S. aureus</i> [TaxId: 93062], <i>S. coelicolor</i> [TaxId: 100226], <i>Streptomyces sp.</i> [TaxId: 1001349] |
| 47565        | 244                                 | 13                               | Polyphemus moth ( <i>Antheraea polyphemus</i> ) [TaxId: 7120], Fruit fly ( <i>Drosophila melanogaster</i> ) [TaxId: 7227], Madeira cockroach ( <i>Leucophaea maderae</i> ) [TaxId: 36963], Honeybee ( <i>Apis mellifera</i> ) [TaxId: 7460], Yellow mealworm ( <i>Tenebrio molitor</i> ) [TaxId: 7067], <i>Amyelois transitella</i> [TaxId: 680683], Silkworm ( <i>Bombyx mori</i> ) [TaxId: 7091], African malaria mosquito ( <i>Anopheles gambiae</i> ) [TaxId: 7165], <i>A. gambiae</i> [TaxId: 180454], <i>Culex quinquefasciatus</i> [TaxId: 7176], Yellow fever mosquito ( <i>Aedes aegypti</i> ) [TaxId: 7159], Fungus ( <i>Caldariomyces fumago</i> ) [TaxId: 5474]                                                                                                                                                                                                                                                                                                                                                                                                                                                                                                                                                                                                                                                                                                                                                                                                                               |
| 48345        | 304                                 | 4                                | Bluetongue virus [TaxId: 40051], Bovine rotavirus strain uk/g6 [TaxId: 10934], Bovine rotavirus [TaxId: 10927], Rice dwarf virus [TaxId: 10991]                                                                                                                                                                                                                                                                                                                                                                                                                                                                                                                                                                                                                                                                                                                                                                                                                                                                                                                                                                                                                                                                                                                                                                                                                                                                                                                                                           |
| 50203        | 5132                                | 16                               | <i>Vibrio cholerae</i> [TaxId: 666], <i>E. coli</i> , type IB [TaxId: 562], <i>Bordetella pertussis</i> [TaxId: 520], Enterobacteria phage [TaxId: 10730], <i>Shigella dysenteriae</i> , toxin I [TaxId: 622], <i>Citrobacter freundii</i> [TaxId: 546], <i>E. coli</i> O157:H7 [TaxId: 83334], <i>V. cholerae</i> [TaxId: 37965], <i>S. aureus</i> [TaxId: 1280], <i>Streptococcus pyogenes</i> [TaxId: 1314], <i>S. aureus</i> [TaxId: 158879], <i>S. aureus</i> [TaxId: 426430], <i>S. aureus</i> [TaxId: 93061], <i>S. aureus</i> [TaxId: 93062]                                                                                                                                                                                                                                                                                                                                                                                                                                                                                                                                                                                                                                                                                                                                                                                                                                                                                                                                                      |
| 51101        | 472                                 | 24                               | Jackfruit ( <i>Artocarpus heterophyllus</i> ) [TaxId: 3489], Hedge bindweed ( <i>Calystegia sepium</i> ) [TaxId: 47519], <i>Griffithsia sp. Q66D336</i> [TaxId: 373036], Red alga ( <i>Griffithsia</i> ) [TaxId: 35158], Jerusalem artichoke ( <i>Helianthus tuberosus</i> ) [TaxId: 4233], <i>Artocarpus hirsuta</i> [TaxId: 291940], Osage orange ( <i>Maclura pomifera</i> ) [TaxId: 3496], <i>Artocarpus integer</i> [TaxId: 3490], <i>Griffithsia sp.</i> [TaxId: 373036], <i>Musa acuminata</i> [TaxId: 4641], Sweet potato ( <i>Ipomoea batatas</i> ) [TaxId: 4120], Bluebell ( <i>Scilla campanulata</i> ) [TaxId: 81759], <i>Gastrodia elata</i> [TaxId: 91201], Daffodil ( <i>Narcissus pseudonarcissus</i> ) [TaxId: 39639], Garlic ( <i>Allium sativum</i> ) [TaxId: 4682], Snowdrop ( <i>Galanthus nivalis</i> ) [TaxId: 4670], <i>Colocasia esculenta</i> [TaxId: 4460],                                                                                                                                                                                                                                                                                                                                                                                                                                                                                                                                                                                                                    |

|       |       |    |                                                                                                                                                                                                                                                                                                                                                                                                                                                                                                                                                                                                                                                                                                                                                                                                                                                                                                                                                                                                                                                                                                                                                                                                                                                                                                                                                                                                                                                                                                                                                                                                                                       |
|-------|-------|----|---------------------------------------------------------------------------------------------------------------------------------------------------------------------------------------------------------------------------------------------------------------------------------------------------------------------------------------------------------------------------------------------------------------------------------------------------------------------------------------------------------------------------------------------------------------------------------------------------------------------------------------------------------------------------------------------------------------------------------------------------------------------------------------------------------------------------------------------------------------------------------------------------------------------------------------------------------------------------------------------------------------------------------------------------------------------------------------------------------------------------------------------------------------------------------------------------------------------------------------------------------------------------------------------------------------------------------------------------------------------------------------------------------------------------------------------------------------------------------------------------------------------------------------------------------------------------------------------------------------------------------------|
|       |       |    | <i>Crocus vernus</i> [TaxId: 87752], <i>Curculigo latifolia</i> [TaxId: 4676], Fairy-ring mushroom ( <i>Marasmius oreades</i> ) [TaxId: 181124], <i>Mycobacterium smegmatis</i> [TaxId: 246196], <i>Polygonatum cyrtonema</i> [TaxId: 195526], <i>Remusatia vivipara</i> [TaxId: 189456]                                                                                                                                                                                                                                                                                                                                                                                                                                                                                                                                                                                                                                                                                                                                                                                                                                                                                                                                                                                                                                                                                                                                                                                                                                                                                                                                              |
| 51069 | 2555  | 15 | Cow ( <i>Bos taurus</i> ) [TaxId: 9913], Human ( <i>H. sapiens</i> ) [TaxId: 9606], Mouse ( <i>Mus musculus</i> ) [TaxId: 10090], <i>Neisseria gonorrhoeae</i> [TaxId: 485], Norway rat ( <i>R. norvegicus</i> ) [TaxId: 10116], <i>Dioscorea japonica</i> [TaxId: 4673], <i>Dunaliella salina</i> [TaxId: 3046], Fungus ( <i>Aspergillus oryzae</i> ) [TaxId: 5062], Green alga ( <i>Chlamydomonas reinhardtii</i> ) [TaxId: 3055], <i>Helicobacter pylori</i> [TaxId: 563041], <i>Helicobacter pylori</i> [TaxId: 85962], <i>Thermovibrio ammonificans</i> [TaxId: 228745], <i>Thiomicrospira crunogena</i> [TaxId: 317025], <i>T. ammonificans</i> [TaxId: 648996], <i>Vaccinia virus</i> [TaxId: 10245]                                                                                                                                                                                                                                                                                                                                                                                                                                                                                                                                                                                                                                                                                                                                                                                                                                                                                                                           |
| 55031 | 22247 | 11 | <i>E. coli</i> [TaxId: 562], <i>Lactobacillus delbrueckii</i> [TaxId: 1584], <i>Pseudomonas sp., strain rs-16</i> [TaxId: 306], Thale cress ( <i>Arabidopsis thaliana</i> ) [TaxId: 3702], <i>Salmonella typhimurium</i> [TaxId: 90371], Yeast ( <i>Saccharomyces kluyveri</i> ) [TaxId: 4934], <i>B. subtilis</i> [TaxId: 1423], <i>Neisseria meningitidis</i> [TaxId: 487], Human ( <i>H. sapiens</i> ) [TaxId: 9606], <i>Pseudomonas mevalonii</i> [TaxId: 32044]                                                                                                                                                                                                                                                                                                                                                                                                                                                                                                                                                                                                                                                                                                                                                                                                                                                                                                                                                                                                                                                                                                                                                                  |
| 55239 | 1337  | 14 | <i>Alcaligenes eutrophus</i> [TaxId: 106590], <i>Galdieria partita</i> [TaxId: 83374], Green alga ( <i>Chlamydomonas reinhardtii</i> ) [TaxId: 3055], <i>Halothiobacillus neapolitanus</i> [TaxId: 927], Rice ( <i>Oryza sativa</i> ) [TaxId: 4530], Spinach ( <i>S. oleracea</i> ) [TaxId: 3562], <i>Synechococcus sp., strain pcc 6301</i> [TaxId: 1131], Tobacco ( <i>Nicotiana tabacum</i> ), variant turkish samsun [TaxId: 4097], <i>Oryza sativa</i> [TaxId: 39947], Pea ( <i>Pisum sativum</i> ) [TaxId: 3888], Red algae ( <i>Galdieria sulphuraria</i> ) [TaxId: 130081], <i>Thermosynechococcus elongatus</i> [TaxId: 197221]                                                                                                                                                                                                                                                                                                                                                                                                                                                                                                                                                                                                                                                                                                                                                                                                                                                                                                                                                                                              |
| 55307 | 21380 | 19 | <i>A. aeolicus</i> [TaxId: 224324], <i>A. aeolicus</i> [TaxId: 63363], <i>B. subtilis</i> [TaxId: 1423], <i>Methanococcus jannaschii</i> [TaxId: 2190], <i>M. tuberculosis</i> [TaxId: 1773], <i>Pseudomonas aeruginosa</i> [TaxId: 287], <i>S. aureus</i> [TaxId: 1280], <i>S. aureus</i> [TaxId: 158878], <i>T. maritima</i> [TaxId: 2336], Cow ( <i>Bos taurus</i> ) [TaxId: 9913], Pig ( <i>Sus scrofa</i> ) [TaxId: 9823], <i>Prostheco bacter dejongeii</i> [TaxId: 48465], Chicken ( <i>Gallus gallus</i> ) [TaxId: 9031], Sheep ( <i>Ovis aries</i> ) [TaxId: 9940], <i>Sus barbatus</i> [TaxId: 41807], <i>B. subtilis</i> [TaxId: 1423], Baker's yeast ( <i>Saccharomyces cerevisiae</i> ) [TaxId: 4932], Baker's yeast ( <i>S. cerevisiae</i> ) [TaxId: 559292], <i>Staphylococcus epidermidis</i> [TaxId: 176279]                                                                                                                                                                                                                                                                                                                                                                                                                                                                                                                                                                                                                                                                                                                                                                                                         |
| 51351 | 19143 | 38 | <i>Bacillus stearothermophilus</i> [TaxId: 1422], Baker's yeast ( <i>S. cerevisiae</i> ) [TaxId: 4932], Chicken ( <i>Gallus gallus</i> ) [TaxId: 9031], Entamoeba ( <i>Entamoeba histolytica</i> ) [TaxId: 5759], <i>E. coli</i> [TaxId: 562], Human ( <i>H. sapiens</i> ) [TaxId: 9606], Malaria parasite ( <i>P. falciparum</i> ) [TaxId: 5833], <i>Methanocaldococcus jannaschii</i> [TaxId: 243232], Nematode ( <i>Caenorhabditis elegans</i> ) [TaxId: 6239], <i>Pyrococcus woesei</i> [TaxId: 2262], Rabbit ( <i>Oryctolagus cuniculus</i> ) [TaxId: 9986], <i>S. aureus</i> [TaxId: 282458], <i>Thermoproteus tenax</i> [TaxId: 2271], <i>T. maritima</i> [TaxId: 2336], Trypanosoma cruzi [TaxId: 5693], Trypanosome ( <i>Leishmania mexicana</i> ) [TaxId: 5665], Trypanosome ( <i>Trypanosoma brucei</i> ) [TaxId: 5691], <i>Vibrio marinus</i> [TaxId: 90736], Yellow mealworm ( <i>Tenebrio molitor</i> ) [TaxId: 7067], <i>Gemmata obscuriglobus</i> [TaxId: 114], <i>Rhipicephalus microplus</i> [TaxId: 6941], <i>Trypanosoma brucei</i> [TaxId: 5702], <i>Bartonella henselae</i> [TaxId: 38323], <i>B. melitensis</i> [TaxId: 546272], <i>Burkholderia thailandensis</i> [TaxId: 271848], <i>Clostridium perfringens</i> [TaxId: 195102], <i>Cryptosporidium parvum</i> [TaxId: 353152], <i>Deinococcus radiodurans</i> [TaxId: 243230], <i>E. coli</i> [TaxId: 316385], <i>Giardia intestinalis</i> [TaxId: 5741], Green alga ( <i>Chlamydomonas reinhardtii</i> ) [TaxId: 3055], <i>Helicobacter pylori</i> [TaxId: 85962], <i>Leishmania sp.</i> [TaxId: 438838], <i>M. tuberculosis</i> [TaxId: 1773], <i>M.</i> |

|       |       |    |                                                                                                                                                                                                                                                                                                                                                                                                                                                                                                                                                                                                   |
|-------|-------|----|---------------------------------------------------------------------------------------------------------------------------------------------------------------------------------------------------------------------------------------------------------------------------------------------------------------------------------------------------------------------------------------------------------------------------------------------------------------------------------------------------------------------------------------------------------------------------------------------------|
|       |       |    | <i>tuberculosis</i> [TaxId: 83332], <i>S. coelicolor</i> [TaxId: 100226], Thale cress ( <i>A. thaliana</i> ) [TaxId: 3702], <i>Trichomonas vaginalis</i> [TaxId: 5722]                                                                                                                                                                                                                                                                                                                                                                                                                            |
| 51679 | 16109 | 13 | <i>V. harveyi</i> [TaxId: 669], <i>Photobacterium leiognathi</i> [TaxId: 553611], <i>Photobacterium phosphoreum</i> [TaxId: 659], <i>Methanoculleus thermophilicus</i> [TaxId: 2200], <i>Methanobacterium thermoautotrophicum</i> [TaxId: 145262], <i>Methanopyrus kandleri</i> [TaxId: 2320], <i>E. coli</i> [TaxId: 562], <i>B. subtilis</i> [TaxId: 1423], <i>Bacillus cereus</i> [TaxId: 222523], <i>Burkholderia pseudomallei</i> [TaxId: 320372], <i>Geobacillus thermodenitrificans</i> [TaxId: 33940], <i>Methanosarcina barkeri</i> [TaxId: 2208], <i>M. tuberculosis</i> [TaxId: 83332] |
| 51971 | 20745 | 8  | <i>E. coli</i> [TaxId: 562], Cow ( <i>Bos taurus</i> ) [TaxId: 9913], Pig ( <i>Sus scrofa</i> ) [TaxId: 9823], <i>M. tuberculosis</i> [TaxId: 1773], <i>Methylophilus methylotrophus</i> , w3a1 [TaxId: 17], <i>Rhodotorula gracilis</i> [TaxId: 5286], <i>Klebsiella pneumoniae</i> [TaxId: 573]                                                                                                                                                                                                                                                                                                 |

**Supplementary Table 10:** The superfamilies which show instances of lateral gene transfer from viruses to cellular organisms. In most cases, the cellular host of the virus showed presence of the superfamilies which had been reported only in Viruses. Most of these are retroviral transfer events.

| Class | Fold  | Super-family | Description                                                       | GIs   | Taxids | Cellular host                                                                                                                                                                                                | Viruses                                                                                                                                                                                               |
|-------|-------|--------------|-------------------------------------------------------------------|-------|--------|--------------------------------------------------------------------------------------------------------------------------------------------------------------------------------------------------------------|-------------------------------------------------------------------------------------------------------------------------------------------------------------------------------------------------------|
| 46456 | 47076 | 47077        | T4 endonuclease V                                                 | 207   | 138    | <i>Proteobacteria</i>                                                                                                                                                                                        | Caudovirales, Phycodnaviridae                                                                                                                                                                         |
| 46456 | 47835 | 47836        | Retroviral matrix proteins                                        | 8265  | 295    | <i>Amniota, Chlamydia trachomatis, Trypanosoma congolense</i>                                                                                                                                                | Retroviridae, Poxviridae                                                                                                                                                                              |
| 46456 | 47942 | 47943        | Retrovirus capsid protein, N-terminal core domain                 | 22440 | 305    | <i>Amniota, Trypanosoma congolense</i>                                                                                                                                                                       | Retroviridae, Poxviridae                                                                                                                                                                              |
| 46456 | 48492 | 48493        | gene 59 helicase assembly protein                                 | 129   | 102    | <i>Proteobacteria, Actinobacteria</i>                                                                                                                                                                        | Caudovirales                                                                                                                                                                                          |
| 48724 | 88632 | 49749        | Group II dsDNA viruses VP                                         | 1209  | 350    | <i>Ectocarpus siliculosus, Verrucomicrobia, Acanthamoeba castellanii str. Neff, Hydra vulgaris</i>                                                                                                           | Adenoviridae, Iridoviridae, Phycodnaviridae, Mimiviridae, Tectiviridae                                                                                                                                |
| 48724 | 49829 | 49830        | ENV polyprotein, receptor-binding domain                          | 104   | 30     | <i>Amniota</i>                                                                                                                                                                                               | Retroviridae                                                                                                                                                                                          |
| 48724 | 49834 | 49835        | Virus attachment protein globular domain                          | 602   | 217    | <i>Lactococcus lactis, E. Coli, Chlamydia trachomatis, Rhodococcus sp., Porphyromonas macacae, Ensifer sp.</i>                                                                                               | Caudovirales, Adenoviridae, Reoviridae                                                                                                                                                                |
| 48724 | 50016 | 50017        | gp9                                                               | 63    | 63     | <i>Streptomyces ahygroscopicus</i>                                                                                                                                                                           | Caudovirales                                                                                                                                                                                          |
| 48724 | 50036 | 50122        | DNA-binding domain of retroviral integrase                        | 5701  | 103    | <i>Amniota, Brugia malayi, Nuttalliella namaqua</i>                                                                                                                                                          | Retroviridae                                                                                                                                                                                          |
| 48724 | 50938 | 50939        | Sialidases                                                        | 16625 | 11206  | <i>Bacteria, Metazoa, Fungi, Euglenozoa, Choanoflagellida, Trichomonas vaginalis, Karenia brevis</i>                                                                                                         | Orthomyxoviridae, Mononegavirales, Phycodnaviridae, Caudovirales, Adenoviridae                                                                                                                        |
| 48724 | 51224 | 51225        | Fibre shaft of virus attachment proteins                          | 122   | 40     | <i>Xenorhabdus cabanillasii</i>                                                                                                                                                                              | Adenoviridae, Reoviridae, Caudovirales                                                                                                                                                                |
| 48724 | 51331 | 51332        | E2 regulatory, transactivation domain                             | 723   | 337    | <i>Chlamydia trachomatis</i>                                                                                                                                                                                 | Papillomaviridae                                                                                                                                                                                      |
| 53931 | 54861 | 54957        | Viral DNA-binding domain                                          | 802   | 346    | <i>Chlamydia trachomatis</i>                                                                                                                                                                                 | Papillomaviridae, Herpesvirales                                                                                                                                                                       |
| 53931 | 54861 | 55056        | Killer toxin KP6 alpha-subunit                                    | 6     | 3      | <i>Ustilago maydis</i>                                                                                                                                                                                       | Ustilago maydis virus P6, Ustilago maydis dsRNA virus                                                                                                                                                 |
| 53931 | 54861 | 55064        | Translational regulator protein regA                              | 124   | 108    | <i>Streptomyces ahygroscopicus, Proteobacteria bacterium JGI 0000113-L05, Proteobacteria bacterium JGI 0000113-L07</i>                                                                                       | Caudovirales                                                                                                                                                                                          |
| 53931 | 55670 | 55671        | Regulatory factor Nef                                             | 6177  | 24     | <i>Mus musculus</i>                                                                                                                                                                                          | Retroviridae                                                                                                                                                                                          |
| 53931 | 56501 | 56502        | gp120 core                                                        | 4994  | 17     | <i>Homo sapiens</i>                                                                                                                                                                                          | Retroviridae                                                                                                                                                                                          |
| 53931 | 56547 | 56548        | Conserved core of transcriptional regulatory protein vp16         | 88    | 41     | <i>Gallus gallus</i>                                                                                                                                                                                         | Herpesvirales                                                                                                                                                                                         |
| 53931 | 56557 | 56558        | Baseplate structural protein gp11                                 | 60    | 60     | <i>Streptomyces ahygroscopicus</i>                                                                                                                                                                           | Caudovirales                                                                                                                                                                                          |
| 56572 | 56825 | 56826        | Upper collar protein gp10 (connector protein)                     | 27    | 20     | <i>Enterococcus faecium, Enterococcus faecalis, Chlamydia trachomatis, Trichuris trichiura, Eggerthella sp. CAG:1427, Bacteroides sp. CAG:1076</i>                                                           | Caudovirales                                                                                                                                                                                          |
| 56992 | 57755 | 57756        | Retrovirus zinc finger-like domains                               | 6605  | 154    | <i>Metazoa, Brugia malayi, Echinococcus multilocularis</i>                                                                                                                                                   | Retroviridae                                                                                                                                                                                          |
| 48724 | 69348 | 69349        | Phage fibre proteins                                              | 379   | 139    | <i>Proteobacteria, Firmicutes, Streptomyces ahygroscopicus</i>                                                                                                                                               | Caudovirales                                                                                                                                                                                          |
| 56835 | 69921 | 69922        | Head and neck region of the ectodomain of NDV fusion glycoprotein | 2161  | 130    | <i>Clostridium tetani</i>                                                                                                                                                                                    | Mononegavirales                                                                                                                                                                                       |
| 56572 | 82855 | 82856        | L-A virus major coat protein                                      | 13    | 7      | <i>Saccharomyces</i>                                                                                                                                                                                         | Totivirus                                                                                                                                                                                             |
| 48724 | 88632 | 88633        | Positive stranded ssRNA viruses                                   | 15700 | 2255   | <i>Propionibacterium acnes J165</i>                                                                                                                                                                          | Caliciviridae, Picornavirales, Bromoviridae, Tombusviridae, Tymovirales, Birnaviridae, Nodaviridae, Sobemovirus, Alphatetraviridae, Primate T-lymphotropic virus 1, Polemovirus, Alphacarmotetravirus |
| 48724 | 88632 | 88645        | ssDNA viruses                                                     | 2578  | 319    | <i>Saitoella complicata NRRL Y-17804, Zygosaccharomyces bailii ISA1307, Xanthophyllomyces dendrorhous, Proteobacteria, Firmicutes, Actinobacteria, Capnocytophaga sp., Bacteroidetes, Chlamydia psittaci</i> | Parvoviridae, Microviridae                                                                                                                                                                            |
| 48724 | 88632 | 88648        | Group I dsDNA viruses                                             | 1451  | 460    | <i>Chlamydia trachomatis, Homo sapiens</i>                                                                                                                                                                   | Papillomaviridae, Polyomaviridae                                                                                                                                                                      |
| 48724 | 88632 | 88650        | Satellite viruses                                                 | 76    | 13     | <i>Wuchereria bancrofti</i>                                                                                                                                                                                  | Satellite Viruses, Necrovirus                                                                                                                                                                         |
| 53931 | 88873 | 88874        | Receptor-binding domain of short tail fibre protein gp12          | 88    | 69     | <i>Proteobacteria, firmicutes, Bacteroidetes, Streptomyces ahygroscopicus</i>                                                                                                                                | Caudovirales                                                                                                                                                                                          |
| 48724 | 89432 | 89433        | Baseplate structural protein gp8                                  | 66    | 63     | <i>Streptomyces ahygroscopicus</i>                                                                                                                                                                           | Caudovirales                                                                                                                                                                                          |

|       |        |        |                                          |      |     |                                                                                                         |                                 |
|-------|--------|--------|------------------------------------------|------|-----|---------------------------------------------------------------------------------------------------------|---------------------------------|
| 53931 | 103067 | 103068 | Nucleocapsid protein dimerization domain | 2255 | 232 | <i>Escherichia coli</i> 1-176-05_S1_C1, <i>Escherichia coli</i> 1-110-08_S3_C2                          | Nidovirales                     |
| 46456 | 47379  | 109801 | Hypothetical protein D-63                | 7    | 6   | <i>Sulfolobus islandicus</i>                                                                            | Sulfolobus spindle-shaped virus |
| 48724 | 110303 | 110304 | Coronavirus RNA-binding domain           | 813  | 174 | <i>Escherichia coli</i> 1-176-05_S1_C1, <i>Escherichia coli</i> 1-110-08_S3_C2                          | Nidovirales                     |
| 46456 | 140808 | 140809 | Rhabdovirus nucleoprotein-like           | 1747 | 164 | <i>Aedes aegypti</i> , <i>Brugia malayi</i>                                                             | Mononegavirales                 |
| 48724 | 141657 | 141658 | Bacteriophage trimeric proteins domain   | 106  | 92  | <i>Proteobacteria</i> , <i>Firmicutes</i> , <i>Porphyromonas macacae</i> , <i>Chlamydia trachomatis</i> | Caudovirales                    |
| 53931 | 143075 | 143076 | Coronavirus NSP8-like                    | 1197 | 231 | <i>Escherichia coli</i>                                                                                 | Nidovirales                     |
| 53931 | 143586 | 143587 | SARS receptor-binding domain-like        | 171  | 112 | <i>Escherichia coli</i> 1-110-08_S3_C3, <i>Homo sapiens</i>                                             | Nidovirales                     |
| 53931 | 54235  | 159936 | NSP3A-like                               | 567  | 143 | <i>E. coli</i>                                                                                          | Nidovirales                     |
| 56992 | 161228 | 161229 | E6 C-terminal domain-like                | 876  | 215 | <i>Chlamydia trachomatis</i>                                                                            | Papillomaviridae                |
| 56992 | 161233 | 161234 | E7 C-terminal domain-like                | 574  | 233 | <i>Chlamydia trachomatis</i> , <i>Homo sapiens</i>                                                      | Papillomaviridae                |
| 56992 | 161239 | 161240 | T-antigen specific domain-like           | 276  | 83  | <i>Mus musculus</i>                                                                                     | Polyomaviridae                  |

**Supplementary Table 11:** Trends in some superfamilies with a narrow taxonomic distribution. The taxonomic and DA details of the superfamilies with only multi-domain architectures. Either these domains do not occur singly or the single domain forms might emerge after taxonomic sampling of a wider range of genomes.

| Super-family | Super-family description                                     | Number of True positive hits | Number of Taxid | SCOP domain architectures                                                                                                                                                                                                                           | Phyletic distribution                                                                                            |
|--------------|--------------------------------------------------------------|------------------------------|-----------------|-----------------------------------------------------------------------------------------------------------------------------------------------------------------------------------------------------------------------------------------------------|------------------------------------------------------------------------------------------------------------------|
| 103623       | Rubredoxin-like                                              | 7                            | 5               | 56712~103623, 54631~103623                                                                                                                                                                                                                          | Euryarchaeota                                                                                                    |
| 64043        | Cell-division inhibitor MinC, N-terminal domain              | 24                           | 20              | 64043~63848                                                                                                                                                                                                                                         | Thermotogae                                                                                                      |
| 68930        | Protein-L-isoaspartyl O-methyltransferase, C-terminal domain | 6                            | 1               | 53335~68930                                                                                                                                                                                                                                         | Thermotogae                                                                                                      |
| 69008        | RecG, N-terminal domain                                      | 26                           | 24              | 169008~50249~52540~52540                                                                                                                                                                                                                            | Thermotogae                                                                                                      |
| 69075        | Glutamyl tRNA-reductase dimerization domain                  | 49                           | 37              | 69742~51984~69075, 69742~69075, 69742~51735~69075                                                                                                                                                                                                   | Euryarchaeota, Proteobacteria                                                                                    |
| 69322        | Tricorn protease domain 2                                    | 364                          | 253             | 69304~69322~52096, 69304~69304~69322~52096, 69322~52096~50156~52096, 69304~69322~50156~52096, 69304~69322~52096~52096, 69322~52096, 69304~69304~69322~52096~52096, 69304~69304~69322, 69304~69322~52096~50156~52096, 69304~69322, 69322~52096~52096 | Actinobacteria, Thermoprotei, Chlorobi, Thermotogae, Thermoplasmata, Armatimonadetes, Proteobacteria, Firmicutes |
| 81665        | Metal cation-transporting ATPase, transmembrane domain       | 5                            | 1               | 81653~81665~81660~81665, 81653~81665~81660~56784~81665, 81665~81660~81665, 81653~81660~81665                                                                                                                                                        | Fusobacteria, Fungi, Metazoa, Apicomplexa                                                                        |
| 81878        | BRCA2 tower domain                                           | 30                           | 6               | 81872~50249~81878, 50249~81878, 50249~81878~50249~50249, 50249~81878~50249~50249, 81872~50249~81878~50249, 81878~50249~50249, 81872~50249~81878~50249~50249, 50249~81878~50249                                                                      | Superfamily: Muroidea                                                                                            |
| 82220        | Tp47 lipoprotein, N-terminal domain                          | 8                            | 2               | 82220~81986~81986                                                                                                                                                                                                                                   | Genus: Treponema<br>Family: Spirochaetes                                                                         |

**Supplementary Table 12:** The most frequently occurring SCOP and Pfam DA have been listed for all the superfamilies. The Pfam family and SCOP superfamily codes have been used for the Pfam DA and SCOP DA respectively. In both the cases, we see that the single domain forms are more common, even though other multi-domain forms may exist in the superfamily. The superfamilies in red do not have any matches in Pfam.

| SCOP  | SUPERFAMILY DESCRIPTION                                                                | MOST COMMON SCOP DA                 | MOST COMMON Pfam DA                                               |
|-------|----------------------------------------------------------------------------------------|-------------------------------------|-------------------------------------------------------------------|
| 46458 | Globin-like                                                                            | 46458                               | Globin                                                            |
| 46548 | alpha-helical ferredoxin                                                               | 54292~46548                         | Fer2_3~Fer4_17                                                    |
| 46557 | GreA transcript cleavage protein, N-terminal domain                                    | 46557~54534                         | GreA_GreB_N~GreA_GreB                                             |
| 46561 | Ribosomal protein L29 (L29p)                                                           | 46561                               | Ribosomal_L29                                                     |
| 46565 | Chaperone J-domain                                                                     | 46565~57938~49493                   | DnaJ~DnaJ_C                                                       |
| 46575 | DNA polymerase III theta subunit-like                                                  | 46575                               | DNA_pol3_theta                                                    |
| 46579 | Prefoldin                                                                              | 46579                               | Prefoldin                                                         |
| 46585 | HR1 repeat                                                                             | 46585~46585~46585~56112             | HR1~HR1~HR1~Pkinase~Pkinase_C                                     |
| 46589 | tRNA-binding arm                                                                       | 46589~55681                         | Phe_tRNA-synt_N~tRNA-synt_2d                                      |
| 46596 | Eukaryotic DNA topoisomerase I, dispensable insert domain                              | 46596                               | Topo_C_assoc                                                      |
| 46600 | C-terminal UvrC-binding domain of UvrB                                                 | 52540~52540~52540~46600             | Helicase_C~UvrB~UVR                                               |
| 46604 | Epsilon subunit of F1F0-ATP synthase C-terminal domain                                 | 51344~46604                         | ATP-synt_DE_N~ATP-synt_DE                                         |
| 46609 | Fe,Mn superoxide dismutase (SOD), N-terminal domain                                    | 46609~54719                         | Sod_Fe_N~Sod_Fe_C                                                 |
| 46626 | Cytochrome c                                                                           | 46626                               | Cytochrom_C                                                       |
| 46689 | Homeodomain-like                                                                       | 46689                               | TetR_N                                                            |
| 46767 | Methylated DNA-protein cysteine methyltransferase, C-terminal domain                   | 46767                               | Methyltransf_1N~DNA_binding_1                                     |
| 46774 | ARID-like                                                                              | 46774                               | ARID                                                              |
| 46785 | Winged helix DNA-binding domain                                                        | 46785                               | MarR                                                              |
| 46894 | C-terminal effector domain of the bipartite response regulators                        | 52172~46894                         | Response_reg~GerE                                                 |
| 46906 | Ribosomal protein L11, C-terminal domain                                               | 54747~46906                         | Ribosomal_L11_N~Ribosomal_L11                                     |
| 46911 | Ribosomal protein S18                                                                  | 46911                               | Ribosomal_S18                                                     |
| 46915 | Polynucleotide phosphorylase/guanosine pentaphosphate synthase (PNPase/GPSI), domain 3 | 54211~55666~46915~54211~55666~50249 | RNase_PH~RNase_PH_C~PNPase~RNase_PH~RNase_PH_C~KH_1~S1            |
| 46919 | N-terminal Zn binding domain of HIV integrase                                          | 50630~56672~53098~46919~53098~50122 | RVP~RVT_1~RVT_thumb~RVT_connect~RNase_H~Integrase_Zn~rve~IN_DBD_C |
| 46924 | RNA polymerase subunit RPB10                                                           | 46924                               | RNA_pol_N                                                         |
| 46929 | DNA helicase RuvA subunit, C-terminal domain                                           | 50249~47781~46929                   | RuvA_N~HHH_5~RuvA_C                                               |
| 46934 | UBA-like                                                                               | 46934~54713~54713                   | EF_TS                                                             |
| 46938 | CRAL/TRIO N-terminal domain                                                            | 46938~52087                         | CRAL_TRIO                                                         |



|       |                                                                           |                                           |                                                                |
|-------|---------------------------------------------------------------------------|-------------------------------------------|----------------------------------------------------------------|
| 46942 | Elongation factor TFIIS domain 2                                          | 47676~46942~57783                         | Med26~TFIIS_M~TFIIS_C                                          |
| 46946 | S13-like H2TH domain                                                      | 81624~46946~57716                         | Fapy_DNA_glyco~H2TH~zf-FPG_IleRS                               |
| 46950 | Double-stranded DNA-binding domain                                        | 46950                                     | dsDNA_bind                                                     |
| 46955 | Putative DNA-binding domain                                               | 46955                                     | tRNA_bind~B3_4~B5~FDX-ACB                                      |
| 46966 | Spectrin repeat                                                           | 47576~47576~46966~46966~46966~46966~47473 | CH~CH~Spectrin~Spectrin~Spectrin~Spectrin~EFhand_Ca_insen      |
| 46973 | Enzyme IIa from lactose specific PTS, IIa-lac                             | 46973                                     | PTS_IIA                                                        |
| 46977 | Succinate dehydrogenase/fumarate reductase flavoprotein C-terminal domain | 51905~56425~46977                         | FAD_binding_2~Succ_DH_flav_C                                   |
| 46984 | Smac/diablo                                                               | 46984                                     | Smac_DIABLO                                                    |
| 46988 | Tubulin chaperone cofactor A                                              | 46988                                     | TBCA                                                           |
| 46992 | Ribosomal protein S20                                                     | 46992                                     | Ribosomal_S20p                                                 |
| 46997 | Bacterial immunoglobulin/albumin-binding domains                          | 46997~46997~46997~46997~46997             | YSIRK_signal~B~B~B~B~B~LysM~Gram_pos_anchor                    |
| 47005 | Peripheral subunit-binding domain of 2-oxo acid dehydrogenase complex     | 51230~47005~52777                         | Biotin_lipoyl~E3_binding~2-oxoacid_dh                          |
| 47014 | Protozoan pheromone proteins                                              | 47014                                     | E_raikovi_mat                                                  |
| 47027 | Acyl-CoA binding protein                                                  | 47027                                     | ACBP                                                           |
| 47031 | Second domain of FERM                                                     | 54236~47031~50729                         | FERM_N~FERM_M~FERM_C~FA~SAB~4_1_CTD                            |
| 47040 | Kix domain of CBP (creb binding protein)                                  | 57933~47040~47370~57850~57933~69125       | zf-TAZ~KIX~Bromodomain~DUF902~HAT_KAT11~ZZ~zf-TAZ~Creb_binding |
| 47045 | RAP domain-like                                                           | 47045~47045                               | Alpha-2-MRAP_N~Alpha-2-MRAP_C                                  |
| 47050 | VHP, Villin headpiece domain                                              | 57716~57716~57716~57716~57716~47050       | LIM~LIM~LIM~LIM~VHP                                            |
| 47055 | TAF(II)230 TBP-binding fragment                                           | 47055~47370~47370                         | TBP-binding~DUF3591~zf-CCHC_6~Bromodomain~Bromodomain          |
| 47060 | S15/NS1 RNA-binding domain                                                | 47060~143021                              | Flu_NS1                                                        |
| 47072 | Cysteine alpha-hairpin motif                                              | 47072                                     | COX17                                                          |
| 47077 | T4 endonuclease V                                                         | 47077                                     | Pyr_excise                                                     |
| 47082 | Fertilization protein                                                     | 47082                                     | Egg_lysin                                                      |
| 47090 | PGBD-like                                                                 | 47090                                     | Amidase_2~PG_binding_1                                         |
| 47095 | HMG-box                                                                   | 47095                                     | HMG_box                                                        |
| 47113 | Histone-fold                                                              | 47113                                     | CBFD_NFYB_HMF                                                  |
| 47144 | HSC20 (HSCB), C-terminal oligomerisation domain                           | 47144                                     | DnaJ~HSCB_C                                                    |
| 47148 | Diol dehydratase, gamma subunit                                           | 47148                                     | Dehydratase_SU                                                 |
| 47152 | Methane monooxygenase hydrolase, gamma subunit                            | 47152                                     | MeMO_Hyd_G                                                     |
| 47157 | Mitochondrial import receptor subunit Tom20                               | 47157                                     | MAS20                                                          |
| 47162 | Apolipoprotein                                                            | 47162                                     | Apolipoprotein                                                 |
| 47170 | Aspartate receptor, ligand-binding domain                                 | 47170                                     | TarH~HAMP~MCPsignal                                            |
| 47175 | Cytochromes                                                               | 47175                                     | Cytochrom_C_2                                                  |
| 47188 | Hemerythrin-like                                                          | 47188                                     | Hemerythrin                                                    |
| 47195 | TMV-like viral coat proteins                                              | 47195                                     | TMV_coat                                                       |

|       |                                                                              |                               |                                                                   |
|-------|------------------------------------------------------------------------------|-------------------------------|-------------------------------------------------------------------|
| 47203 | Acyl-CoA dehydrogenase C-terminal domain-like                                | 56645~47203                   | Acyl-CoA_dh_N~Acyl-CoA_dh_M~Acyl-CoA_dh_1                         |
| 47212 | FKBP12-rapamycin-binding domain of FKBP-rapamycin-associated protein (FRAP)  | 47212                         | DUF3385~FAT~Rapamycin_bind~P I3_PI4_kinase~FATC                   |
| 47216 | Proteasome activator                                                         | 47216                         | PA28_alpha~PA28_beta                                              |
| 47220 | alpha-catenin/vinculin-like                                                  | 47220~47220                   | Vinculin                                                          |
| 47226 | Histidine-containing phosphotransfer domain, HPT domain                      | 47226                         | Hpt                                                               |
| 47233 | Bacterial GAP domain                                                         | 47233                         | YopE~ADPrib_exo_Tox                                               |
| 47240 | Ferritin-like                                                                | 47240                         | Ferritin                                                          |
| 47266 | 4-helical cytokines                                                          | 47266                         | Interferon                                                        |
| 47323 | Anticodon-binding domain of a subclass of class I aminoacyl-tRNA synthetases | 52374~47323                   | tRNA-synt_1~Anticodon_1                                           |
| 47336 | ACP-like                                                                     | 47336                         | PP-binding                                                        |
| 47345 | Colicin E immunity proteins                                                  | 47345                         | Colicin_Pyocin                                                    |
| 47353 | Retrovirus capsid dimerization domain-like                                   | 47836~47943~47353~57756       | Gag_p17~Gag_p24~zf-CCHC~zf-CCHC~Gag_p6                            |
| 47364 | Domain of the SRP/SRP receptor G-proteins                                    | 47364~52540~47446             | SRP54_N~SRP54~SRP_SPB                                             |
| 47370 | Bromodomain                                                                  | 57903~47370                   | Bromodomain~Bromodomain~BET                                       |
| 47380 | ROP protein                                                                  | 47380                         | Rop                                                               |
| 47384 | Homodimeric domain of signal transducing histidine kinase                    | 47384~55874                   | HAMP~HisKA~HATPase_c                                              |
| 47391 | Dimerization-anchoring domain of cAMP-dependent PK regulatory subunit        | 47391~51206~51206             | RIIa~cNMP_binding~cNMP_bindin g                                   |
| 47396 | Transcription factor IIA (TFIIA), alpha-helical domain                       | 47396~50784                   | TFIIA_gamma_N~TFIIA_gamma_C                                       |
| 47401 | Ectatomin subunits                                                           | 47401                         | Ectatomin                                                         |
| 47406 | SinR repressor dimerisation domain-like                                      | 47413~47406                   | HTH_3~SinI                                                        |
| 47413 | lambda repressor-like DNA-binding domains                                    | 47413                         | HTH_3                                                             |
| 47446 | Signal peptide-binding domain                                                | 47364~52540~47446             | SRP54_N~SRP54~SRP_SPB                                             |
| 47454 | A DNA-binding domain in eukaryotic transcription factors                     | 47454                         | bZIP_Maf                                                          |
| 47459 | HLH, helix-loop-helix DNA-binding domain                                     | 47459                         | HLH                                                               |
| 47473 | EF-hand                                                                      | 47473                         | EF-hand_7                                                         |
| 47565 | Insect pheromone/odorant-binding proteins                                    | 47565                         | PBP_GOBP                                                          |
| 47571 | Cloroperoxidase                                                              | 47571                         | Peroxidase_2                                                      |
| 47576 | Calponin-homology domain, CH-domain                                          | 47576                         | CH                                                                |
| 47587 | Domain of poly(ADP-ribose) polymerase                                        | 142921~47587~56399            | WGR~PARP_reg~PARP                                                 |
| 47592 | SWIB/MDM2 domain                                                             | 47592                         | SWIB                                                              |
| 47598 | Ribbon-helix-helix                                                           | 47598                         | Pro_dh-DNA_bdg~Pro_dh~Aldedh                                      |
| 47616 | GST C-terminal domain-like                                                   | 52833~47616                   | GST_N~GST_C                                                       |
| 47644 | Methionine synthase domain                                                   | 82282~51717~47644~52242~56507 | S-methyl_trans~Pterin_bind~B12-binding_2~B12-binding~Met_synt_B12 |
| 47648 | Nucleoside phosphorylase/phosphoribosyltransferase N-terminal domain         | 47648~52418                   | Glycos_trans_3N~Glycos_transf_3                                   |

|       |                                                                             |                               |                                                               |
|-------|-----------------------------------------------------------------------------|-------------------------------|---------------------------------------------------------------|
| 47655 | STAT                                                                        | 48092~47655~49417~55550       | STAT_int~STAT_alpha~STAT_bind~SH2                             |
| 47661 | t-snare proteins                                                            | 47661                         | Syntaxin~SNARE                                                |
| 47668 | N-terminal domain of cbl (N-cbl)                                            | 47668~47473~55550             | Cbl_N~Cbl_N2~Cbl_N3~zf-C3HC4_3                                |
| 47672 | Transferrin receptor-like dimerisation domain                               | 52025~53187~47672             | PA~Peptidase_M28~TFR_dimer                                    |
| 47676 | Conserved domain common to transcription factors TFIIIS, elongin A, CRSP70  | 47676                         | Med26~TFIIIS_M~TFIIIS_C                                       |
| 47681 | C-terminal domain of B transposition protein                                | 47681                         | AAA_22~Phage-MuB_C                                            |
| 47686 | Anaphylotoxins (complement system)                                          | 47686~48239~50242             | A2M_N~A2M_N_2~ANATO~A2M~Thiol-ester_cl~A2M_comp~A2M_recep~NTR |
| 47694 | Cytochrome c oxidase subunit h                                              | 47694                         | COX6B                                                         |
| 47699 | Bifunctional inhibitor/lipid-transfer protein/seed storage 2S albumin       | 47699                         | Tryp_alpha_amyl                                               |
| 47719 | p53 tetramerization domain                                                  | 49417~47719                   | P53_TAD~P53~P53_tetramer                                      |
| 47724 | Domain of early E2A DNA-binding protein, ADDBP                              | 47724~57917~57917             | Viral_DNA_bi~Viral_DNA_Zn_bi~Viral_DNA_Zn_bi                  |
| 47729 | IHF-like DNA-binding proteins                                               | 47729                         | Bac_DNA_binding                                               |
| 47741 | CO dehydrogenase ISP C-domain like                                          | 54292~47741                   | Fer2_2                                                        |
| 47752 | Protein HNS-dependent expression A; HdeA                                    | 47752                         | HdeA                                                          |
| 47757 | Chemotaxis receptor methyltransferase CheR, N-terminal domain               | 47757~53335                   | CheR_N~CheR                                                   |
| 47762 | PAH2 domain                                                                 | 47762                         | PAH~PAH~PAH~Sin3_corepress~Sin3a_C                            |
| 47769 | SAM/Pointed domain                                                          | 47769                         | SAM_1                                                         |
| 47781 | RuvA domain 2-like                                                          | 47781                         | DNA_ligase_aden~DNA_ligase_OB~DNA_ligase_ZBD~HHH_2~BRCT       |
| 47789 | C-terminal domain of RNA polymerase alpha subunit                           | 56553~47789                   | RNA_pol_A_bac~RNA_pol_A_CTD                                   |
| 47794 | Rad51 N-terminal domain-like                                                | 69705~54814~54814~47794~47794 | NusA_N~S1~KH_5~HHH_5                                          |
| 47798 | Barrier-to-autointegration factor, BAF                                      | 47798                         | BAF                                                           |
| 47802 | DNA polymerase beta, N-terminal domain-like                                 | 47802~81585~81301             | HHH_8~DNA_pol_lambd_f~DNA_pol_B_palm~DNA_pol_B_thumb          |
| 47807 | 5' to 3' exonuclease, C-terminal subdomain                                  | 88723~47807~53098~56672       | 5_3_exonuc_N~5_3_exonuc~DNA_pol_A                             |
| 47819 | HRDC-like                                                                   | 52540~52540~46785~47819       | DEAD~Helicase_C~RecQ_Zn_bind~RQC~HRDC                         |
| 47823 | lambda integrase-like, N-terminal domain                                    | 47823~56349                   | Phage_int_SAM_1~Phage_integrase                               |
| 47831 | Enzyme I of the PEP:sugar phosphotransferase system HPr-binding (sub)domain | 47831~52009                   | PEP-utilisers_N~PEP-utilizers~PEP-utilizers_C                 |
| 47836 | Retroviral matrix proteins                                                  | 47836~47943~47353~57756       | Gag_p17~Gag_p24~zf-CCHC~zf-CCHC~Gag_p6                        |
| 47852 | Hepatitis B viral capsid (hbcag)                                            | 47852                         | Hep_core_N                                                    |
| 47857 | Apolipoprotein III                                                          | 47857                         | ApoLp-III                                                     |

|       |                                                                    |                                     |                                                                   |
|-------|--------------------------------------------------------------------|-------------------------------------|-------------------------------------------------------------------|
| 47862 | Saposin                                                            | 47862                               | SapA~SapB_1~SapB_2~SapB_1~SapB_2~SapB_1~SapB_2~SapB_1~SapB_2~SapA |
| 47869 | Bacteriocin AS-48                                                  | 47869                               | Bacteriocin_Ild                                                   |
| 47874 | Annexin                                                            | 47874                               | Annexin~Annexin~Annexin~Annexin                                   |
| 47895 | Transducin (alpha subunit), insertion domain                       | 47895~52540                         | G-alpha                                                           |
| 47912 | Wiscott-Aldrich syndrome protein, WASP, C-terminal domain          | 50729~47912~47912                   | WH1~PBD~WH2                                                       |
| 47917 | C-terminal domain of alpha and beta subunits of F1 ATP synthase    | 50615~52540~47917                   | ATP-synt_ab_N~ATP-synt_ab~ATP-synt_ab_C                           |
| 47923 | Ypt/Rab-GAP domain of gyp1p                                        | 47923                               | RabGAP-TBC                                                        |
| 47928 | N-terminal domain of the delta subunit of the F1F0-ATP synthase    | 47928                               | OSCP                                                              |
| 47933 | ERP29 C domain-like                                                | 52833~52833~47933                   | Thioredoxin~Thioredoxin~ERp29                                     |
| 47938 | Functional domain of the splicing factor Prp18                     | 47938                               | Prp18                                                             |
| 47943 | Retrovirus capsid protein, N-terminal core domain                  | 47836~47943~47353~57756             | Gag_p17~Gag_p24~zf-CCHC~zf-CCHC~Gag_p6                            |
| 47954 | Cyclin-like                                                        | 47954~47954                         | Cyclin_N~Cyclin_C                                                 |
| 47973 | Ribosomal protein S7                                               | 47973                               | Ribosomal_S7                                                      |
| 47979 | Iron-dependent repressor protein, dimerization domain              | 46785~47979                         | Fe_dep_repress~Fe_dep_repr_C~FeoA                                 |
| 47986 | DEATH domain                                                       | 47986                               | I-set~TSP_1~TSP_1~ZU5~Death                                       |
| 48008 | GntR ligand-binding domain-like                                    | 46785~48008                         | GntR~FCD                                                          |
| 48013 | NusB-like                                                          | 48013                               | NusB                                                              |
| 48019 | post-AAA+ oligomerization domain-like                              | 52540~48019                         | AAA~AAA_assoc_2~MgsA_C                                            |
| 48024 | N-terminal domain of DnaB helicase                                 | 48024                               | DnaB~DnaB_C                                                       |
| 48029 | FliG                                                               | 48029                               | FliG_N~FliG_M~FliG_C                                              |
| 48034 | Guanido kinase N-terminal domain                                   | 48034~55931                         | ATP-gua_PtransN~ATP-gua_Ptrans                                    |
| 48045 | Scaffolding protein gpD of bacteriophage procapsid                 | 48045                               | gpD                                                               |
| 48050 | Hemocyanin, N-terminal domain                                      | 48050~48056~81296                   | Hemocyanin_N~Hemocyanin_M~Hemocyanin_C                            |
| 48056 | Di-copper centre-containing domain                                 | 48056                               | Hemocyanin_N~Hemocyanin_M~Hemocyanin_C                            |
| 48065 | DBL homology domain (DH-domain)                                    | 48065~50729                         | RhoGEF                                                            |
| 48076 | LigA subunit of an aromatic-ring-opening dioxygenase LigAB         | 48076                               | LigA                                                              |
| 48081 | Methyl-coenzyme M reductase alpha and beta chain C-terminal domain | 48081                               | MCR_alpha                                                         |
| 48092 | Transcription factor STAT-4 N-domain                               | 48092~47655~49417~55550             | STAT_int~STAT_alpha~STAT_bind~SH2                                 |
| 48097 | Regulator of G-protein signaling, RGS                              | 48097                               | RGS                                                               |
| 48108 | Carbamoyl phosphate synthetase, large subunit connection domain    | 52440~56059~48108~52440~56059~52335 | CPSase_L_D2~CPSase_L_D3~CPSase_L_D2~MGS                           |
| 48113 | Heme-dependent peroxidases                                         | 48113                               | peroxidase                                                        |
| 48140 | Ribosomal protein L19 (L19e)                                       | 48140                               | Ribosomal_L19e                                                    |
| 48145 | Influenza virus matrix protein M1                                  | 48145                               | Flu_M1~Flu_M1_C                                                   |
| 48150 | DNA-glycosylase                                                    | 48150                               | Adenine_glyco                                                     |
| 48163 | An anticodon-binding domain of class I aminoacyl-tRNA synthetases  | 52374~48163                         | tRNA-synt_1c                                                      |

|       |                                                                          |                         |                                                                                     |
|-------|--------------------------------------------------------------------------|-------------------------|-------------------------------------------------------------------------------------|
| 48168 | R1 subunit of ribonucleotide reductase, N-terminal domain                | 48168~51998             | RNR_N~Ribonuc_red_IgN~Ribonuc_red_IgC                                               |
| 48173 | Cryptochrome/photolyase FAD-binding domain                               | 52425~48173             | DNA_photolyase~FAD_binding_7                                                        |
| 48179 | 6-phosphogluconate dehydrogenase C-terminal domain-like                  | 51735~48179             | NAD_binding_2~NAD_binding_11                                                        |
| 48201 | Uteroglobin-like                                                         | 48201                   | Uteroglobin                                                                         |
| 48208 | Six-hairpin glycosidases                                                 | 48208                   | Glyco_hydro_9                                                                       |
| 48225 | Seven-hairpin glycosidases                                               | 48225                   | Glyco_hydro_47                                                                      |
| 48230 | Chondroitin AC/alginate lyase                                            | 48230~74650~49863       | Lyase_8_N~Lyase_8~Lyase_8_C                                                         |
| 48239 | Terpenoid cyclases/Protein prenyltransferases                            | 48239                   | SQHop_cyclase_N~SQHop_cyclase_C                                                     |
| 48256 | Citrate synthase                                                         | 48256                   | Citrate_synt                                                                        |
| 48264 | Cytochrome P450                                                          | 48264~52218~63380~52343 | p450                                                                                |
| 48295 | TrpR-like                                                                | 52540~48295             | DnaA_N~Bac_DnaA~Bac_DnaA_C                                                          |
| 48300 | Ribosomal protein L7/12, oligomerisation (N-terminal) domain             | 48300~54736             | Ribosomal_L12_N~Ribosomal_L12                                                       |
| 48305 | Class II MHC-associated invariant chain ectoplasmic trimerization domain | 48305~57610             | MHC2-interact~MHCassoc_trimer~Thyroglobulin_1                                       |
| 48310 | Aldehyde ferredoxin oxidoreductase, C-terminal domains                   | 56228~48310             | AFOR_N~AFOR_C                                                                       |
| 48317 | Acid phosphatase/Vanadium-dependent haloperoxidase                       | 48317                   |                                                                                     |
| 48334 | DNA repair protein MutS, domain III                                      | 55271~53150~48334~52540 | MutS_I~MutS_II~MutS_III~MutS_V                                                      |
| 48340 | Interferon-induced guanylate-binding protein 1 (GBP1), C-terminal domain | 52540~48340             | GBP~GBP_C                                                                           |
| 48345 | A virus capsid protein alpha-helical domain                              | 48345~48345             | Rota_Capsid_VP6                                                                     |
| 48350 | GTPase activation domain, GAP                                            | 48350                   | RhoGAP                                                                              |
| 48366 | Ras GEF                                                                  | 47113~48065~50729~48366 | Histone~RhoGEF~PH~RasGEF_N~RasGEF                                                   |
| 48371 | ARM repeat                                                               | 48371                   | B56                                                                                 |
| 48403 | Ankyrin repeat                                                           | 48403                   | Ank_2~Ank_5~Ank_2~Ank_2~Ank_4~Ank_3~Ank_2~Ank_5~Ank_4~Ank~Ank_5~Ank_2~ZU5~ZU5~Death |
| 48425 | Sec7 domain                                                              | 48425                   | Sec7~IQ_SEC7_PH                                                                     |
| 48431 | Lipovitellin-phosvitin complex, superhelical domain                      | 56968~48431~56968~56968 | Vitellogenin_N~DUF1943~DUF1944~VWD                                                  |
| 48435 | Bacterial muramidases                                                    | 48435~53955             | SLT_L~SLT                                                                           |
| 48439 | Protein prenyltransferase                                                | 48439                   | PPTA~PPTA~PPTA~PPTA                                                                 |
| 48445 | 14-3-3 protein                                                           | 48445                   | 14-03-2003                                                                          |
| 48452 | TPR-like                                                                 | 48452                   | DUF924                                                                              |
| 48464 | ENTH/VHS domain                                                          | 48464                   | ANTH                                                                                |
| 48479 | Cytochrome c oxidase subunit E                                           | 48479                   | COX5A                                                                               |
| 48484 | Lipoxygenase                                                             | 49723~48484             | PLAT~Lipoxygenase                                                                   |
| 48493 | gene 59 helicase assembly protein                                        | 48493                   | T4_Gp59_N~T4_Gp59_C                                                                 |
| 48498 | Tetracyclin repressor-like, C-terminal domain                            | 46689~48498             | TetR_N                                                                              |
| 48508 | Nuclear receptor ligand-binding domain                                   | 57716~48508             | zf-C4~Hormone_recep                                                                 |
| 48537 | Phospholipase C/P1 nuclease                                              | 48537                   | S1-P1_nuclease                                                                      |

|       |                                                            |                               |                                                                      |
|-------|------------------------------------------------------------|-------------------------------|----------------------------------------------------------------------|
| 48552 | Serum albumin-like                                         | 48552~48552~48552             | Serum_albumin~Serum_albumin~Serum_albumin                            |
| 48557 | L-aspartase-like                                           | 48557                         | Lyase_aromatic                                                       |
| 48576 | Terpenoid synthases                                        | 48576                         | polyprenyl_synt                                                      |
| 48592 | GroEL equatorial domain-like                               | 48592~52029~48592             | Cpn60_TCP1                                                           |
| 48600 | Chorismate mutase II                                       | 48600                         | CM_2                                                                 |
| 48608 | Peridinin-chlorophyll protein                              | 48608~48608                   | PCP~PCP                                                              |
| 48613 | Heme oxygenase-like                                        | 48613                         | TENA_THI-4                                                           |
| 48619 | Phospholipase A2, PLA2                                     | 48619                         | Phospholip_A2_1                                                      |
| 48647 | Fungal elicitor                                            | 48647                         | Elicitor                                                             |
| 48652 | Tetraspanin                                                | 48652                         | Tetraspanin                                                          |
| 48657 | FinO-like                                                  | 48657                         | ProQ                                                                 |
| 48662 | Ribosomal protein L39e                                     | 48662                         | Ribosomal_L39                                                        |
| 48666 | Methanol dehydrogenase subunit                             | 48666                         | MDH                                                                  |
| 48670 | Transducin (heterotrimeric G protein), gamma chain         | 48670                         | G-gamma                                                              |
| 48674 | Fe-only hydrogenase smaller subunit                        | 48674                         | Fe_hyd_Ssu                                                           |
| 48678 | Moesin tail domain                                         | 54236~47031~50729~48678       | FERM_N~FERM_M~FERM_C~ERM                                             |
| 48686 | Proteinase A inhibitor IA3                                 | 48686                         | Inhibitor_I34                                                        |
| 48690 | Epsilon subunit of mitochondrial F1F0-ATP synthase         | 48690                         | ATP-synt_Eps                                                         |
| 48695 | Multiheme cytochromes                                      | 48695                         | Cytochrom_C552                                                       |
| 48726 | Immunoglobulin                                             | 48726                         | V-set                                                                |
| 49265 | Fibronectin type III                                       | 49265                         | fn3                                                                  |
| 49299 | PKD domain                                                 | 49299                         | Sortilin-Vps10~Sortilin_C~PKD                                        |
| 49303 | beta-Galactosidase/glucuronidase domain                    | 49785~49303~51445~49303~74650 | Glyco_hydro_2_N~Glyco_hydro_2~Glyco_hydro_2_C~DUF4981~Bgal_small_N   |
| 49309 | Transglutaminase, two C-terminal domains                   | 81296~54001~49309~49309       | Transglut_N~Transglut_C~Transglut_C                                  |
| 49313 | Cadherin-like                                              | 49313~49313                   | Cadherin_2~Cadherin~Cadherin~Cadherin~Cadherin~Cadherin~Cadherin_C_2 |
| 49319 | Actinoxanthin-like                                         | 49319                         | Neocarzinostat                                                       |
| 49329 | Cu,Zn superoxide dismutase-like                            | 49329                         | Sod_Cu                                                               |
| 49344 | CBD9-like                                                  | 49344                         | CDH-cyt                                                              |
| 49348 | Clathrin adaptor appendage domain                          | 48371~49348~55711             | Adaptin_N~Alpha_adaptinC2                                            |
| 49354 | PapD-like                                                  | 49354~49584                   | PapD_N~PapD_C                                                        |
| 49363 | Purple acid phosphatase, N-terminal domain                 | 49363~56300                   | Pur_ac_phosph_N~Metallophos~Metallophos_C                            |
| 49367 | Superoxide reductase-like                                  | 49367                         | Desulfoferrod_N~Desulfoferrodox                                      |
| 49373 | Invasin/intimin cell-adhesion fragments                    | 49373                         | Invasin_beta~Invasin_D3~Big_1~Big_1~Big_1~Big_1                      |
| 49380 | Diphtheria toxin, C-terminal domain                        | 56399~56845~49380             | Diphtheria_C~Diphtheria_T~Diphtheria_R                               |
| 49384 | Carbohydrate-binding domain                                | 49384                         | CBM_2                                                                |
| 49401 | Bacterial adhesins                                         | 49401                         | Fimbrial                                                             |
| 49410 | Alpha-macroglobulin receptor domain                        | 48239~49410                   | A2M_N~A2M_N_2~A2M~Thiolester_cl~A2M_comp~A2M_recep                   |
| 49417 | p53-like transcription factors                             | 49417                         | T-box                                                                |
| 49441 | Cytochrome f, large domain                                 | 49441~51246~103431            | Apocytochr_F_N~Apocytochr_F_C                                        |
| 49447 | Second domain of Mu2 adaptin subunit (ap50) of ap2 adaptor | 64356~49447                   | Clat_adaptor_s~Adap_comp_sub                                         |
| 49452 | Starch-binding domain-like                                 | 49452                         | PUD~CBM_48                                                           |

|       |                                                            |                                     |                                                                    |
|-------|------------------------------------------------------------|-------------------------------------|--------------------------------------------------------------------|
| 49464 | Carboxypeptidase regulatory domain-like                    | 49464                               | CarbopepD_reg_2~Plug                                               |
| 49468 | VHL                                                        | 49468                               | VHL                                                                |
| 49472 | Transthyretin (synonym: prealbumin)                        | 49472                               | Transthyretin                                                      |
| 49478 | Cna protein B-type domain                                  | 49478                               | Collagen_bind~Cna_B                                                |
| 49482 | Aromatic compound dioxygenase                              | 49482                               | Dioxygenase_N~Dioxygenase_C                                        |
| 49493 | HSP40/DnaJ peptide-binding domain                          | 46565~57938~49493                   | DnaJ~DnaJ_C                                                        |
| 49498 | alpha-Amylase inhibitor tendamistat                        | 49498                               | A_amylase_inhib                                                    |
| 49503 | Cupredoxins                                                | 49503                               | Cu-oxidase_3~Cu-oxidase~Cu-oxidase_2                               |
| 49562 | C2 domain (Calcium/lipid-binding domain, CaLB)             | 49562                               | C2~C2                                                              |
| 49584 | Periplasmic chaperone C-domain                             | 49354~49584                         | PapD_N~PapD_C                                                      |
| 49590 | PHL pollen allergen                                        | 50685~49590                         | DPBB_1~Pollen_allerg_1                                             |
| 49594 | Rab geranylgeranyltransferase alpha-subunit, insert domain | 48439~49594~52058                   | PPTA~PPTA~PPTA~PPTA~RabGG_T_insert                                 |
| 49599 | TRAF domain-like                                           | 49599                               | Sina                                                               |
| 49606 | Neurophysin II                                             | 49606                               | Hormone_4~Hormone_5                                                |
| 49695 | gamma-Crystallin-like                                      | 49695~49695                         | Crystall~Crystall                                                  |
| 49723 | Lipase/lipoxygenase domain (PLAT/LH2 domain)               | 49723~48484                         | PLAT~Lipoxygenase                                                  |
| 49742 | PHM/PNGase F                                               | 49742~49742                         | DOMON~Cu2_monooxygen~Cu2_monoox_C                                  |
| 49749 | Group II dsDNA viruses VP                                  | 49749                               | Adeno_hexon~Adeno_hexon_C                                          |
| 49758 | Calpain large subunit, middle domain (domain III)          | 54001~49758~47473                   | Peptidase_C2~Calpain_III~EF-hand_8                                 |
| 49764 | HSP20-like chaperones                                      | 49764                               | HSP20                                                              |
| 49772 | Ecotin, trypsin inhibitor                                  | 49772                               | Ecotin                                                             |
| 49777 | PEBP-like                                                  | 49777                               | PBP                                                                |
| 49785 | Galactose-binding domain-like                              | 49785                               | Glyco_hydro_2_N~Glyco_hydro_2~Glyco_hydro_2_C~DUF4981~Bgal_small_N |
| 49818 | Viral protein domain                                       | 49818                               | Hemagglutinin                                                      |
| 49830 | ENV polyprotein, receptor-binding domain                   | 49830                               | TLV_coat                                                           |
| 49835 | Virus attachment protein globular domain                   | 49835                               | Adeno_knob                                                         |
| 49842 | TNF-like                                                   | 49842                               | TNF                                                                |
| 49854 | Spermadhesin, CUB domain                                   | 49854~57196~49854~57535~57535~50494 | CUB~CUB~F5_F8_type_C~F5_F8_type_C~MAM~DUF3481                      |
| 49863 | Hyaluronate lyase-like, C-terminal domain                  | 48230~74650~49863                   | Lyase_8_N~Lyase_8~Lyase_8_C                                        |
| 49870 | Osmotin, thaumatin-like protein                            | 49870                               | Thaumatoin                                                         |
| 49879 | SMAD/FHA domain                                            | 49879                               | FHA                                                                |
| 49889 | Soluble secreted chemokine inhibitor, VCCI                 | 49889                               | Orthopox_35kD                                                      |
| 49894 | Baculovirus p35 protein                                    | 49894                               | P35                                                                |
| 49899 | Concanavalin A-like lectins/glucanases                     | 49899                               | Glyco_hydro_16~XET_C                                               |
| 49998 | Amine oxidase catalytic domain                             | 54416~49998                         | Cu_amine_oxidN2~Cu_amine_oxidN3~Cu_amine_oxid                      |
| 50012 | EV matrix protein                                          | 50012~50012                         | VP40                                                               |
| 50017 | gp9                                                        | 50017                               | T4_gp9_10                                                          |
| 50022 | ISP domain                                                 | 50022                               | Rieske                                                             |
| 50037 | C-terminal domain of transcriptional repressors            | 46785~55681~50037                   | HTH_11~BPL_LplA_LipB~BPL_C                                         |

|       |                                                                 |                                     |                                               |
|-------|-----------------------------------------------------------------|-------------------------------------|-----------------------------------------------|
| 50044 | SH3-domain                                                      | 50044                               | SH3_1~SH2~Pkinase_Tyr                         |
| 50084 | Myosin S1 fragment, N-terminal domain                           | 50084~52540                         | Myosin_N~Myosin_head~Myosin_tail_1            |
| 50090 | Electron transport accessory proteins                           | 50090                               | NHase_beta                                    |
| 50104 | Translation proteins SH3-like domain                            | 50104                               | Ribosomal_L2~Ribosomal_L2_C                   |
| 50118 | Cell growth inhibitor/plasmid maintenance toxic component       | 50118                               | PemK_toxin                                    |
| 50122 | DNA-binding domain of retroviral integrase                      | 50630~56672~53098~46919~53098~50122 | Integrase_Zn~rve~IN_DBD_C                     |
| 50129 | GroES-like                                                      | 50129~51735                         | ADH_N~ADH_zinc_N                              |
| 50151 | SacY-like RNA-binding domain                                    | 50151~63520~63520                   | CAT_RBD~PRD~PRD                               |
| 50156 | PDZ domain-like                                                 | 50156                               | Trypsin_2~PDZ_2                               |
| 50176 | N-terminal domains of the minor coat protein g3p                | 50176                               | Phage_Coat_A~Phage_Coat_A                     |
| 50182 | Sm-like ribonucleoproteins                                      | 50182                               | LSM                                           |
| 50193 | Ribosomal protein L14                                           | 50193                               | Ribosomal_L14                                 |
| 50199 | Staphylococcal nuclease                                         | 50199                               | SNase                                         |
| 50203 | Bacterial enterotoxins                                          | 50203~54334                         | SSL_OB                                        |
| 50242 | TIMP-like                                                       | 50242                               | TIMP                                          |
| 50249 | Nucleic acid-binding proteins                                   | 50249                               | tRNA_anti-codon~tRNA-synt_2                   |
| 50324 | Inorganic pyrophosphatase                                       | 50324                               | Pyrophosphatase                               |
| 50331 | MOP-like                                                        | 52540~50331                         | ABC_tran~TOBE_2                               |
| 50341 | CheW-like                                                       | 50341                               | CheW                                          |
| 50346 | PRC-barrel domain                                               | 50447~50346                         | RimM~PRC                                      |
| 50353 | Cytokine                                                        | 50353                               | FGF                                           |
| 50370 | Ricin B-like lectins                                            | 50370                               | Glycos_transf_2~Ricin_B_lectin                |
| 50382 | Agglutinin                                                      | 50382                               | Agglutinin                                    |
| 50386 | STI-like                                                        | 50386                               | Kunitz_legume                                 |
| 50405 | Actin-crosslinking proteins                                     | 50405~50405~50405~50405             | Fascin~Fascin~Fascin~Fascin                   |
| 50443 | FucI/AraA C-terminal domain-like                                | 53743~50443                         | Arabinose_Isome~Arabinose_Iso_C               |
| 50447 | Translation proteins                                            | 52540~50447~50465                   | GTP_EFTU~GTP_EFTU_D2~GTP_EFTU_D3              |
| 50465 | EF-Tu/eEF-1alpha/eIF2-gamma C-terminal domain                   | 52540~50447~50465                   | GTP_EFTU~GTP_EFTU_D2~GTP_EFTU_D3              |
| 50475 | FMN-binding split barrel                                        | 50475                               | Flavin_Reduct                                 |
| 50486 | FMT C-terminal domain-like                                      | 53328~50486                         | Formyl_trans_N~Formyl_trans_C                 |
| 50494 | Trypsin-like serine proteases                                   | 50494                               | Trypsin                                       |
| 50610 | mu transposase, C-terminal domain                               | 46955~46689~46689~53098~50610       | HTH_Tnp_Mu_1~HTH_Tnp_Mu_2~DDE_2~Mu-transpos_C |
| 50615 | N-terminal domain of alpha and beta subunits of F1 ATP synthase | 50615~52540~47917                   | ATP-synt_ab_N~ATP-synt_ab~ATP-synt_ab_C       |
| 50621 | Alanine racemase C-terminal domain-like                         | 51419~50621                         | Ala_racemase_N~Ala_racemase_C                 |
| 50630 | Acid proteases                                                  | 50630                               | Asp                                           |
| 50677 | ValRS/IleRS/LeuRS editing domain                                | 50677~47323                         | tRNA-synt_1_2~Anticodon_1                     |
| 50685 | Barwin-like endoglucanases                                      | 50685                               | MltA~3D                                       |
| 50692 | ADC-like                                                        | 53706~50692                         | Molybdopterin~Molybdop_binding                |
| 50715 | Ribosomal protein L25-like                                      | 50715                               | Ribosomal_L25p~Ribosomal_TL5_C                |
| 50723 | Core binding factor beta, CBF                                   | 50723                               | CBF_beta                                      |
| 50729 | PH domain-like                                                  | 50729                               | PH                                            |
| 50784 | Transcription factor IIA (TFIIA), beta-barrel domain            | 47396~50784                         | TFIIA                                         |





|       |                                                         |                   |                                       |
|-------|---------------------------------------------------------|-------------------|---------------------------------------|
| 51096 | delta-Endotoxin (insectocide), middle domain            | 56849~51096~49785 | Endotoxin_N~Endotoxin_M~Endotoxin_C   |
| 51101 | Mannose-binding lectins                                 | 51101             | Jacalin                               |
| 51110 | alpha-D-mannose-specific plant lectins                  | 51110             | B_lectin                              |
| 51120 | beta-Roll                                               | 55486~51120       | Peptidase_M10_C                       |
| 51126 | Pectin lyase-like                                       | 51126             | Glyco_hydro_28                        |
| 51156 | Insect cysteine-rich antifreeze protein                 | 51156             | AFP~AFP~AFP~AFP~AFP~AFP               |
| 51161 | Trimeric LpxA-like enzymes                              | 51161             | Hexapep                               |
| 51177 | An insect antifreeze protein                            | 51177             | CfAFP                                 |
| 51182 | RmlC-like cupins                                        | 51182             | Cupin_2                               |
| 51197 | Clavaminate synthase-like                               | 51197             | DIOX_N~2OG-FeII_Oxy                   |
| 51206 | cAMP-binding domain-like                                | 51206             | cNMP_binding~HTH_Crp_2                |
| 51215 | Regulatory protein AraC                                 | 51215             | AraC_binding~HTH_18                   |
| 51219 | TRAP-like                                               | 51219             | AIM24                                 |
| 51225 | Fibre shaft of virus attachment proteins                | 51225~49835       | Reo_sigma1                            |
| 51230 | Single hybrid motif                                     | 51230~47005~52777 | Biotin_lipoyl~E3_binding~2-oxoacid_dh |
| 51246 | Rudiment single hybrid motif                            | 52440~56059~51246 | ATP-grasp                             |
| 51261 | Duplicated hybrid motif                                 | 55604~51261       | PTS_EIIC~PTS_EIIB~PTS_EIIA_1          |
| 51269 | AFP III-like domain                                     | 51569~51269       | NeuB~SAF                              |
| 51274 | Head decoration protein D (gpD, major capsid protein D) | 51274             | HDPD                                  |
| 51278 | Urease, beta-subunit                                    | 51278             | Urease_beta                           |
| 51283 | dUTPase-like                                            | 51283             | dUTPase                               |
| 51289 | Tlp20, baculovirus telokin-like protein                 | 51289             | TLP-20                                |
| 51294 | Hedgehog/intein (Hint) domain                           | 51294             | PT-HINT                               |
| 51306 | LexA/Signal peptidase                                   | 51306             | Peptidase_S24                         |
| 51316 | Mss4-like                                               | 51316             | PMSR~SelR                             |
| 51322 | Cyanovirin-N                                            | 51322             | CVNH                                  |
| 51327 | Head-binding domain of phage P22 tailspike protein      | 51327             | Head_binding                          |
| 51332 | E2 regulatory, transactivation domain                   | 51332~54957       | PPV_E2_N~PPV_E2_C                     |
| 51338 | Composite domain of metallo-dependent hydrolases        | 51338~51556       | Amidohydro_1                          |
| 51344 | Epsilon subunit of F1F0-ATP synthase N-terminal domain  | 51344             | ATP-synt_DE_N~ATP-synt_DE             |
| 51351 | Triosephosphate isomerase (TIM)                         | 51351             | TIM                                   |
| 51366 | Ribulose-phosphate binding barrel                       | 51366             | His_biosynth                          |
| 51391 | Thiamin phosphate synthase                              | 51391             | TMP-TENI                              |
| 51395 | FMN-linked oxidoreductases                              | 51395             | Oxidored_FMN                          |
| 51412 | Inosine monophosphate dehydrogenase (IMPDH)             | 54631~51412       | IMPDH                                 |
| 51419 | PLP-binding barrel                                      | 51419~50621       | Ala_racemase_N~Ala_racemase_C         |
| 51430 | NAD(P)-linked oxidoreductase                            | 51430             | Aldo_ket_red                          |
| 51445 | (Trans)glycosidases                                     | 51445             | Glyco_hydro_1                         |
| 51556 | Metallo-dependent hydrolases                            | 51556             | Amidohydro_1                          |
| 51569 | Aldolase                                                | 51569             | DAHP_synth_1                          |
| 51604 | Enolase C-terminal domain-like                          | 54826~51604       | MR_MLE_N~MR_MLE_C                     |
| 51621 | Phosphoenolpyruvate/pyruvate domain                     | 51621             | HpcH_HpaI                             |
| 51645 | Malate synthase G                                       | 51645             | Malate_synthase                       |

|       |                                                                 |                         |                                                                   |
|-------|-----------------------------------------------------------------|-------------------------|-------------------------------------------------------------------|
| 51649 | RuBisCo, C-terminal domain                                      | 54966~51649             | RuBisCO_large_N~RuBisCO_large                                     |
| 51658 | Xylose isomerase-like                                           | 51658                   | AP_endonuc_2                                                      |
| 51679 | Bacterial luciferase-like                                       | 51679                   | Bac_luciferase                                                    |
| 51690 | Nicotinate/Quinolate PRTase C-terminal domain-like              | 54675~51690             | NAPRTase                                                          |
| 51695 | PLC-like phosphodiesterases                                     | 51695                   | GDPD                                                              |
| 51703 | Cobalamin (vitamin B12)-dependent enzymes                       | 51703~52242             | MM_CoA_mutase~B12-binding                                         |
| 51713 | tRNA-guanine transglycosylase                                   | 51713                   | TGT                                                               |
| 51717 | Dihydropteroate synthetase-like                                 | 51717                   | Pterin_bind                                                       |
| 51726 | UROD/MetE-like                                                  | 51726                   | URO-D                                                             |
| 51730 | FAD-linked oxidoreductase                                       | 51730                   | MTHFR                                                             |
| 51735 | NAD(P)-binding Rossmann-fold domains                            | 51735                   | adh_short                                                         |
| 51905 | FAD/NAD(P)-binding domain                                       | 51905                   | Pyr_redox_2~Pyr_redox_dim                                         |
| 51971 | Nucleotide-binding domain                                       | 51971                   | NAD_binding_8~GLF                                                 |
| 51984 | MurCD N-terminal domain                                         | 51984~53623~53244       | Mur_ligase~Mur_ligase_M~Mur_ligase_C                              |
| 51989 | Glycosyl hydrolases family 6, cellulases                        | 51989                   | Glyco_hydro_6                                                     |
| 51998 | PFL-like glycy radical enzymes                                  | 51998                   | PFL-like~Gly_radical                                              |
| 52009 | Phosphohistidine domain                                         | 56059~52009~51621       | PEP-utilisers_N~PEP-utilizers~PEP-utilizers_C                     |
| 52016 | LeuD/IlvD-like                                                  | 53732~52016             | Aconitase~Aconitase_C                                             |
| 52021 | Carbamoyl phosphate synthetase, small subunit N-terminal domain | 52021~52317             | CPSase_sm_chain~GATase                                            |
| 52025 | PA domain                                                       | 52025~53187~47672       | PA~Peptidase_M28~TFR_dimer                                        |
| 52029 | GroEL apical domain-like                                        | 52029                   | Cpn60_TCP1                                                        |
| 52038 | Barstar-related                                                 | 52038                   | Barstar                                                           |
| 52042 | Ribosomal protein L32e                                          | 52042                   | Ribosomal_L32e                                                    |
| 52047 | RNI-like                                                        | 52047                   | Tropomodulin                                                      |
| 52058 | L domain-like                                                   | 52058                   | LRR_9                                                             |
| 52075 | Outer arm dynein light chain 1                                  | 52075                   | LRR_4                                                             |
| 52080 | Ribosomal proteins L15p and L18e                                | 52080                   | Ribosomal_L18e                                                    |
| 52087 | CRAL/TRIO domain                                                | 46938~52087             | CRAL_TRIO                                                         |
| 52091 | SpoIIaa-like                                                    | 52091                   | STAS                                                              |
| 52096 | ClpP/crotonase                                                  | 52096                   | ECH_1                                                             |
| 52113 | BRCT domain                                                     | 56091~50249~47781~52113 | DNA_ligase_aden~DNA_ligase_OB~DNA_ligase_ZBD~HHH_2~BRCT           |
| 52121 | Lumazine synthase                                               | 52121                   | DMRL_synthase                                                     |
| 52129 | Caspase-like                                                    | 52129                   | Peptidase_C14                                                     |
| 52141 | Uracil-DNA glycosylase-like                                     | 52141                   | UDG                                                               |
| 52151 | FabD/lysophospholipase-like                                     | 52151                   | Acyl_transf_1                                                     |
| 52156 | Initiation factor IF2/eIF5b, domain 3                           | 52540~52156~50447       | IF2_N~IF2_N~GTP_EFTU~IF-2                                         |
| 52161 | Ribosomal protein L13                                           | 52161                   | Ribosomal_L13                                                     |
| 52166 | Ribosomal protein L4                                            | 52166                   | Ribosomal_L4                                                      |
| 52172 | CheY-like                                                       | 52172~46894             | Response_reg~Trans_reg_C                                          |
| 52200 | Toll/Interleukin receptor TIR domain                            | 52058~52200             | LRR_8~LRR_8~TIR                                                   |
| 52206 | Hypothetical protein MTH538                                     | 52206                   | TIR_2                                                             |
| 52210 | Succinyl-CoA synthetase domains                                 | 51735~52210             | CoA_binding~Ligase_CoA                                            |
| 52218 | Flavoproteins                                                   | 52218                   | FMN_red                                                           |
| 52242 | Cobalamin (vitamin B12)-binding domain                          | 51703~52242             | S-methyl_trans~Pterin_bind~B12-binding_2~B12-binding~Met_synt_B12 |

|       |                                                                                      |                                     |                                              |
|-------|--------------------------------------------------------------------------------------|-------------------------------------|----------------------------------------------|
| 52255 | N5-CAIR mutase (phosphoribosylaminoimidazole carboxylase, PurE)                      | 52255                               | AIRC                                         |
| 52266 | SGNH hydrolase                                                                       | 52266                               | Lipase_GDSL_2                                |
| 52279 | Beta-D-glucan exohydrolase, C-terminal domain                                        | 51445~52279                         | Glyco_hydro_3~Glyco_hydro_3_C                |
| 52283 | Formate/glycerate dehydrogenase catalytic domain-like                                | 52283~51735                         | 2-Hacid_dh_C                                 |
| 52304 | Type II 3-dehydroquinate dehydratase                                                 | 52304                               | DHquinase_II                                 |
| 52309 | N-(deoxy)ribosyltransferase-like                                                     | 52309                               | Nuc_deoxyrib_tr                              |
| 52313 | Ribosomal protein S2                                                                 | 52313                               | Ribosomal_S2                                 |
| 52317 | Class I glutamine amidotransferase-like                                              | 52317                               | DJ-1_PfpI                                    |
| 52335 | Methylglyoxal synthase-like                                                          | 52440~56059~48108~52440~56059~52335 | CPSase_L_D2~CPSase_L_D3~CPSase_L_D2~MGS      |
| 52343 | Ferredoxin reductase-like, C-terminal NADP-linked domain                             | 63380~52343                         | FAD_binding_6~NAD_binding_1                  |
| 52374 | Nucleotidylyl transferase                                                            | 52374                               | CTP_transf_like                              |
| 52402 | Adenine nucleotide alpha hydrolases-like                                             | 52402                               | Usp                                          |
| 52413 | UDP-glucose/GDP-mannose dehydrogenase C-terminal domain                              | 51735~48179~52413                   | UDPG_MGDP_dh_N~UDPG_MGDP_P_dh~UDPG_MGDP_dh_C |
| 52418 | Nucleoside phosphorylase/phosphoribosyltransferase catalytic domain                  | 47648~52418                         | Glycos_trans_3N~Glycos_transf_3              |
| 52425 | Cryptochrome/photolyase, N-terminal domain                                           | 52425~48173                         | DNA_photolyase~FAD_binding_7                 |
| 52440 | PreATP-grasp domain                                                                  | 52440~56059~51246                   | Dala_Dala_lig_N~Dala_Dala_lig_C              |
| 52467 | DHS-like NAD/FAD-binding domain                                                      | 52518~52467~52518                   | TPP_enzyme_N~TPP_enzyme_M~TPP_enzyme_C       |
| 52490 | Tubulin nucleotide-binding domain-like                                               | 52490~55307                         | Tubulin~Tubulin_C                            |
| 52499 | Isochorismatase-like hydrolases                                                      | 52499                               | Isochorismatase                              |
| 52507 | Homo-oligomeric flavin-containing Cys decarboxylases, HFCD                           | 52507~102645                        | Flavoprotein                                 |
| 52518 | Thiamin diphosphate-binding fold (THDP-binding)                                      | 52518~52467~52518                   | TPP_enzyme_N~TPP_enzyme_M~TPP_enzyme_C       |
| 52540 | P-loop containing nucleoside triphosphate hydrolases                                 | 52540                               | ABC_tran                                     |
| 52728 | PTS IIB component                                                                    | 52728                               | PTSIIIB_sorb                                 |
| 52733 | Nicotinate mononucleotide:5,6-dimethylbenzimidazole phosphoribosyltransferase (CobT) | 52733                               | DBI_PRT                                      |
| 52738 | Methylesterase CheB, C-terminal domain                                               | 52172~52738                         | Response_reg~CheB_methylest                  |
| 52743 | Subtilisin-like                                                                      | 52743                               | Peptidase_S8                                 |
| 52768 | Arginase/deacetylase                                                                 | 52768                               | Arginase                                     |
| 52777 | CoA-dependent acyltransferases                                                       | 51230~47005~52777                   | Biotin_lipoyl~E3_binding~2-oxoacid_dh        |
| 52788 | Phosphotyrosine protein phosphatases I                                               | 52788                               | LMWPc                                        |
| 52794 | PTS system IIB component-like                                                        | 52794                               | PTS_IIB                                      |
| 52799 | (Phosphotyrosine protein) phosphatases II                                            | 52799                               | DSPc                                         |
| 52821 | Rhodanese/Cell cycle control phosphatase                                             | 52821                               | Rhodanese                                    |
| 52833 | Thioredoxin-like                                                                     | 52833~47616                         | Thioredoxin                                  |

|       |                                                               |                               |                                                      |
|-------|---------------------------------------------------------------|-------------------------------|------------------------------------------------------|
| 52913 | RNA 3'-terminal phosphate cyclase, RPTC, insert domain        | 52913                         | RTC                                                  |
| 52922 | TK C-terminal domain-like                                     | 52518~52922                   | Transket_pyr~Transketolase_C                         |
| 52935 | PK C-terminal domain-like                                     | 50800~52935                   | PK~PK_C                                              |
| 52943 | ATP synthase (F1-ATPase), gamma subunit                       | 52943                         | ATP-synt                                             |
| 52949 | Macro domain-like                                             | 52949                         | Macro                                                |
| 52954 | Class II aaRS ABD-related                                     | 55681~52954                   | tRNA-synt_His~HGTP_anticodon                         |
| 52964 | TolB, N-terminal domain                                       | 52964~50960                   | TolB_N~PD40~PD40~PD40                                |
| 52968 | B12-dependent dehydratase associated subunit                  | 52968                         | Dehydratase_MU                                       |
| 52972 | ITPase-like                                                   | 52972                         | Ham1p_like                                           |
| 52980 | Restriction endonuclease-like                                 | 52980                         | UvrD-helicase~UvrD_C                                 |
| 53032 | tRNA-intron endonuclease catalytic domain-like                | 53032                         | tRNA_int_endo                                        |
| 53036 | Eukaryotic RPB5 N-terminal domain                             | 53036~55287                   | RNA_pol_Rpb5_N~RNA_pol_Rpb5_C                        |
| 53041 | Resolvase-like                                                | 53041                         | Resolvase~HTH_7                                      |
| 53056 | beta-carbonic anhydrase, cab                                  | 53056                         | Pro_CA                                               |
| 53062 | PTS system fructose IIA component-like                        | 53062                         | EIIA-man                                             |
| 53067 | Actin-like ATPase domain                                      | 53067~53067                   | ROK                                                  |
| 53092 | Creatinase/prolidase N-terminal domain                        | 53092~55920                   | Creatinase_N~Peptidase_M24                           |
| 53098 | Ribonuclease H-like                                           | 53098                         | RNase_T                                              |
| 53137 | Translational machinery components                            | 53137                         | Ribosomal_L18p                                       |
| 53146 | Nitrogenase accessory factor-like                             | 53146                         | Nitro_FeMo-Co                                        |
| 53150 | DNA repair protein MutS, domain II                            | 55271~53150~48334~52540       | MutS_I~MutS_II~MutS_III~MutS_V                       |
| 53155 | Methylated DNA-protein cysteine methyltransferase domain      | 57884~53155~46767             | Ada_Zn_binding~HTH_18~Methyltr ansf_1N~DNA_binding_1 |
| 53163 | HybD-like                                                     | 53163                         | HycI                                                 |
| 53167 | Purine and uridine phosphorylases                             | 53167                         | PNP_UDP_1                                            |
| 53178 | Peptidyl-tRNA hydrolase-like                                  | 53178                         | Pept_tRNA_hydro                                      |
| 53182 | Pyrrolidone carboxyl peptidase (pyroglutamate aminopeptidase) | 53182                         | Peptidase_C15                                        |
| 53187 | Zn-dependent exopeptidases                                    | 53187                         | Peptidase_M20                                        |
| 53213 | LigB-like                                                     | 53213                         | LigB                                                 |
| 53218 | Molybdenum cofactor biosynthesis proteins                     | 53218                         | MoCF_biosynth                                        |
| 53223 | Aminoacid dehydrogenase-like, N-terminal domain               | 53223~51735                   | ELFV_dehydrog_N~ELFV_dehydrog                        |
| 53244 | MurD-like peptide ligases, peptide-binding domain             | 51984~53623~53244             | Mur_ligase~Mur_ligase_M~Mur_ligase_C                 |
| 53254 | Phosphoglycerate mutase-like                                  | 53254                         | His_Phos_1                                           |
| 53271 | PRTase-like                                                   | 53271                         | Pribosyltran                                         |
| 53300 | vWA-like                                                      | 53300                         | VWA_2                                                |
| 53323 | Pyruvate-ferredoxin oxidoreductase, PFOR, domain III          | 52518~52922~53323~54862~52518 | POR_N~POR~EKR~Fer4_6~Fer4_7                          |
| 53328 | Formyltransferase                                             | 53328~50486                   | Formyl_trans_N~Formyl_trans_C                        |
| 53335 | S-adenosyl-L-methionine-dependent methyltransferases          | 53335                         | Methyltransf_31                                      |
| 53383 | PLP-dependent transferases                                    | 53383                         | Aminotran_1_2                                        |
| 53448 | Nucleotide-diphospho-sugar transferases                       | 53448                         | NTP_transferase                                      |

|       |                                                             |                         |                                             |
|-------|-------------------------------------------------------------|-------------------------|---------------------------------------------|
| 53474 | alpha/beta-Hydrolases                                       | 53474                   | Abhydrolase_1                               |
| 53590 | Nucleoside hydrolase                                        | 53590                   | IU_nuc_hydro                                |
| 53597 | Dihydrofolate reductase-like                                | 53597                   | DHFR_1                                      |
| 53613 | Ribokinase-like                                             | 53613                   | PfkB                                        |
| 53623 | MurD-like peptide ligases, catalytic domain                 | 51984~53623~53244       | Mur_ligase~Mur_ligase_M~Mur_ligase_C        |
| 53633 | Carbamate kinase-like                                       | 53633                   | AA_kinase                                   |
| 53639 | AraD/HMP-PK domain-like                                     | 53639                   | Aldolase_II                                 |
| 53649 | Alkaline phosphatase-like                                   | 53649                   | Sulfatase                                   |
| 53659 | Isocitrate/Isopropylmalate dehydrogenase-like               | 53659                   | Iso_dh                                      |
| 53671 | Aspartate/ornithine carbamoyltransferase                    | 53671~53671             | OTCace_N~OTCace                             |
| 53681 | Aspartate/glutamate racemase                                | 53681~53681             | Asp_Glu_race                                |
| 53686 | Tryptophan synthase beta subunit-like PLP-dependent enzymes | 53686                   | PALP                                        |
| 53697 | SIS domain                                                  | 53697                   | SIS_2                                       |
| 53706 | Formate dehydrogenase/DMSO reductase, domains 1-3           | 53706~50692             | Molybdopterin~Molybdop_binding              |
| 53720 | ALDH-like                                                   | 53720                   | Aldedh                                      |
| 53732 | Aconitase iron-sulfur domain                                | 53732~52016             | Aconitase~Aconitase_C                       |
| 53738 | Phosphoglucomutase, first 3 domains                         | 53738~53738~53738~55957 | PGM_PMM_I~PGM_PMM_II~PGM_PMM_III~PGM_PMM_IV |
| 53743 | FucI/AraA N-terminal and middle domains                     | 53743~50443             | Arabinose_Isome~Arabinose_Iso_C             |
| 53748 | Phosphoglycerate kinase                                     | 53748                   | PGK                                         |
| 53756 | UDP-Glycosyltransferase/glycogen phosphorylase              | 53756                   | Glyco_transf_5~Glycos_transf_1              |
| 53774 | Glutaminase/Asparaginase                                    | 53774                   | Asparaginase                                |
| 53784 | Phosphofructokinase                                         | 53784                   | PFK                                         |
| 53790 | Tetrapyrrole methylase                                      | 53790                   | TP_methylase                                |
| 53795 | PEP carboxykinase-like                                      | 68923~53795             | PEPCK                                       |
| 53800 | Chelatase                                                   | 53800                   | Ferrochelatase                              |
| 53807 | Helical backbone metal receptor                             | 53807                   | Peripla_BP_2                                |
| 53822 | Periplasmic binding protein-like I                          | 53822                   | Peripla_BP_4                                |
| 53850 | Periplasmic binding protein-like II                         | 53850                   | HTH_1~LysR_substrate                        |
| 53901 | Thiolase-like                                               | 53901~53901             | Thiolase_N~Thiolase_C                       |
| 53920 | Fe-only hydrogenase                                         | 54292~54862~53920       | Fe_hyd_lg_C~Fe_hyd_Ssu                      |
| 53927 | Cytidine deaminase-like                                     | 53927                   | dCMP_cyt_deam_1                             |
| 53933 | Microbial ribonucleases                                     | 53933                   | Ribonuclease                                |
| 53955 | Lysozyme-like                                               | 53955                   | Phage_lysozyme                              |
| 54001 | Cysteine proteinases                                        | 54001                   | UCH                                         |
| 54060 | His-Me finger endonucleases                                 | 54060                   | Endonuclease_NS                             |
| 54076 | RNase A-like                                                | 54076                   | RnaseA                                      |
| 54098 | Prion-like                                                  | 54098                   | Prion_bPrPp~Prion                           |
| 54106 | LysM domain                                                 | 54106                   | SLT~LysM~LysM                               |
| 54111 | Urease, gamma-subunit                                       | 54111                   | Urease_gamma                                |
| 54117 | Interleukin 8-like chemokines                               | 54117                   | IL8                                         |
| 54160 | Chromo domain-like                                          | 54160                   | Chromo                                      |
| 54171 | DNA-binding domain                                          | 54171                   | AP2                                         |
| 54184 | Penicillin-binding protein 2x (pbp-2x), c-terminal domain   | 56601~54184~54184       | PBP_dimer~Transpeptidase~PASTA              |
| 54189 | Ribosomal proteins S24e, L23 and L15e                       | 54189                   | Ribosomal_L23                               |

|       |                                                                       |                         |                                               |
|-------|-----------------------------------------------------------------------|-------------------------|-----------------------------------------------|
| 54197 | HIT-like                                                              | 54197                   | HIT                                           |
| 54211 | Ribosomal protein S5 domain 2-like                                    | 54211                   | HATPase_c~DNA_gyraseB~Toprim~DNA_gyraseB_C    |
| 54236 | Ubiquitin-like                                                        | 54236                   | ubiquitin                                     |
| 54277 | CAD & PB1 domains                                                     | 54277                   | PB1~Pkinase                                   |
| 54285 | MoaD/ThiS                                                             | 54285                   | ThiS                                          |
| 54292 | 2Fe-2S ferredoxin-like                                                | 54292                   | Fer2                                          |
| 54328 | Staphylokinase/streptokinase                                          | 54328                   | Staphylokinase                                |
| 54334 | Superantigen toxins, C-terminal domain                                | 50203~54334             | SSL_OB                                        |
| 54358 | Immunoglobulin-binding domains                                        | 54358                   | IgG_binding_B                                 |
| 54364 | Translation initiation factor IF3, N-terminal domain                  | 54364~55200             | IF3_N~IF3_C                                   |
| 54368 | Glutamine synthetase, N-terminal domain                               | 54368~55931             | Gln-synt_N~Gln-synt_C                         |
| 54373 | FAD-linked reductases, C-terminal domain                              | 54373                   | DAO                                           |
| 54403 | Cystatin/monellin                                                     | 54403                   | Cystatin                                      |
| 54416 | Amine oxidase N-terminal region                                       | 54416~49998             | Cu_amine_oxidN2~Cu_amine_oxidN3~Cu_amine_oxid |
| 54423 | DsbC/DsbG N-terminal domain-like                                      | 54423~52833             | DsbC_N~Thioredoxin_2                          |
| 54427 | NTF2-like                                                             | 54427                   | SnoaL_2                                       |
| 54441 | Uracil-DNA glycosylase inhibitor protein                              | 54441                   |                                               |
| 54447 | ssDNA-binding transcriptional regulator domain                        | 54447                   | PC4                                           |
| 54452 | MHC antigen-recognition domain                                        | 54452~48726             | MHC_I                                         |
| 54495 | UBC-like                                                              | 54495                   | UQ_con                                        |
| 54506 | Diaminopimelate epimerase-like                                        | 54506                   | PhzC-PhzF                                     |
| 54511 | GFP-like                                                              | 54511                   | GFP                                           |
| 54518 | Tubby C-terminal domain-like                                          | 54518                   | Tub                                           |
| 54523 | Pili subunits                                                         | 54523                   | N_methyl_2~T2SSG                              |
| 54529 | Mitochondrial glycoprotein MAM33-like                                 | 54529                   | MAM33                                         |
| 54534 | FKBP-like                                                             | 54534                   | FKBP_C                                        |
| 54552 | Colicin E3 immunity protein                                           | 54552                   | Cloacin_immun                                 |
| 54556 | Chitinase insertion domain                                            | 51445~54556             | Glyco_hydro_18                                |
| 54565 | Ribosomal protein S16                                                 | 54565                   | Ribosomal_S16                                 |
| 54570 | Ribosomal protein S19                                                 | 54570                   | Ribosomal_S19                                 |
| 54575 | Ribosomal protein L31e                                                | 54575                   | Ribosomal_L31e                                |
| 54580 | Allophycocyanin linker chain (domain)                                 | 54580                   | CpcD                                          |
| 54585 | Cdc48 domain 2-like                                                   | 50692~54585~52540~52540 | CDC48_N~CDC48_2~AAA~AAA                       |
| 54593 | Glyoxalase/Bleomycin resistance protein/Dihydroxybiphenyl dioxygenase | 54593                   | Glyoxalase                                    |
| 54611 | SecB-like                                                             | 54611                   | SecB                                          |
| 54616 | DNA-binding domain of Mlu1-box binding protein MBP1                   | 54616                   | Ank_4                                         |
| 54621 | Heme-binding protein A (HasA)                                         | 54621                   | HasA                                          |
| 54626 | Chalcone isomerase                                                    | 54626                   | Chalcone                                      |
| 54631 | CBS-domain pair                                                       | 54631                   | CBS~CBS                                       |
| 54637 | Thioesterase/thiol ester dehydrase-isomerase                          | 54637                   | 4HBT                                          |

|       |                                                                             |                               |                                          |
|-------|-----------------------------------------------------------------------------|-------------------------------|------------------------------------------|
| 54648 | DLC                                                                         | 54648                         | Dynein_light                             |
| 54654 | CI-2 family of serine protease inhibitors                                   | 54654                         | potato_inhibit                           |
| 54665 | CO dehydrogenase molybdoprotein N-domain-like                               | 54665~56003                   | Ald_Xan_dh_C~Ald_Xan_dh_C2               |
| 54675 | Nicotinate/Quinolinate PRTase N-terminal domain-like                        | 54675~51690                   | NAPRTase                                 |
| 54680 | Pyrimidine nucleoside phosphorylase C-terminal domain                       | 47648~52418~54680             | Glycos_trans_3N~Glycos_transf_3~PYNP_C   |
| 54686 | Ribosomal protein L16p/L10e                                                 | 54686                         | Ribosomal_L16                            |
| 54690 | Molybdopterin synthase subunit MoaE                                         | 54690                         | MoaE                                     |
| 54695 | POZ domain                                                                  | 54695~81324                   | BTB_2~Ion_trans                          |
| 54713 | Elongation factor Ts (EF-Ts), dimerisation domain                           | 46934~54713~54713             | EF_TS                                    |
| 54719 | Fe,Mn superoxide dismutase (SOD), C-terminal domain                         | 46609~54719                   | Sod_Fe_N~Sod_Fe_C                        |
| 54736 | ClpS-like                                                                   | 54736                         | Ribosomal_L12_N~Ribosomal_L12            |
| 54747 | Ribosomal L11/L12e N-terminal domain                                        | 54747~46906                   | Ribosomal_L11_N~Ribosomal_L11            |
| 54752 | RecA protein, C-terminal domain                                             | 52540~54752                   | RecA                                     |
| 54762 | Signal recognition particle alu RNA binding heterodimer, SRP9/14            | 54762                         | SRP14                                    |
| 54768 | dsRNA-binding domain-like                                                   | 69065~54768                   | Ribonucleas_3_3~dsrm                     |
| 54782 | Porphobilinogen deaminase (hydroxymethylbilane synthase), C-terminal domain | 53850~54782                   | Porphobil_deam~Porphobil_deamC           |
| 54786 | YcfA/nrd intein domain                                                      | 54786                         | HicA_toxin                               |
| 54791 | Eukaryotic type KH-domain (KH-domain type I)                                | 54791                         | KH_1~KH_1~KH_1                           |
| 54806 | Alpha-lytic protease prodomain                                              | 54806~50494                   | Pro_Al_protease                          |
| 54810 | GMP synthetase C-terminal dimerisation domain                               | 52317~52402~54810             | GATase~GMP_synt_C                        |
| 54814 | Prokaryotic type KH domain (KH-domain type II)                              | 52540~54814                   | MMR_HSR1~KH_2                            |
| 54821 | Ribosomal protein S3 C-terminal domain                                      | 54814~54821                   | KH_2~Ribosomal_S3_C                      |
| 54826 | Enolase N-terminal domain-like                                              | 54826~51604                   | MR_MLE_N~MR_MLE_C                        |
| 54843 | Ribosomal protein L22                                                       | 54843                         | Ribosomal_L22                            |
| 54849 | GroEL-intermediate domain like                                              | 54849~52029                   | Cpn60_TCP1                               |
| 54857 | DNA damage-inducible protein DinI                                           | 54857                         | DinI                                     |
| 54862 | 4Fe-4S ferredoxins                                                          | 54862                         | ETF_QO                                   |
| 54893 | Aspartate carbamoyltransferase, Regulatory-chain, N-terminal domain         | 54893~57825                   | PyrI~PyrI_C                              |
| 54897 | Protease propeptides/inhibitors                                             | 54897~53187                   | Propep_M14~Peptidase_M14                 |
| 54909 | Dimeric alpha+beta barrel                                                   | 54909                         | ABM                                      |
| 54913 | GlnB-like                                                                   | 54913                         | P-II                                     |
| 54919 | Nucleoside diphosphate kinase, NDK                                          | 54919                         | NDK                                      |
| 54928 | RNA-binding domain, RBD                                                     | 54928                         | RRM_1                                    |
| 54957 | Viral DNA-binding domain                                                    | 51332~54957                   | PPV_E2_N~PPV_E2_C                        |
| 54966 | RuBisCO, large subunit, small (N-terminal) domain                           | 54966~51649                   | RuBisCO_large_N~RuBisCO_large            |
| 54975 | Acylphosphatase/BLUF domain-like                                            | 54975                         | Acylphosphatase                          |
| 54980 | EF-G C-terminal domain-like                                                 | 52540~50447~54980~54211~54980 | GTP_EFTU~GTP_EFTU_D2~EFG_II~EFG_IV~EFG_C |
| 54984 | eEF-1beta-like                                                              | 54984                         | EF-1_beta_acid~EF1_GNE                   |



|       |                                                                     |                               |                                              |
|-------|---------------------------------------------------------------------|-------------------------------|----------------------------------------------|
| 54991 | Anticodon-binding domain of PheRS                                   | 50249~56037~46955~55681~54991 | tRNA_bind~B3_4~B5~FDX-ACB                    |
| 54995 | Ribosomal protein S6                                                | 54995                         | Ribosomal_S6                                 |
| 54999 | Ribosomal protein S10                                               | 54999                         | Ribosomal_S10                                |
| 55003 | PAP/Archaeal CCA-adding enzyme, C-terminal domain                   | 81301~81631~55003             | PAP_central                                  |
| 55008 | HMA, heavy metal-associated domain                                  | 55008                         | HMA~HMA~E1-E2_ATPase~Hydrolase               |
| 55021 | ACT-like                                                            | 55021~55021                   | ABC_tran~NIL                                 |
| 55031 | Bacterial exopeptidase dimerisation domain                          | 55031                         | Peptidase_M20                                |
| 55035 | NAD-binding domain of HMG-CoA reductase                             | 55035                         | HMG-CoA_red                                  |
| 55040 | Molybdenum cofactor biosynthesis protein C, MoaC                    | 55040                         | MoaC                                         |
| 55044 | TRADD, N-terminal domain                                            | 55044                         | TRADD_N~Death                                |
| 55048 | Probable ACP-binding domain of malonyl-CoA ACP transacylase         | 55048                         | Acyl_transf_1                                |
| 55052 | CheY-binding domain of CheA                                         | 47226~55052~47384~55874~50341 | Hpt~CheY-binding~H-kinase_dim~HATPase_c~CheW |
| 55056 | Killer toxin KP6 alpha-subunit                                      | 55056                         |                                              |
| 55060 | GHMP Kinase, C-terminal domain                                      | 54211~55060                   | GHMP_kinases_N~GHMP_kinases_C                |
| 55064 | Translational regulator protein regA                                | 55064                         | Translat_reg                                 |
| 55068 | Peptide methionine sulfoxide reductase                              | 55068                         | PMSR                                         |
| 55073 | Nucleotide cyclase                                                  | 55073                         | Guanylate_cyc                                |
| 55083 | 6-hydroxymethyl-7,8-dihydropterin pyrophosphokinase, HPPK           | 55083                         | HPPK                                         |
| 55088 | Methyl-coenzyme M reductase subunits                                | 55088~48081                   | MCR_alpha_N~MCR_alpha                        |
| 55103 | FAD-linked oxidases, C-terminal domain                              | 56176~55103                   | FAD_binding_4~Lact-deh-memb                  |
| 55112 | Formylmethanofuran:tetrahydromethanopterin formyltransferase        | 55112~55112                   | FTR~FTR_C                                    |
| 55116 | Formiminotransferase domain of formiminotransferase-cyclodeaminase. | 55116~55116                   | FTCD_N~FTCD                                  |
| 55120 | Pseudouridine synthase                                              | 55120                         | S4~PseudoU_synth_2                           |
| 55124 | Nitrite/Sulfite reductase N-terminal domain-like                    | 55124~56014~55124~56014       | NIR_SIR_ferr~NIR_SIR~NIR_SIR_ferr~NIR_SIR    |
| 55129 | Ribosomal protein L30p/L7e                                          | 55129                         | Ribosomal_L30                                |
| 55136 | Probable bacterial effector-binding domain                          | 55136                         | HTH_18~GyrI-like                             |
| 55144 | LigT-like                                                           | 55144                         | 2_5_RNA_ligase2                              |
| 55149 | Pepsin inhibitor-3                                                  | 55149                         | Pepsin-I3                                    |
| 55154 | CYTH-like phosphatases                                              | 55154                         | CYTH                                         |
| 55159 | eIF1-like                                                           | 55159                         | SUI1                                         |
| 55166 | Hedgehog/DD-peptidase                                               | 55166                         | Peptidase_M74                                |
| 55174 | Alpha-L RNA-binding motif                                           | 55174                         | Ribosomal_S4~S4                              |
| 55186 | ThrRS/AlaRS common domain                                           | 55681~101353~55186            | tRNA-synt_2c~tRNA_SAD~DHHA1                  |
| 55190 | Arginyl-tRNA synthetase (ArgRS), N-terminal 'additional' domain     | 55190~52374~47323             | Arg_tRNA_synt_N~tRNA-synt_1d~DALR_1          |
| 55194 | Ribosome recycling factor, RRF                                      | 55194                         | RRF                                          |
| 55200 | Translation initiation factor IF3, C-terminal domain                | 54364~55200                   | IF3_N~IF3_C                                  |

|       |                                                                              |                         |                                                               |
|-------|------------------------------------------------------------------------------|-------------------------|---------------------------------------------------------------|
| 55205 | EPT/RTPC-like                                                                | 55205                   | EPSP_synthase                                                 |
| 55221 | Yeast killer toxins                                                          | 55221                   | Kp4                                                           |
| 55229 | Cell division protein MinE topological specificity domain                    | 55229                   | MinE                                                          |
| 55234 | Cyanase C-terminal domain                                                    | 47413~55234             | Cyanate_lyase                                                 |
| 55239 | RuBisCO, small subunit                                                       | 55239                   | RuBisCO_small                                                 |
| 55248 | PCD-like                                                                     | 55248                   | Pterin_4a                                                     |
| 55252 | C-terminal domain of arginine repressor                                      | 46785~55252             | Arg_repressor~Arg_repressor_C                                 |
| 55257 | RBP11-like subunits of RNA polymerase                                        | 55257                   | RNA_pol_L_2                                                   |
| 55261 | GAD domain-like                                                              | 50249~55681~55261~55681 | tRNA_anti-codon~tRNA-synt_2                                   |
| 55267 | tRNA-intron endonuclease N-terminal domain-like                              | 55267~53032             | tRNA_int_endo_N~tRNA_int_endo                                 |
| 55271 | DNA repair protein MutS, domain I                                            | 55271~53150~48334~52540 | MutS_I~MutS_II~MutS_III~MutS_V                                |
| 55277 | GYF domain                                                                   | 55277                   | GYF                                                           |
| 55282 | RL5-like                                                                     | 55282                   | Ribosomal_L5~Ribosomal_L5_C                                   |
| 55287 | RPB5-like RNA polymerase subunit                                             | 53036~55287             | RNA_pol_Rpb5_N~RNA_pol_Rpb5_C                                 |
| 55298 | YjgF-like                                                                    | 55298                   | Ribonuc_L-PSP                                                 |
| 55307 | Tubulin C-terminal domain-like                                               | 52490~55307             | Tubulin~Tubulin_C                                             |
| 55315 | L30e-like                                                                    | 55315                   | Ribosomal_L7Ae                                                |
| 55326 | PurM N-terminal domain-like                                                  | 55326~56042             | AIRS~AIRS_C                                                   |
| 55331 | Tautomerase/MIF                                                              | 55331                   | Tautomerase                                                   |
| 55347 | Glyceraldehyde-3-phosphate dehydrogenase-like, C-terminal domain             | 51735~55347             | Semialdhyde_dh~Semialdhyde_dhC                                |
| 55383 | Copper amine oxidase, domain N                                               | 55383~54416~54416~49998 | Cu_amine_oxidN1~Cu_amine_oxidN2~Cu_amine_oxidN3~Cu_amine_oxid |
| 55387 | Frataxin/Nqo15-like                                                          | 55387                   | Frataxin_Cyay                                                 |
| 55394 | Bactericidal permeability-increasing protein, BPI                            | 55394                   | LBP_BPI_CETP~LBP_BPI_CETP_C                                   |
| 55399 | Subtilisin inhibitor                                                         | 55399                   | SSI                                                           |
| 55405 | RNA bacteriophage capsid protein                                             | 55405                   | Levi_coat                                                     |
| 55418 | eIF4e-like                                                                   | 55418                   | IF4E                                                          |
| 55424 | FAD/NAD-linked reductases, dimerisation (C-terminal) domain                  | 51905~55424             | Pyr_redox_2~Pyr_redox_dim                                     |
| 55447 | CO dehydrogenase flavoprotein C-terminal domain-like                         | 56176~55447             | FAD_binding_5~CO_deh_flav_C                                   |
| 55455 | SRF-like                                                                     | 55455                   | SRF-TF~K-box                                                  |
| 55464 | Origin of replication-binding domain, RBD-like                               | 55464                   | Gemini_AL1~Gemini_AL1_M                                       |
| 55469 | FMN-dependent nitroreductase-like                                            | 55469                   | Nitroreductase                                                |
| 55481 | N-terminal domain of eukaryotic peptide chain release factor subunit 1, ERF1 | 55481~53137~55315       | eRF1_1~eRF1_2~eRF1_3                                          |
| 55486 | Metalloproteases ("zincins"), catalytic domain                               | 55486                   | Peptidase_M3                                                  |
| 55545 | beta-N-acetylhexosaminidase-like domain                                      | 55545~51445             | Glyco_hydro_20b~Glyco_hydro_20                                |
| 55550 | SH2 domain                                                                   | 55550                   | SH2                                                           |
| 55594 | HPr-like                                                                     | 55594                   | PTS-HPr                                                       |
| 55604 | Glucose permease domain IIB                                                  | 55604~51261             | PTS_EIIC~PTS_EIIB                                             |

|       |                                                                        |                         |                                                 |
|-------|------------------------------------------------------------------------|-------------------------|-------------------------------------------------|
| 55608 | Homing endonucleases                                                   | 55608                   | LAGLIDADG_1~LAGLIDADG_1                         |
| 55620 | Tetrahydrobiopterin biosynthesis enzymes-like                          | 55620                   | GTP_cyclohydroI                                 |
| 55637 | Cell cycle regulatory proteins                                         | 55637                   | CKS                                             |
| 55648 | beta-lactamase-inhibitor protein, BLIP                                 | 55648                   | BLIP                                            |
| 55653 | Ribosomal protein L9 C-domain                                          | 55658~55653             | Ribosomal_L9_N~Ribosomal_L9_C                   |
| 55658 | L9 N-domain-like                                                       | 55658~55653             | Ribosomal_L9_N~Ribosomal_L9_C                   |
| 55666 | Ribonuclease PH domain 2-like                                          | 54211~55666             | RNase_PH~RNase_PH_C                             |
| 55671 | Regulatory factor Nef                                                  | 55671                   | F-protein                                       |
| 55676 | CytB endotoxin-like                                                    | 55676                   | Bac_thur_toxin                                  |
| 55681 | Class II aaRS and biotin synthetases                                   | 55681                   | tRNA_anti-codon~tRNA-synt_2                     |
| 55711 | Subdomain of clathrin and coatomer appendage domain                    | 48371~49348~55711       | Adaptin_N~Alpha_adaptinC2~Alpha_adaptin_C       |
| 55718 | SCP-like                                                               | 55718                   | SCP2                                            |
| 55724 | Mog1p/PsbP-like                                                        | 55724                   | DUF1795                                         |
| 55729 | Acyl-CoA N-acyltransferases (Nat)                                      | 55729                   | Acetyltransf_1                                  |
| 55753 | Actin depolymerizing proteins                                          | 55753                   | Cofilin_ADF                                     |
| 55770 | Profilin (actin-binding protein)                                       | 55770                   | Profilin                                        |
| 55781 | GAF domain-like                                                        | 55781                   | HTH_IclR~IclR                                   |
| 55785 | PYP-like sensor domain (PAS domain)                                    | 55785                   | PAS_9~GGDEF~EAL                                 |
| 55797 | PR-1-like                                                              | 55797                   | CAP                                             |
| 55804 | Phosphotransferase/anion transport protein                             | 55804                   | PTS_EIIA_2                                      |
| 55811 | Nudix                                                                  | 55811                   | NUDIX                                           |
| 55816 | 5'-nucleotidase (syn. UDP-sugar hydrolase), C-terminal domain          | 56300~55816             | Metallophos~5_nucleotid_C                       |
| 55821 | YrdC/RibB                                                              | 55821                   | Sua5_yciO_yrdC                                  |
| 55826 | YbaK/ProRS associated domain                                           | 55826                   | tRNA_edit                                       |
| 55831 | Thymidylate synthase/dCMP hydroxymethylase                             | 55831                   | Thymidylat_synt                                 |
| 55846 | N-acetylmuramoyl-L-alanine amidase-like                                | 55846                   | Amidase_2                                       |
| 55856 | Cytochrome b5-like heme/steroid binding domain                         | 55856                   | Cyt-b5                                          |
| 55869 | DNA topoisomerase I domain                                             | 55869~56349             | VirDNA-topo-I_N~Topoisom_I                      |
| 55874 | ATPase domain of HSP90 chaperone/DNA topoisomerase II/histidine kinase | 55874~54211             | HATPase_c~DNA_gyraseB~Toprim~DNA_gyraseB_C      |
| 55890 | Sporulation response regulatory protein Spo0B                          | 55890                   | SPOB_a~SPOB_ab                                  |
| 55895 | Ribonuclease Rh-like                                                   | 55895                   | Ribonuclease_T2                                 |
| 55904 | Ornithine decarboxylase C-terminal domain                              | 53383~55904             | OKR_DC_1_N~OKR_DC_1~OKR_DC_1_C                  |
| 55909 | Pentain                                                                | 55909                   | Amidinotransf                                   |
| 55920 | Creatinase/aminopeptidase                                              | 55920                   | Peptidase_M24                                   |
| 55931 | Glutamine synthetase/guanido kinase                                    | 55931                   | GatB_N~GatB_Yqey                                |
| 55945 | TATA-box binding protein-like                                          | 55945~55945             | TBP~TBP                                         |
| 55957 | Phosphoglucomutase, C-terminal domain                                  | 53738~53738~53738~55957 | PGM_PMM_I~PGM_PMM_II~PGM_PMM_III~PGM_PMM_IV     |
| 55961 | Bet v1-like                                                            | 55961                   | AHSA1                                           |
| 55973 | S-adenosylmethionine synthetase                                        | 55973~55973~55973       | S-AdoMet_synt_N~S-AdoMet_synt_M~S-AdoMet_synt_C |

|       |                                                                                     |                               |                                               |
|-------|-------------------------------------------------------------------------------------|-------------------------------|-----------------------------------------------|
| 55979 | DNA clamp                                                                           | 55979~55979~55979             | DNA_pol3_beta~DNA_pol3_beta_2~DNA_pol3_beta_3 |
| 56003 | Molybdenum cofactor-binding domain                                                  | 54665~56003                   | Ald_Xan_dh_C~Ald_Xan_dh_C2                    |
| 56014 | Nitrite and sulphite reductase 4Fe-4S domain-like                                   | 55124~56014~55124~56014       | NIR_SIR_ferr~NIR_SIR~NIR_SIR_ferr~NIR_SIR     |
| 56019 | The spindle assembly checkpoint protein mad2                                        | 56019                         | HORMA                                         |
| 56024 | Phospholipase D/nuclease                                                            | 56024                         | PP_kinase_N~PP_kinase~PP_kinase_C             |
| 56029 | Monoxygenase (hydroxylase) regulatory protein                                       | 56029                         | MmoB_DmpM                                     |
| 56037 | PheT/TilS domain                                                                    | 50249~56037~46955~55681~54991 | tRNA_bind~B3_4~B5~FDX-ACB                     |
| 56042 | PurM C-terminal domain-like                                                         | 55326~56042                   | AIRS~AIRS_C                                   |
| 56047 | Ribosomal protein S8                                                                | 56047                         | Ribosomal_S8                                  |
| 56053 | Ribosomal protein L6                                                                | 56053~56053                   | Ribosomal_L6~Ribosomal_L6                     |
| 56059 | Glutathione synthetase ATP-binding domain-like                                      | 52440~56059~51246             | CPSase_L_D2~CPSase_L_D3~CPSase_L_D2~MGS       |
| 56091 | DNA ligase/mRNA capping enzyme, catalytic domain                                    | 56091~50249~47781~52113       | DNA_ligase_A_M~DNA_ligase_A_C                 |
| 56104 | SAICAR synthase-like                                                                | 56104                         | SAICAR_synt                                   |
| 56112 | Protein kinase-like (PK-like)                                                       | 56112                         | Pkinase                                       |
| 56176 | FAD-binding/transporter-associated domain-like                                      | 56176                         | FAD_binding_4~MurB_C                          |
| 56194 | Uridine diphospho-N-Acetylenolpyruvylglucosamine reductase, MurB, C-terminal domain | 56176~56194                   | FAD_binding_4~MurB_C                          |
| 56199 | Methenyltetrahydromethanopterin cyclohydrolase                                      | 56199                         | MCH                                           |
| 56204 | Hect, E3 ligase catalytic domain                                                    | 56204                         | C2~WW~WW~WW~HECT                              |
| 56209 | Nitrile hydratase alpha chain                                                       | 56209                         | NHase_alpha                                   |
| 56214 | 4'-phosphopantetheinyl transferase                                                  | 56214                         | ACPS                                          |
| 56219 | DNase I-like                                                                        | 56219                         | Exo_endo_phos                                 |
| 56228 | Aldehyde ferredoxin oxidoreductase, N-terminal domain                               | 56228~48310                   | AFOR_N~AFOR_C                                 |
| 56235 | N-terminal nucleophile aminohydrolases (Ntn hydrolases)                             | 56235                         | Proteasome                                    |
| 56266 | DmpA/ArgJ-like                                                                      | 56266                         | ArgJ                                          |
| 56271 | Pyruvoyl-dependent histidine and arginine decarboxylases                            | 56271                         | PvlArgDC                                      |
| 56276 | S-adenosylmethionine decarboxylase                                                  | 56276                         | AdoMet_dc                                     |
| 56281 | Metallo-hydrolase/oxidoreductase                                                    | 56281                         | Lactamase_B                                   |
| 56300 | Metallo-dependent phosphatases                                                      | 56300                         | Metallophos                                   |
| 56317 | Carbon-nitrogen hydrolase                                                           | 56317                         | CN_hydrolase                                  |
| 56322 | ADC synthase                                                                        | 56322                         | Anth_synt_I_N~Chorismate_bind                 |
| 56327 | LDH C-terminal domain-like                                                          | 51735~56327                   | Ldh_1_N~Ldh_1_C                               |
| 56349 | DNA breaking-rejoining enzymes                                                      | 56349                         | Phage_int_SAM_1~Phage_integrase               |
| 56366 | SMAD MH1 domain                                                                     | 56366~49879                   | MH1~MH2                                       |
| 56371 | Ribosome inactivating proteins (RIP)                                                | 56371                         | RIP                                           |
| 56399 | ADP-ribosylation                                                                    | 56399                         | PTS_2-RNA                                     |
| 56420 | Peptide deformylase                                                                 | 56420                         | Pep_deformylase                               |
| 56425 | Succinate dehydrogenase/fumarate reductase flavoprotein, catalytic domain           | 51905~56425~46977             | FAD_binding_2~Succ_DH_flav_C                  |
| 56436 | C-type lectin-like                                                                  | 56436                         | Lectin_C                                      |

|       |                                                                          |                               |                                                                                     |
|-------|--------------------------------------------------------------------------|-------------------------------|-------------------------------------------------------------------------------------|
| 56487 | SRCR-like                                                                | 56487                         | SRCR~SRCR~SRCR~SRCR~Lysyl_oxidase                                                   |
| 56491 | A heparin-binding domain                                                 | 56491~89811~57362~109843      | APP_N~APP_Cu_bd~APP_E2~APP_amyloid                                                  |
| 56496 | Fibrinogen C-terminal domain-like                                        | 56496                         | Fibrinogen_C                                                                        |
| 56502 | gp120 core                                                               | 56502~56502                   | GP120~GP41                                                                          |
| 56507 | Methionine synthase activation domain-like                               | 82282~51717~47644~52242~56507 | S-methyl_trans~Pterin_bind~B12-binding_2~B12-binding~Met_synt_B12                   |
| 56512 | Nitric oxide (NO) synthase oxygenase domain                              | 56512                         | NO_synthase                                                                         |
| 56519 | Penicillin binding protein dimerisation domain                           | 56519~56601                   | PBP_dimer~Transpeptidase                                                            |
| 56524 | Oxidoreductase molybdopterin-binding domain                              | 56524                         | Oxidored_molyb                                                                      |
| 56529 | FAH                                                                      | 56529                         | FAA_hydrolase                                                                       |
| 56534 | Aromatic aminoacid monooxygenases, catalytic and oligomerization domains | 56534                         | Biopterin_H                                                                         |
| 56542 | Substrate-binding domain of HMG-CoA reductase                            | 56542~55035~56542             | HMG-CoA_red                                                                         |
| 56548 | Conserved core of transcriptional regulatory protein vp16                | 56548                         | Alpha_TIF                                                                           |
| 56553 | Insert subdomain of RNA polymerase alpha subunit                         | 56553~47789                   | RNA_pol_A_bac~RNA_pol_A_CT D                                                        |
| 56558 | Baseplate structural protein gp11                                        | 56558                         | GP11                                                                                |
| 56563 | Major capsid protein gp5                                                 | 56563                         | Phage_capsid                                                                        |
| 56568 | Non-globular alpha+beta subunits of globular proteins                    | 56568~47233~52799             | SicP-binding~YopE~Y_phosphatase                                                     |
| 56574 | Serpins                                                                  | 56574                         | Serpin                                                                              |
| 56596 | Replication terminator protein (Tus)                                     | 56596                         | Ter                                                                                 |
| 56601 | beta-lactamase/transpeptidase-like                                       | 56601                         | Beta-lactamase                                                                      |
| 56634 | Heme-dependent catalase-like                                             | 56634                         | Catalase~Catalase-rel                                                               |
| 56645 | Acyl-CoA dehydrogenase NM domain-like                                    | 56645~47203                   | Acyl-CoA_dh_N~Acyl-CoA_dh_M~Acyl-CoA_dh_1                                           |
| 56655 | Carbohydrate phosphatase                                                 | 56655                         | Inositol_P                                                                          |
| 56672 | DNA/RNA polymerases                                                      | 50630~56672                   | IMS~IMS_HHH~IMS_C                                                                   |
| 56712 | Prokaryotic type I DNA topoisomerase                                     | 56712                         | Toprim~Topoisom_bac                                                                 |
| 56719 | Type II DNA topoisomerase                                                | 56719~101904                  | DNA_topoisoIV~DNA_gyraseA_C~DNA_gyraseA_C~DNA_gyraseA_C~DNA_gyraseA_C~DNA_gyraseA_C |
| 56726 | DNA topoisomerase IV, alpha subunit                                      | 56726                         | TP6A_N                                                                              |
| 56731 | DNA primase core                                                         | 57783~56731                   | zf-CHC2~Toprim_N~Toprim_4~DnaB_bind~DnaG_DnaB_bind                                  |
| 56741 | Eukaryotic DNA topoisomerase I, N-terminal DNA-binding fragment          | 56741~56349                   | Topoisom_I_N~Topoisom_I~Topo_C_assoc                                                |
| 56747 | Prim-pol domain                                                          | 56747                         | DNA_primase_S                                                                       |
| 56752 | D-aminoacid aminotransferase-like PLP-dependent enzymes                  | 56752                         | Aminotran_4                                                                         |
| 56762 | HydB/Nqo4-like                                                           | 56762                         | Complex1_49kDa                                                                      |
| 56770 | HydA/Nqo6-like                                                           | 56770                         | Oxidored_q6                                                                         |
| 56784 | HAD-like                                                                 | 56784                         | HAD_2                                                                               |
| 56796 | Dehydroquinase synthase-like                                             | 56796                         | Fe-ADH                                                                              |

|       |                                                          |                                            |                                                                             |
|-------|----------------------------------------------------------|--------------------------------------------|-----------------------------------------------------------------------------|
| 56801 | Acetyl-CoA synthetase-like                               | 56801                                      | AMP-binding~AMP-binding_C                                                   |
| 56808 | Ribosomal protein L1                                     | 56808                                      | Ribosomal_L1                                                                |
| 56815 | Sec1/munc18-like (SM) proteins                           | 56815                                      | Sec1                                                                        |
| 56821 | Prismane protein-like                                    | 56821                                      | Prismane                                                                    |
| 56826 | Upper collar protein gp10 (connector protein)            | 56826                                      | Phage_connector                                                             |
| 56831 | Reovirus inner layer core protein p3                     | 56831                                      | Orbi_VP3                                                                    |
| 56837 | Colicin                                                  | 56837                                      | Colicin                                                                     |
| 56845 | Diphtheria toxin, middle domain                          | 56399~56845~49380                          | Diphtheria_C~Diphtheria_T~Diphtheria_R                                      |
| 56849 | delta-Endotoxin (insectocide), N-terminal domain         | 56849~51096~49785                          | Endotoxin_N~Endotoxin_M~Endotoxin_C                                         |
| 56854 | Bcl-2 inhibitors of programmed cell death                | 56854                                      | Bcl-2                                                                       |
| 56864 | Exotoxin A, middle domain                                | 49899~56864~56399                          | Exotox-A_bind~Exotox-A_target~Exotox-A_cataly                               |
| 56918 | Light-harvesting complex subunits                        | 56918                                      | LHC                                                                         |
| 56925 | OMPA-like                                                | 56925                                      | Ail_Lom                                                                     |
| 56931 | Outer membrane phospholipase A (OMPLA)                   | 56931                                      | PLA1                                                                        |
| 56935 | Porins                                                   | 56935                                      | Plug~TonB_dep_Rec                                                           |
| 56954 | Outer membrane efflux proteins (OEP)                     | 56954                                      | OEP~OEP                                                                     |
| 56959 | Leukocidin-like                                          | 56959                                      | Leukocidin                                                                  |
| 56968 | Lipovitellin-phosvitin complex; beta-sheet shell regions | 56968~48431~56968~56968                    | Vitellogenin_N~DUF1943~DUF1944~VWD                                          |
| 56973 | Aerolisin/ETX pore-forming domain                        | 56436~56973                                | APT~Aerolysin                                                               |
| 56978 | Perfringolysin                                           | 56978                                      | Thiol_cytolysin                                                             |
| 56983 | Viral glycoprotein, central and dimerisation domains     | 101257~56983~81296~50494~52540~52540~53335 | Flavi_glycoprot~Flavi_glycop_C                                              |
| 56988 | Anthrax protective antigen                               | 56988                                      | PA14~Binary_toxB                                                            |
| 56994 | Insulin-like                                             | 56994                                      | Insulin                                                                     |
| 57007 | Heat-stable enterotoxin B                                | 57007                                      | STb_secrete                                                                 |
| 57011 | Neurotoxin B-IV                                          | 57011                                      | Toxin_13                                                                    |
| 57016 | Plant lectins/antimicrobial peptides                     | 57016~53955                                | Chitin_bind_1~Glyco_hydro_19                                                |
| 57027 | Plant inhibitors of proteinases and amylases             | 57027                                      | Squash                                                                      |
| 57038 | Cyclotides                                               | 57038                                      | Cyclotide                                                                   |
| 57048 | Gurmarin-like                                            | 57048                                      | Antifungal_pept                                                             |
| 57055 | Agouti-related protein                                   | 57055                                      | Agouti                                                                      |
| 57059 | omega toxin-like                                         | 57059                                      | Toxin_12                                                                    |
| 57095 | Scorpion toxin-like                                      | 57095                                      | Toxin_3                                                                     |
| 57180 | Cellulose-binding domain                                 | 57180                                      | CBM_1                                                                       |
| 57184 | Growth factor receptor domain                            | 52058~57184~52058~57184~56112              | Recep_L_domain~Furin-like~Recep_L_domain~GF_recep_IV~Pkinase_Tyr            |
| 57190 | Colipase-like                                            | 57190~57190                                | Prokineticin                                                                |
| 57196 | EGF/Laminin                                              | 57196                                      | Laminin_G_2~Laminin_G_2~Laminin_G_2~EGF~Laminin_G_2~Laminin_G_2~Laminin_G_2 |
| 57243 | Bromelain inhibitor VI (cysteine protease inhibitor)     | 57243~57243~57243~57243~57243,57243        | Inhibitor_I67~Inhibitor_I67~Inhibitor_I67                                   |
| 57247 | Bowman-Birk inhibitor, BBI                               | 57247                                      | Bowman-Birk_leg~Bowman-Birk_leg                                             |



|       |                                                                       |                                     |                                                                |
|-------|-----------------------------------------------------------------------|-------------------------------------|----------------------------------------------------------------|
| 57756 | Retrovirus zinc finger-like domains                                   | 47836~47943~47353~57756             | Gag_p17~Gag_p24~zf-CCHC~zf-CCHC~Gag_p6                         |
| 57770 | Methionyl-tRNA synthetase (MetRS), Zn-domain                          | 52374~57770~52374~47323~50249       | tRNA-synt_1g~tRNA_bind                                         |
| 57774 | Microbial and mitochondrial ADK, insert "zinc finger" domain          | 57774                               | ADK                                                            |
| 57783 | Zinc beta-ribbon                                                      | 57783~56731                         | PhnA_Zn_Ribbon~PhnA                                            |
| 57798 | Casein kinase II beta subunit                                         | 57798                               | CK_II_beta                                                     |
| 57802 | Rubredoxin-like                                                       | 57802                               | Rubredoxin                                                     |
| 57821 | Hypothetical protein MTH1184                                          | 57821                               | DUF1922                                                        |
| 57825 | Aspartate carbamoyltransferase, Regulatory-chain, C-terminal domain   | 54893~57825                         | PyrI~PyrI_C                                                    |
| 57829 | Zn-binding ribosomal proteins                                         | 57829                               | Ribosomal_L33                                                  |
| 57840 | Ribosomal protein L36                                                 | 57840                               | Ribosomal_L36                                                  |
| 57845 | B-box zinc-binding domain                                             | 57850~57845~49899                   | zf-C3HC4_4~zf-B_box~PRY~SPRY                                   |
| 57850 | RING/U-box                                                            | 57850                               | zf-RING_2                                                      |
| 57863 | ArfGap/RecO-like zinc finger                                          | 57863                               | BAR_3~PH~ArfGap~Ank_2                                          |
| 57868 | Metallothionein                                                       | 57868                               | Metallothio                                                    |
| 57879 | Zinc domain conserved in yeast copper-regulated transcription factors | 57879                               | Copper-fist                                                    |
| 57884 | Ada DNA repair protein, N-terminal domain (N-Ada 10)                  | 57884~53155~46767                   | Ada_Zn_binding~HTH_18~Methyltr ansf_1N~DNA_binding_1           |
| 57889 | Cysteine-rich domain                                                  | 57889                               | RBD~C1_1~Pkinase_Tyr                                           |
| 57903 | FYVE/PHD zinc finger                                                  | 57903                               | PHD                                                            |
| 57917 | Zn-binding domains of ADDBP                                           | 47724~57917~57917                   | Viral_DNA_bi~Viral_DNA_Zn_bi~Viral_DNA_Zn_bi                   |
| 57924 | Inhibitor of apoptosis (IAP) repeat                                   | 57924                               | BIR                                                            |
| 57933 | TAZ domain                                                            | 57933~47040~47370~57850~57933~69125 | zf-TAZ~KIX~Bromodomain~DUF902~HAT_KAT11~ZZ~zf-TAZ~Creb_binding |
| 57938 | DnaJ/Hsp40 cysteine-rich domain                                       | 46565~57938~49493                   | DnaJ~DnaJ_C                                                    |
| 63380 | Riboflavin synthase domain-like                                       | 63380~52343                         | Lum_binding~Lum_binding                                        |
| 63393 | RNA polymerase subunits                                               | 63393                               | DNA_RNApol_7kD                                                 |
| 63411 | LuxS/MPP-like metallohydrolase                                        | 63411                               | Peptidase_M16~Peptidase_M16_C                                  |
| 63418 | MurE/MurF N-terminal domain                                           | 63418~53623~53244                   | Mur_ligase~Mur_ligase_M~Mur_ligase_C                           |
| 63433 | Fumarylacetoacetate hydrolase, FAH, N-terminal domain                 | 63433~56529                         | FAA_hydrolase_N~FAA_hydrolase                                  |
| 63446 | Type I dockerin domain                                                | 63446                               | Dockerin_1~Dockerin_1                                          |
| 63451 | LEM domain                                                            | 63451                               | LEM                                                            |
| 63491 | BAG domain                                                            | 63491                               | BAG                                                            |
| 63501 | Frizzled cysteine-rich domain                                         | 63501                               | Fz~Frizzled                                                    |
| 63515 | Outer surface protein C (OspC)                                        | 63515                               | Lipoprotein_6                                                  |
| 63520 | PTS-regulatory domain, PRD                                            | 50151~63520~63520                   | CAT_RBD~PRD~PRD                                                |
| 63562 | RPB6/omega subunit-like                                               | 63562                               | RNA_pol_Rpb6                                                   |
| 63570 | PABC (PABP) domain                                                    | 54928~54928~54928~54928~63570       | RRM_1~RRM_1~RRM_1~RRM_1~PABP                                   |
| 63592 | Flagellar transcriptional activator FlhD                              | 63592                               | FlhD                                                           |
| 63600 | Telomeric repeat binding factor (TRF) dimerisation domain             | 63600~46689                         | TRF~Myb_DNA-binding                                            |
| 63697 | Olfactory marker protein                                              | 63697                               | Olfactory_mark                                                 |
| 63707 | Ganglioside M2 (gm2) activator                                        | 63707                               | E1_DerP2_DerF2                                                 |



|       |                                                                                       |                                                             |                                                                                                                                                                                                               |
|-------|---------------------------------------------------------------------------------------|-------------------------------------------------------------|---------------------------------------------------------------------------------------------------------------------------------------------------------------------------------------------------------------|
| 63712 | Nicotinic receptor ligand binding domain-like                                         | 63712~90112                                                 | Neur_chan_LBD~Neur_chan_memb                                                                                                                                                                                  |
| 63724 | Cytolysin/lectin                                                                      | 63724                                                       | FB_lectin                                                                                                                                                                                                     |
| 63737 | Leukotriene A4 hydrolase N-terminal domain                                            | 63737~55486                                                 | Peptidase_M1~Leuk-A4-hydro_C                                                                                                                                                                                  |
| 63748 | Tudor/PWWP/MBT                                                                        | 63748                                                       | PWWP                                                                                                                                                                                                          |
| 63763 | SAND domain-like                                                                      | 46955~63763                                                 | Ski_Sno~c-SKI_SMAD_bind                                                                                                                                                                                       |
| 63817 | Sortase                                                                               | 63817                                                       | Sortase                                                                                                                                                                                                       |
| 63825 | YWTD domain                                                                           | 57424~57424~57424~57424~57424~57424~57196~57196~63825~57196 | Ldl_recept_a~Ldl_recept_a~Ldl_recept_a~Ldl_recept_a~Ldl_recept_a~Ldl_recept_a~Ldl_recept_a~Ldl_recept_a~FXa_inhibition~EGF_CA~Ldl_recept_b~Ldl_recept_b~Ldl_recept_b~Ldl_recept_b~Ldl_recept_b~FXa_inhibition |
| 63829 | Calcium-dependent phosphotriesterase                                                  | 63829                                                       | SGL                                                                                                                                                                                                           |
| 63840 | Ribonuclease domain of colicin E3                                                     | 63840                                                       | Pyocin_S~Cytotoxic                                                                                                                                                                                            |
| 63848 | Cell-division inhibitor MinC, C-terminal domain                                       | 63848                                                       | MinC_C                                                                                                                                                                                                        |
| 63862 | Thiamin pyrophosphokinase, substrate-binding domain                                   | 63999~63862                                                 | TPK_catalytic~TPK_B1_binding                                                                                                                                                                                  |
| 63867 | MoeA C-terminal domain-like                                                           | 63882~53218~63867                                           | MoeA_N~MoCF_biosynth~MoeA_C                                                                                                                                                                                   |
| 63877 | Methuselah ectodomain                                                                 | 63877                                                       | Methuselah_N~7tm_2                                                                                                                                                                                            |
| 63882 | MoeA N-terminal region -like                                                          | 63882~53218~63867                                           | MoeA_N~MoCF_biosynth~MoeA_C                                                                                                                                                                                   |
| 63887 | P-domain of calnexin/calreticulin                                                     | 49899~63887                                                 | Calreticulin                                                                                                                                                                                                  |
| 63892 | Pyridoxine 5'-phosphate synthase                                                      | 63892                                                       | PdxJ                                                                                                                                                                                                          |
| 63965 | Precorrin-8X methylmutase CbiC/CobH                                                   | 63965                                                       | CbiC                                                                                                                                                                                                          |
| 63992 | Dipeptide transport protein                                                           | 63992                                                       | Peptidase_M55                                                                                                                                                                                                 |
| 63999 | Thiamin pyrophosphokinase, catalytic domain                                           | 63999~63862                                                 | TPK_catalytic~TPK_B1_binding                                                                                                                                                                                  |
| 64005 | Undecaprenyl diphosphate synthase                                                     | 64005                                                       | Prenyltransf                                                                                                                                                                                                  |
| 64043 | Cell-division inhibitor MinC, N-terminal domain                                       | 64043~63848                                                 | MinC_C                                                                                                                                                                                                        |
| 64076 | MTH938-like                                                                           | 64076                                                       | DUF498                                                                                                                                                                                                        |
| 64153 | YjeF N-terminal domain-like                                                           | 64153~53613                                                 | YjeF_N~Carb_kinase                                                                                                                                                                                            |
| 64158 | 2,3-Bisphosphoglycerate-independent phosphoglycerate mutase, substrate-binding domain | 64158~53649                                                 | iPGM_N                                                                                                                                                                                                        |
| 64167 | SurE-like                                                                             | 64167                                                       | SurE                                                                                                                                                                                                          |
| 64182 | DHH phosphoesterases                                                                  | 64182                                                       | DHH~DHHA1                                                                                                                                                                                                     |
| 64210 | Head-to-tail joining protein W, gpW                                                   | 64210                                                       | gpW                                                                                                                                                                                                           |
| 64234 | Photosystem I subunit PsaD                                                            | 64234                                                       | PsaD                                                                                                                                                                                                          |
| 64263 | Prokaryotic ribosomal protein L17                                                     | 64263                                                       | Ribosomal_L17                                                                                                                                                                                                 |
| 64268 | PX domain                                                                             | 64268                                                       | PX                                                                                                                                                                                                            |
| 64288 | Chorismate lyase-like                                                                 | 64288                                                       | GntR~UTRA                                                                                                                                                                                                     |
| 64307 | SirA-like                                                                             | 64307                                                       | TusA                                                                                                                                                                                                          |
| 64356 | SNARE-like                                                                            | 64356                                                       | Clat_adaptor_s                                                                                                                                                                                                |
| 64376 | YlxR-like                                                                             | 64376                                                       | DUF448                                                                                                                                                                                                        |
| 64383 | Cell-division protein ZipA, C-terminal domain                                         | 64383                                                       | ZipA_C                                                                                                                                                                                                        |
| 64397 | Hsp33 domain                                                                          | 64397~118352                                                | HSP33                                                                                                                                                                                                         |

|       |                                                                     |                                                                      |                                                                             |
|-------|---------------------------------------------------------------------|----------------------------------------------------------------------|-----------------------------------------------------------------------------|
| 64438 | CNF1/YfiH-like putative cysteine hydrolases                         | 64438                                                                | Cu-oxidase_4                                                                |
| 64449 | YopH tyrosine phosphatase N-terminal domain                         | 64449~52799                                                          | YopH_N~Y_phosphatase                                                        |
| 64465 | Outer capsid protein sigma 3                                        | 64465                                                                | Reovirus_cap                                                                |
| 64484 | beta and beta-prime subunits of DNA dependent RNA-polymerase        | 64484                                                                | RNA_pol_Rpb2_2~RNA_pol_Rpb2_3~RNA_pol_Rpb2_45~RNA_pol_Rpb2_6~RNA_pol_Rpb2_7 |
| 64496 | DNA-binding domain of intron-encoded endonucleases                  | 54060~64496                                                          | NUMOD4~HNH_3                                                                |
| 64518 | Phase 1 flagellin                                                   | 64518                                                                | Flagellin_N~Flagellin_C                                                     |
| 64546 | Satiety factor CART (cocaine and amphetamine regulated transcript)  | 64546                                                                | CART                                                                        |
| 64571 | Cellulose docking domain, docking                                   | 64571~64571~51989                                                    | CBM_10~CBM_10~Glyco_hydro_6                                                 |
| 64586 | C-terminal domain of ProRS                                          | 55681~64586                                                          | tRNA-synt_2b~HGTP_anticodon~ProRS-C_1                                       |
| 68906 | SAP domain                                                          | 68906                                                                | PINIT~zf-MIZ                                                                |
| 68912 | Rho N-terminal domain-like                                          | 68912~50249~52540                                                    | Rho_N~Rho_RNA_bind~ATP-synt_ab                                              |
| 68918 | Recombination endonuclease VII, C-terminal and dimerization domains | 54060~68918                                                          | Endonuclease_7~Endonuc-dimeris                                              |
| 68923 | PEP carboxykinase N-terminal domain                                 | 68923~53795                                                          | PEPCK_ATP                                                                   |
| 68930 | Protein-L-isoaspartyl O-methyltransferase, C-terminal domain        | 53335~68930                                                          | PCMT                                                                        |
| 68989 | Hemolysin expression modulating protein HHA                         | 68989                                                                | HHA                                                                         |
| 68993 | FAT domain of focal adhesion kinase                                 | 54236~47031~50729~56112~68993                                        | FERM_M~Pkinase_Tyr~Focal_AT                                                 |
| 69000 | FAD-dependent thiol oxidase                                         | 69000                                                                | Evr1_Alr                                                                    |
| 69008 | RecG, N-terminal domain                                             | 69008~50249~52540~52540                                              | DEAD~Helicase_C                                                             |
| 69012 | alpha-ketoacid dehydrogenase kinase, N-terminal domain              | 69012~55874                                                          | BCDHK_Adom3~HATPase_c                                                       |
| 69025 | Hypothetical protein MTH865                                         | 69025                                                                | MTH865                                                                      |
| 69036 | Bcr-Abl oncoprotein oligomerization domain                          | 69036~48065~48350                                                    | Bcr-Abl_Oligo~RhoGEF~C2~RhoGAP                                              |
| 69047 | Hypothetical protein YjbJ                                           | 69047                                                                | CsbD                                                                        |
| 69055 | 1-deoxy-D-xylulose-5-phosphate reductoisomerase, C-terminal domain  | 51735~55347~51735~69055                                              | DXP_reductoisom~DXP_redisom_C~DXPR_C                                        |
| 69060 | Arp2/3 complex 21 kDa subunit ARPC3                                 | 69060                                                                | P21-Arc                                                                     |
| 69065 | RNase III domain-like                                               | 69065~54768                                                          | Ribonucleas_3_3~dsrm                                                        |
| 69070 | Anti-sigma factor AsiA                                              | 69070                                                                | AsiA                                                                        |
| 69075 | Glutamyl tRNA-reductase dimerization domain                         | 69742~51735~69075                                                    | GlutR_N~Shikimate_DH~GlutR_dimer                                            |
| 69099 | Ran-GTPase activating protein 1 (RanGAP1), C-terminal domain        | 52047~69099~69099~52058~52058<br>52047~69099~52058~52058~52058~52058 | RanGAP1_C                                                                   |
| 69103 | Arp2/3 complex 16 kDa subunit ARPC5                                 | 69103                                                                | P16-Arc                                                                     |
| 69118 | AhpD-like                                                           | 69118                                                                | CMD                                                                         |
| 69125 | Nuclear receptor coactivator interlocking domain                    | 55785~69125                                                          | zf-TAZ~KIX~Bromodomain~DUF902                                               |

|       |                                                                |                                |                                                                  |
|-------|----------------------------------------------------------------|--------------------------------|------------------------------------------------------------------|
|       |                                                                |                                | ~HAT_KAT11~ZZ~zf-TAZ~Creb_binding                                |
| 69131 | Quinohemoprotein amine dehydrogenase C chain                   | 69131                          | QH-AmDH_gamma                                                    |
| 69179 | Integrin domains                                               | 69318~69179~69179~69179        | FG-GAP~FG-GAP~Integrin_alpha2                                    |
| 69189 | Penicillin-binding protein associated domain                   | 56601~69189                    | Peptidase_S11~PBP5_C                                             |
| 69203 | Nucleoplasmin-like core domain                                 | 69203                          | Nucleoplasmin                                                    |
| 69255 | gp5 N-terminal domain-like                                     | 69279~69279~69255              | Phage_GPD~T6SS_Vgr~DUF2345                                       |
| 69279 | Phage tail proteins                                            | 69279                          | Phage_GPD                                                        |
| 69287 | Urease metallochaperone UreE, N-terminal domain                | 69287~69737                    | UreE_N~UreE_C                                                    |
| 69298 | Quinohemoprotein amine dehydrogenase A chain, domain 3         | 46626~46626~69298~81296~81296  | Dehyd-heme_bind~Qn_am_d_aII~Qn_am_d_aIII~Qn_am_d_aIV             |
| 69304 | Tricorn protease N-terminal domain                             | 69304~52096<br>69304           |                                                                  |
| 69318 | Integrin alpha N-terminal domain                               | 69318                          | FG-GAP~FG-GAP~Integrin_alpha2                                    |
| 69322 | Tricorn protease domain 2                                      | 69304~69322~52096              | Tricorn_C1~Tricorn_PDZ~Peptidase_S41                             |
| 69336 | Alpha subunit of glutamate synthase, C-terminal domain         | 56235~51395~69336              | GATase_2~Glu_syn_central~Glu_synthase~GXGXG                      |
| 69340 | C-terminal domain of adenylcyclase associated protein          | 101278~69340                   | CAP_N~CAP_C                                                      |
| 69349 | Phage fibre proteins                                           | 69349                          | Hyaluronidase_1                                                  |
| 69360 | Cell wall binding repeat                                       | 69360                          | CW_binding_1~CW_binding_1~CW_binding_1~CW_binding_1~CW_binding_1 |
| 69369 | Cloacin translocation domain                                   | 69369                          | Cloacin                                                          |
| 69500 | DTD-like                                                       | 69500                          | Tyr_Deacylase                                                    |
| 69572 | Activating enzymes of the ubiquitin-like proteins              | 69572                          | ThiF                                                             |
| 69593 | Glycerol-3-phosphate (1)-acyltransferase                       | 69593                          | GPAT_N~Acyltransferase                                           |
| 69618 | HemD-like                                                      | 69618                          | HEM4                                                             |
| 69635 | Type III secretory system chaperone-like                       | 69635                          | CesT                                                             |
| 69645 | Arp2/3 complex subunits                                        | 69645                          | P34-Arc                                                          |
| 69652 | DNA-binding C-terminal domain of the transcription factor MotA | 46785~69652                    | MotA_activ~MotCF                                                 |
| 69687 | Integrin beta tail domain                                      | 103575~53300~57196~57196~69687 | Integrin_beta~EGF_2~Integrin_B_tail~Integrin_b_cyt               |
| 69695 | SRP19                                                          | 69695                          | SRP19                                                            |
| 69705 | Transcription factor NusA, N-terminal domain                   | 69705~50249~54814~54814        | NusA_N~S1~KH_5                                                   |
| 69721 | DsrC, the gamma subunit of dissimilatory sulfite reductase     | 69721                          | DsrC                                                             |
| 69737 | Urease metallochaperone UreE, C-terminal domain                | 69287~69737                    | UreE_N~UreE_C                                                    |
| 69742 | Glutamyl tRNA-reductase catalytic, N-terminal domain           | 69742~51735                    | GlutR_N~Shikimate_DH~GlutR_dimer                                 |
| 69754 | Ribosome binding protein Y (YfiA homologue)                    | 69754                          | Ribosomal_S30AE~Ribosom_S30AE_C                                  |
| 69761 | GTP cyclohydrolase I feedback regulatory protein, GFRP         | 69761                          | GFRP                                                             |
| 69765 | IpsF-like                                                      | 69765                          | YgbB                                                             |

|       |                                                                          |                                                 |                                                                                                                                  |
|-------|--------------------------------------------------------------------------|-------------------------------------------------|----------------------------------------------------------------------------------------------------------------------------------|
| 69786 | YggU-like                                                                | 69786                                           | DUF167                                                                                                                           |
| 69796 | Thymidylate synthase-complementing protein Thy1                          | 69796                                           | Thy1                                                                                                                             |
| 69819 | MTH1598-like                                                             | 69819                                           | Archease                                                                                                                         |
| 69848 | LCCL domain                                                              | 69848~53300~53300                               | LCCL~VWA~VWA                                                                                                                     |
| 69864 | Argininosuccinate synthetase, C-terminal domain                          | 52402~69864                                     | Arginosuc_synth                                                                                                                  |
| 69903 | NSP3 homodimer                                                           | 69903                                           | Rota_NS3                                                                                                                         |
| 69908 | Membrane penetration protein mu1                                         | 69908                                           | Reovirus_M2                                                                                                                      |
| 69917 | OMPT-like                                                                | 69917                                           | Omptin                                                                                                                           |
| 69922 | Head and neck region of the ectodomain of NDV fusion glycoprotein        | 69922                                           | Fusion_gly                                                                                                                       |
| 69964 | Pheromone ER-23                                                          | 69964                                           |                                                                                                                                  |
| 74650 | Galactose mutarotase-like                                                | 74650                                           | Aldose_epim                                                                                                                      |
| 74653 | TolA/TonB C-terminal domain                                              | 74653                                           | TonB_C                                                                                                                           |
| 74731 | Ribosomal protein L20                                                    | 74731                                           | Ribosomal_L20                                                                                                                    |
| 74748 | Variable surface antigen VlsE                                            | 74748                                           | Lipoprotein_2                                                                                                                    |
| 74778 | Aconitase B, N-terminal domain                                           | 74778~52016~53732                               | Aconitase_B_N~Aconitase_2_N~Aconitase                                                                                            |
| 74784 | Translin                                                                 | 74784                                           | Translin                                                                                                                         |
| 74788 | Cullin repeat-like                                                       | 74788~75632~46785                               | Cullin~Cullin_Nedd8                                                                                                              |
| 74853 | Lamin A/C globular tail domain                                           | 74853                                           | Filament~LTD                                                                                                                     |
| 74863 | Thiol:disulfide interchange protein DsbD, N-terminal domain (DsbD-alpha) | 74863~52833                                     | DsbC~DsbD~Thioredoxin_7                                                                                                          |
| 74877 | Major surface antigen p30, SAG1                                          | 74877~74877                                     | SAG~SAG                                                                                                                          |
| 74914 | V-region of surface antigen I/II (SA I/II, PAC)                          | 74914                                           | Strep_SA_rep~Strep_SA_rep~Strep_SA_rep~Strep_SA_rep~Strep_SA_rep~Strep_SA_rep~GbpC~Antigen_C~Antigen_C~Antigen_C~Gram_pos_anchor |
| 74924 | Cap-Gly domain                                                           | 74924                                           | CAP_GLY                                                                                                                          |
| 74942 | YhbC-like, C-terminal domain                                             | 75420~74942                                     | DUF150                                                                                                                           |
| 74982 | Small protein B (SmpB)                                                   | 74982                                           | SmpB                                                                                                                             |
| 75001 | Dipeptidyl peptidase I (cathepsin C), exclusion domain                   | 75001~54001                                     | CathepsinC_exc~Peptidase_C1                                                                                                      |
| 75005 | Arabinanase/levansucrase/invertase                                       | 75005                                           | Glyco_hydro_43                                                                                                                   |
| 75011 | 3-carboxy-cis,cis-mucoante lactonizing enzyme                            | 75011                                           | Lactonase                                                                                                                        |
| 75098 | Monomethylamine methyltransferase MtmB                                   | 75098                                           | MtmB                                                                                                                             |
| 75138 | HprK N-terminal domain-like                                              | 75138~53795                                     | Hpr_kinase_N~Hpr_kinase_C                                                                                                        |
| 75169 | DsrEFH-like                                                              | 75169                                           | DrsE                                                                                                                             |
| 75181 | Hypothetical protein MTH777 (MT0777)                                     | 75181                                           | DUF1890                                                                                                                          |
| 75217 | alpha/beta knot                                                          | 75217                                           | Methyltrans_RNA                                                                                                                  |
| 75304 | Amidase signature (AS) enzymes                                           | 75304                                           | Amidase                                                                                                                          |
| 75347 | Rotavirus NSP2 fragment, C-terminal domain                               | 75574~75347                                     | Rota_NS35                                                                                                                        |
| 75399 | Plakin repeat                                                            | 47576~47576~75399~75399~75399~75399~75399~75399 | Plectin~Plectin~Plectin~Plectin~Plectin~Plectin~Plectin~Plectin                                                                  |
| 75404 | VSV matrix protein                                                       | 75404                                           | Vesiculo_matrix                                                                                                                  |
| 75412 | Hypothetical protein MTH1880                                             | 75412                                           | DUF749                                                                                                                           |



|       |                                                                                                          |             |                |
|-------|----------------------------------------------------------------------------------------------------------|-------------|----------------|
| 81415 | Mitochondrial cytochrome c oxidase subunit VIc                                                           | 81415       | COX6C          |
| 81419 | Mitochondrial cytochrome c oxidase subunit VIIa                                                          | 81419       | COX7a          |
| 81423 | Mitochondrial cytochrome c oxidase subunit VIIb                                                          | 81423       | COX7B          |
| 81427 | Mitochondrial cytochrome c oxidase subunit VIIc (aka VIIIa)                                              | 81427       | COX7C          |
| 81431 | Mitochondrial cytochrome c oxidase subunit VIIIb (aka IX)                                                | 81431       | COX8           |
| 81442 | Cytochrome c oxidase subunit I-like                                                                      | 81442       | COX1           |
| 81452 | Cytochrome c oxidase subunit III-like                                                                    | 81452       | COX3           |
| 81464 | Cytochrome c oxidase subunit II-like, transmembrane region                                               | 81464~49503 | COX2_TM~COX2   |
| 81469 | Bacterial aa3 type cytochrome c oxidase subunit IV                                                       | 81469       | COX4_pro_2     |
| 81473 | Bacterial ba3 type cytochrome c oxidase subunit IIa                                                      | 81473       | CoxIIa         |
| 81483 | Bacterial photosystem II reaction centre, L and M subunits                                               | 81483       | Photo_RC       |
| 81490 | Photosystem II reaction centre subunit H, transmembrane region                                           | 81490~50346 | PRCH~PRC       |
| 81496 | Cytochrome c1 subunit of cytochrome bc1 complex (Ubiquinol-cytochrome c reductase), transmembrane anchor | 46626~81496 | Cytochrom_C1   |
| 81502 | ISP transmembrane anchor                                                                                 | 81502~50022 | UCR_TM         |
| 81508 | Ubiquinone-binding protein QP-C of cytochrome bc1 complex (Ubiquinol-cytochrome c reductase)             | 81508       | UcrQ           |
| 81514 | Subunit X (non-heme 7 kDa protein) of cytochrome bc1 complex (Ubiquinol-cytochrome c reductase)          | 81514       | UCR_UQCRX_QCR9 |
| 81518 | Subunit XI (6.4 kDa protein) of cytochrome bc1 complex (Ubiquinol-cytochrome c reductase)                | 81518       | UCR_6-4kD      |
| 81524 | 14 kDa protein of cytochrome bc1 complex (Ubiquinol-cytochrome c reductase)                              | 81524       | UCR_14kD       |
| 81531 | Non-heme 11 kDa protein of cytochrome bc1 complex (Ubiquinol-cytochrome c reductase)                     | 81531       | UCR_hinge      |
| 81536 | Subunit III of photosystem I reaction centre, PsaF                                                       | 81536       | PSI_PsaF       |
| 81540 | Subunit VIII of photosystem I reaction centre, PsaI                                                      | 81540       | PSI_8          |
| 81544 | Subunit IX of photosystem I reaction centre, PsaJ                                                        | 81544       | PSI_PsaJ       |
| 81548 | Subunit XII of photosystem I reaction centre, PsaM                                                       | 81548       | PsaM           |
| 81552 | Subunit PsaX of photosystem I reaction centre                                                            | 81552       | PsaX           |
| 81558 | Photosystem I subunits PsaA/PsaB                                                                         | 81558       | PsaA_PsaB      |
| 81563 | Photosystem I reaction center subunit X, PsaK                                                            | 81563       | PSI_PSAK       |
| 81568 | Photosystem I reaction center subunit XI, PsaL                                                           | 81568       | PsaL           |







|       |                                                                                 |                                            |                                                            |
|-------|---------------------------------------------------------------------------------|--------------------------------------------|------------------------------------------------------------|
| 82657 | BolA-like                                                                       | 82657                                      | BolA                                                       |
| 82671 | SEA domain                                                                      | 82671                                      | SEA                                                        |
| 82679 | N-utilization substance G protein NusG, N-terminal domain                       | 82679~50104                                | NusG~KOW                                                   |
| 82689 | Mechanosensitive channel protein MscS (YggB), C-terminal domain                 | 82861~50182~82689                          | MS_channel                                                 |
| 82693 | Multidrug efflux transporter AcrB pore domain; PN1, PN2, PC1 and PC2 subdomains | 82693~82714~82866~82693~82714~82866        | ACR_tran                                                   |
| 82697 | PurS-like                                                                       | 82697~109736~55326~56042~55326~56042~52317 | AIRS_C~AIRS_C~GATase_5                                     |
| 82704 | AlbA-like                                                                       | 82704                                      | Alba                                                       |
| 82708 | R3H domain                                                                      | 82708                                      | R3H~SUZ                                                    |
| 82714 | Multidrug efflux transporter AcrB TolC docking domain; DN and DC subdomains     | 82693~82714~82866~82693~82714~82866        | ACR_tran                                                   |
| 82754 | C-terminal, gelsolin-like domain of Sec23/24                                    | 81995~82919~53300~81995~81811~82754        | zf-Sec23_Sec24~Sec23_trunk~Sec23_BS~Sec23_helical~Gelsolin |
| 82771 | GIY-YIG endonuclease                                                            | 82771                                      | GIY-YIG                                                    |
| 82784 | OsmC-like                                                                       | 82784                                      | OsmC                                                       |
| 82808 | Replication modulator SeqA, C-terminal DNA-binding domain                       | 47598~82808                                | SeqA                                                       |
| 82829 | MesJ substrate recognition domain-like                                          | 52402~82829~56037                          | ATP_bind_3~TilS~TilS_C                                     |
| 82856 | L-A virus major coat protein                                                    | 82856                                      | LA-virus_coat                                              |
| 82861 | Mechanosensitive channel protein MscS (YggB), transmembrane region              | 82861~50182~82689                          | MS_channel                                                 |
| 82866 | Multidrug efflux transporter AcrB transmembrane domain                          | 82693~82714~82866~82693~82714~82866        | ACR_tran                                                   |
| 82895 | TSP-1 type 1 repeat                                                             | 55486~82895                                | I-set~TSP_1~TSP_1~ZU5~Death                                |
| 82910 | Apical membrane antigen 1                                                       | 82910                                      | AMA-1                                                      |
| 82919 | Zn-finger domain of Sec23/24                                                    | 81995~82919~53300~81995~81811~82754        | zf-Sec23_Sec24~Sec23_trunk~Sec23_BS~Sec23_helical~Gelsolin |
| 82927 | Cysteine-rich DNA binding domain, (DM domain)                                   | 82927                                      | DM                                                         |
| 88633 | Positive stranded ssRNA viruses                                                 | 88633                                      | Rhv                                                        |
| 88645 | ssDNA viruses                                                                   | 88645                                      | Parvo_coat                                                 |
| 88648 | Group I dsDNA viruses                                                           | 88648                                      | Late_protein_L1                                            |
| 88650 | Satellite viruses                                                               | 88650                                      | Potex_coat                                                 |
| 88659 | Sigma3 and sigma4 domains of RNA polymerase sigma factors                       | 88946~88659                                | Sigma70_r2~Sigma70_r3~Sigma70_r4                           |
| 88688 | Families 57/38 glycoside transferase middle domain                              | 88713~88688                                | Glyco_hydro_38~Alpha-mann_mid~Glyco_hydro_38C              |
| 88697 | PUA domain-like                                                                 | 88697                                      | LON_substr_bdg~AAA~Lon_C                                   |
| 88713 | Glycoside hydrolase/deacetylase                                                 | 88713                                      | Polysacc_deac_1                                            |
| 88723 | PIN domain-like                                                                 | 88723~47807~53098~56672                    | 5_3_exonuc_N~5_3_exonuc~DNA_pol_A_exo1~DNA_pol_A           |
| 88798 | N-terminal, heterodimerisation domain of RBP7 (RpoE)                            | 88798                                      | SHS2_Rpb7-N~S1                                             |
| 88802 | Pre-PUA domain                                                                  | 88802~88697                                | UPF0113                                                    |
| 88874 | Receptor-binding domain of short tail fibre protein gp12                        | 88874                                      | gp12-short_mid~Collar~S_tail_recep_bd                      |
| 88946 | Sigma2 domain of RNA polymerase sigma factors                                   | 88946~88659                                | Sigma70_r2~Sigma70_r4_2                                    |

|       |                                                                        |                                           |                                                                             |
|-------|------------------------------------------------------------------------|-------------------------------------------|-----------------------------------------------------------------------------|
| 89000 | post-HMGL domain-like                                                  | 51569~89000                               | HMGL-like~PYC_OADA~Biotin_lipoyl                                            |
| 89009 | GAT-like domain                                                        | 48464~89009                               | ANTH                                                                        |
| 89028 | Cobalamin adenosyltransferase-like                                     | 89028                                     | Cob_adeno_trans                                                             |
| 89043 | Soluble domain of poliovirus core protein 3a                           | 88633~88633~88633~50494~89043~50494~56672 | Pico_P1A~Rhv~Rhv~Rhv~Pico_P2A~Pico_P2B~RNA_helicase~P3A~Peptidase_C3~RdRP_1 |
| 89064 | Replisome organizer (g39p helicase loader/inhibitor protein)           | 89064                                     | Inhibitor_G39P                                                              |
| 89069 | N-terminal, cytoplasmic domain of anti-sigmaE factor RseA              | 89069                                     | RseA_N~RseA_C                                                               |
| 89082 | Antibiotic binding domain of TipA-like multidrug resistance regulators | 46955~89082                               | MerR_1~TipAS                                                                |
| 89095 | GatB/YqeY motif                                                        | 55931~89095                               | YqeY                                                                        |
| 89124 | Nop domain                                                             | 89124                                     | NOP5NT~Nop                                                                  |
| 89155 | TorD-like                                                              | 89155                                     | Nitrate_red_del                                                             |
| 89162 | Gametocyte protein Pfg27                                               | 89162                                     | Pfg27                                                                       |
| 89232 | Hypothetical protein TM1070                                            | 89232                                     | ASRT                                                                        |
| 89260 | Collagen-binding domain                                                | 89260                                     | Peptidase_M9_N~Peptidase_M9~PPC                                             |
| 89360 | HesB-like domain                                                       | 89360                                     | Fe-S_biosyn                                                                 |
| 89372 | Fucose-specific lectin                                                 | 89372                                     | Fungal_lectin                                                               |
| 89392 | Prokaryotic lipoproteins and lipoprotein localization factors          | 89392                                     | LolA                                                                        |
| 89428 | Adsorption protein p2                                                  | 89428                                     | Prd1-P2                                                                     |
| 89433 | Baseplate structural protein gp8                                       | 89433                                     | Phage-Gp8                                                                   |
| 89442 | Hypothetical protein YojF                                              | 89442                                     | DUF1806                                                                     |
| 89447 | AbrB/MazE/MraZ-like                                                    | 89447                                     | MraZ~MraZ                                                                   |
| 89550 | PHP domain-like                                                        | 89550                                     | PHP                                                                         |
| 89562 | RraA-like                                                              | 89562                                     | Methyltransf_6                                                              |
| 89623 | Ribose/Galactose isomerase RpiB/AlsB                                   | 89623                                     | LacAB_rpiB                                                                  |
| 89733 | L-sulfolactate dehydrogenase-like                                      | 89733                                     | Ldh_2                                                                       |
| 89796 | CoA-transferase family III (CaiB/BaiF)                                 | 89796                                     | CoA_transf_3                                                                |
| 89807 | Dodecin-like                                                           | 89807                                     | Dodecin                                                                     |
| 89811 | Amyloid beta a4 protein copper binding domain (domain 2)               | 56491~89811~57362~109843                  | APP_N~APP_Cu_bd~APP_E2~APP_amyloid                                          |
| 89817 | Mago nashi protein                                                     | 89817                                     | Mago_nashi                                                                  |
| 89837 | Doublecortin (DC)                                                      | 89837                                     | DCX~DCX                                                                     |
| 89872 | Inhibitor of vertebrate lysozyme, Ivy                                  | 89872                                     | Ivy                                                                         |
| 89890 | Proguanylin                                                            | 89890                                     | Guanylin                                                                    |
| 89895 | FYSH domain                                                            | 89895                                     | SBDS~SBDS_C                                                                 |
| 89915 | DNA-binding protein Tfx                                                | 89915                                     | Sigma70_r4~TFX_C                                                            |
| 89919 | Ribosome-binding factor A, RbfA                                        | 89919                                     | RBFA                                                                        |
| 89942 | eEF1-gamma domain                                                      | 47616~89942                               | GST_N~GST_C~EF1G                                                            |
| 89946 | Hypothetical protein VC0424                                            | 89946                                     | RraB                                                                        |
| 89957 | MTH1187/YkoF-like                                                      | 89957                                     | Thiamine_BP                                                                 |
| 89963 | YajQ-like                                                              | 89963~89963                               | DUF520                                                                      |
| 89975 | Hypothetical protein Yml108w                                           | 89975                                     | DUF1892                                                                     |
| 90002 | Hypothetical protein YjiA, C-terminal domain                           | 52540~90002                               | cobW~CobW_C                                                                 |
| 90064 | Hypothetical protein TM0875                                            | 90064                                     | DUF3855                                                                     |
| 90073 | GCM domain                                                             | 90073                                     | GCM                                                                         |



|        |                                                                   |                                                              |                                                                                                                                                                                            |
|--------|-------------------------------------------------------------------|--------------------------------------------------------------|--------------------------------------------------------------------------------------------------------------------------------------------------------------------------------------------|
| 100950 | NagB/RpiA/CoA transferase-like                                    | 100950                                                       | CoA_trans                                                                                                                                                                                  |
| 100957 | Dimerization cofactor of HNF-1 alpha                              | 100957~47413~46689                                           | HNF-1_N~Homeobox~HNF-1B_C~HNF-1A_C                                                                                                                                                         |
| 100966 | Translation initiation factor 2 beta, aIF2beta, N-terminal domain | 100966~75689                                                 | eIF-5_eIF-2B                                                                                                                                                                               |
| 100985 | Sporulation inhibitor Sda                                         | 100985                                                       | Sda                                                                                                                                                                                        |
| 101059 | B-form DNA mimic Ocr                                              | 101059                                                       | ocr                                                                                                                                                                                        |
| 101082 | Typo IV secretion system protein TraC                             | 101082                                                       | T4SS                                                                                                                                                                                       |
| 101089 | Phosphoprotein XD domain                                          | 101089                                                       | Paramyxo_PNT~Paramyx_P_V_C                                                                                                                                                                 |
| 101094 | Staphylocoagulase                                                 | 101094~101094                                                | Coagulase                                                                                                                                                                                  |
| 101112 | Oxygen-evolving enhancer protein 3,                               | 101112                                                       | PsbQ                                                                                                                                                                                       |
| 101116 | Flagellar export chaperone FliS                                   | 101116                                                       | FliS                                                                                                                                                                                       |
| 101125 | Colicin D immunity protein                                        | 101125                                                       | Colicin_immun                                                                                                                                                                              |
| 101148 | Plant invertase/pectin methylesterase inhibitor                   | 101148                                                       | PMEI                                                                                                                                                                                       |
| 101152 | Mob1/phocein                                                      | 101152                                                       | Mob1_phocein                                                                                                                                                                               |
| 101156 | Nonstructural protein ns2, Nep, M1-binding domain                 | 101156                                                       | Flu_NS2                                                                                                                                                                                    |
| 101160 | Dimerisation domain of CENP-B                                     | 46689~46689~101160                                           | CENP-B_N~HTH_Tnp_Tc5~DDE_1~CENP-B_dimeris                                                                                                                                                  |
| 101166 | Docking domain A of the erythromycin polyketide synthase (DEBS)   | 53901~53901~51735~51735~47336~53901~51735~51735~47336~101166 | Docking~ketoacyl-synt~Ketoacyl-synt_C~KAsynt_C_assoc~Acyl_transf_1~KR~PP-binding~ketoacyl-synt~Ketoacyl-synt_C~KAsynt_C_assoc~Acyl_transf_1~PS-DH~ADH_zinc_N~KR~PP-binding~Erythro-docking |
| 101173 | Docking domain B of the erythromycin polyketide synthase (DEBS)   | 101173                                                       | Docking                                                                                                                                                                                    |
| 101215 | KaiA/RbsU domain                                                  | 101215                                                       | RsbU_N~SpoIIE                                                                                                                                                                              |
| 101224 | HAND domain of the nucleosome remodeling ATPase ISWI              | 52540~52540~101224~46689~46689                               | SNF2_N~Helicase_C~HAND~SLIDE                                                                                                                                                               |
| 101233 | PWI domain                                                        | 101233                                                       | PWI                                                                                                                                                                                        |
| 101238 | XPC-binding domain                                                | 54236~46934~101238~46934                                     | ubiquitin~UBA~XPC-binding~UBA                                                                                                                                                              |
| 101257 | Flavivirus capsid protein C                                       | 101257~56983~81296~50494~52540~52540~53335                   | Flavi_capsid~Flavi_propep~Flavi_M~Flavi_glycoprot~Flavi_glycop_C~Flavi_NS1~Flavi_NS2A~Flavi_NS2B~Peptidase_S7~Flavi_DEAD~Flavi_NS4A~Flavi_NS4B~FtsJ~Flavi_NS5                              |
| 101262 | Methenyltetrahydrofolate cyclohydrolase-like                      | 101262                                                       | FTCD_C                                                                                                                                                                                     |
| 101278 | N-terminal domain of adenylcyclase associated protein, CAP        | 101278~69340                                                 | CAP_N~CAP_C                                                                                                                                                                                |
| 101283 | GRIP domain                                                       | 101283                                                       | GRIP                                                                                                                                                                                       |
| 101288 | L27 domain                                                        | 101288~50156~50044~52540                                     | L27~L27~PDZ~SH3_2~Guanylate_kin                                                                                                                                                            |
| 101307 | YutG-like                                                         | 101307                                                       | PgpA                                                                                                                                                                                       |
| 101312 | Invasion protein A (SipA) , C-terminal actin binding domain       | 140746~101312                                                | SipA                                                                                                                                                                                       |
| 101322 | YcfC-like                                                         | 101322                                                       | DUF489                                                                                                                                                                                     |
| 101327 | YgfB-like                                                         | 101327                                                       | UPF0149                                                                                                                                                                                    |

|        |                                                                     |                                                      |                                                                                                                 |
|--------|---------------------------------------------------------------------|------------------------------------------------------|-----------------------------------------------------------------------------------------------------------------|
| 101332 | Hypothetical protein MTH393                                         | 101332                                               | DUF1959                                                                                                         |
| 101344 | Superantigen MAM                                                    | 101344                                               | MA-Mit                                                                                                          |
| 101353 | Putative anticodon-binding domain of alanyl-tRNA synthetase (AlaRS) | 55681~101353~55186                                   | tRNA-synt_2c~tRNA_SAD~DHHA1                                                                                     |
| 101386 | all-alpha NTP pyrophosphatases                                      | 101386                                               | PRA-CH~PRA-PH                                                                                                   |
| 101391 | Hsp90 co-chaperone CDC37                                            | 101391                                               | CDC37_N~CDC37_M~CDC37_C                                                                                         |
| 101399 | P40 nucleoprotein                                                   | 101399                                               | BDV_P40                                                                                                         |
| 101420 | C-terminal domain of Ku80                                           | 53300~100939~101420                                  | Ku_N~Ku~Ku_C~Ku_PK_bind                                                                                         |
| 101424 | Hypothetical protein ST1625                                         | 101424                                               | DUF1955                                                                                                         |
| 101447 | Formin homology 2 domain (FH2 domain)                               | 101447                                               | FH2                                                                                                             |
| 101473 | DhaL-like                                                           | 101473                                               | Dak2                                                                                                            |
| 101478 | ADP-ribosylglycohydrolase                                           | 101478                                               | ADP_ribosyl_GH                                                                                                  |
| 101489 | Eukaryotic initiation factor 4f subunit eIF4g, eIF4e-binding domain | 101489                                               | eIF_4G1~MIF4G                                                                                                   |
| 101494 | Stathmin                                                            | 101494                                               | Stathmin                                                                                                        |
| 101498 | Anti-sigma factor FlgM                                              | 101498                                               | FlgM                                                                                                            |
| 101542 | Fungal immunomodulatory protein, FIP                                | 101542                                               | Fve                                                                                                             |
| 101546 | ASF1-like                                                           | 101546                                               | ASF1_hist_chap                                                                                                  |
| 101576 | Supernatant protein factor (SPF), C-terminal domain                 | 46938~52087~101576                                   | CRAL_TRIO                                                                                                       |
| 101596 | Dextranase, N-terminal domain                                       | 101596~51126                                         | Glyco_hydro_49                                                                                                  |
| 101601 | Smp-1-like                                                          | 101601                                               | DUF1935~Peptidase_C2                                                                                            |
| 101606 | Superantigen (mitogen) Ypm                                          | 101606                                               | YpM                                                                                                             |
| 101690 | PAZ domain                                                          | 101690                                               | ArgoN~ArgoL1~PAZ~ArgoL2~ArgoMid~Piwi                                                                            |
| 101697 | Hypothetical protein YfhH                                           | 101697                                               | DUF1811                                                                                                         |
| 101738 | SspB-like                                                           | 101738                                               | SspB                                                                                                            |
| 101744 | Rof/RNase P subunit-like                                            | 101744                                               | UPF0086                                                                                                         |
| 101751 | Hydrophobin II, HfbII                                               | 101751                                               | Hydrophobin_2                                                                                                   |
| 101756 | Hypothetical protein YgiW                                           | 101756                                               | BOF                                                                                                             |
| 101790 | Aminomethyltransferase beta-barrel domain                           | 103025~101790                                        | GCV_T~GCV_T_C                                                                                                   |
| 101801 | Surface presentation of antigens (SPOA)                             | 101801                                               | FliMN_C                                                                                                         |
| 101816 | Replicase NSP9                                                      | 52949~50494~140367~143076~101816~144246~53335~142877 | Macro~Viral_protease~Corona_NSP4_C~Peptidase_C30~nsp7~nsp8~nsp9~NSP10~Corona_RPol_N~Viral_helicase1~NSP11~NSP13 |
| 101821 | Aminopeptidase/glucanase lid domain                                 | 101821                                               | Peptidase_M42                                                                                                   |
| 101852 | Bacterial fluorinating enzyme, C-terminal domain                    | 101852                                               | SAM_adeno_trans                                                                                                 |
| 101874 | YceI-like                                                           | 101874                                               | YceI                                                                                                            |
| 101887 | Apyrase                                                             | 101887                                               | Apyrase                                                                                                         |
| 101898 | NHL repeat                                                          | 101898                                               | zf-RING_UBOX~zf-B_box~Filamin~NHL~NHL~NHL~NHL~NHL~NHL                                                           |
| 101904 | GyrA/ParC C-terminal domain-like                                    | 56719~101904                                         | DNA_topoisoIV~DNA_gyraseA_C~DNA_gyraseA_C~DNA_gyraseA_C~DNA_gyraseA_C~DNA_gyraseA_C                             |
| 101908 | Putative isomerase YbhE                                             | 101908                                               | Lactonase                                                                                                       |
| 101912 | Sema domain                                                         | 101912                                               | Sema                                                                                                            |



|        |                                                                          |                    |                               |
|--------|--------------------------------------------------------------------------|--------------------|-------------------------------|
| 103039 | CheC-like                                                                | 103039             | CheX                          |
| 103054 | General secretion pathway protein M, EpsM                                | 103054             | T2SSM                         |
| 103063 | Hypothetical protein YoaG                                                | 103063             | DUF1869                       |
| 103068 | Nucleocapsid protein dimerization domain                                 | 103068             | Corona_nucleoca               |
| 103084 | Holliday junction resolvase RusA                                         | 103084             | RusA                          |
| 103088 | OmpA-like                                                                | 103088             | OmpA                          |
| 103107 | Hypothetical protein c14orf129, hspc210                                  | 103107             | DUF727                        |
| 103111 | Activator of Hsp90 ATPase, Aha1                                          | 103111~55961       | Aha1_N~AHSA1                  |
| 103145 | Tombusvirus P19 core protein, VP19                                       | 103145             | Tombus_P19                    |
| 103165 | Ta1353-like                                                              | 103165             | Adenosine_kin                 |
| 103190 | Sensory domain-like                                                      | 103190             | Cache_3~SPOB_a~HATPase_c      |
| 103196 | Roadblock/LC7 domain                                                     | 103196             | Robl_LC7                      |
| 103239 | MoaD-related protein, C-terminal domain                                  | 54285~103239       | ThiS~DUF1952                  |
| 103243 | KA1-like                                                                 | 56112~103243       | Pkinase~UBA~KA1               |
| 103247 | TT1751-like                                                              | 103247             | DUF302                        |
| 103256 | Hypothetical protein TM0160                                              | 103256             | DNase-RNase                   |
| 103263 | Chorismate synthase, AroC                                                | 103263             | Chorismate_synt               |
| 103277 | Hypothetical protein HI1480                                              | 52540~103277       |                               |
| 103359 | Suppressor of Fused, N-terminal domain                                   | 103359             | SUFU                          |
| 103365 | Hypothetical protein PH1602                                              | 103365             | RtcB                          |
| 103370 | NinB                                                                     | 103370             | NinB                          |
| 103378 | 2-methylcitrate dehydratase PrpD                                         | 103378             | MmgE_PrpD                     |
| 103383 | Antivirulence factor                                                     | 103383             | AvrB_AvrC                     |
| 103388 | Virulence-associated V antigen                                           | 103388             | LcrV                          |
| 103409 | 39 kda initiator binding protein, IBP39, C-terminal domains              | 46785~103409       | IBD~IBP39                     |
| 103417 | Major capsid protein VP5                                                 | 103417             | Herpes_MCP                    |
| 103431 | Cytochrome f subunit of the cytochrome b6f complex, transmembrane anchor | 49441~51246~103431 | Apocytochr_F_N~Apocytochr_F_C |
| 103436 | PetL subunit of the cytochrome b6f complex                               | 103436             | PetL                          |
| 103441 | PetM subunit of the cytochrome b6f complex                               | 103441             | PetM                          |
| 103446 | PetG subunit of the cytochrome b6f complex                               | 103446             | PetG                          |
| 103451 | PetN subunit of the cytochrome b6f complex                               | 103451             | PetN                          |
| 103456 | Preprotein translocase SecE subunit                                      | 103456             | SecE                          |
| 103460 | Sec-beta subunit                                                         | 103460             | Sec61_beta                    |
| 103464 | Oligosaccharyltransferase subunit ost4p                                  | 103464             | Ost4                          |
| 103473 | MFS general substrate transporter                                        | 103473             | MFS_1                         |
| 103481 | Multidrug resistance efflux transporter EmrE                             | 103481             | Multi_Drug_Res                |
| 103486 | V-type ATP synthase subunit C                                            | 103486             | vATP-synt_AC39                |
| 103491 | Preprotein translocase SecY subunit                                      | 103491~103491      | Plug_translocon~SecY          |
| 103501 | Respiratory nitrate reductase 1 gamma chain                              | 103501             | Nitrate_red_gam               |
| 103506 | Mitochondrial carrier                                                    | 103506             | Mito_carr~Mito_carr~Mito_carr |





|        |                                                                   |                                               |                                               |
|--------|-------------------------------------------------------------------|-----------------------------------------------|-----------------------------------------------|
| 109880 | A middle domain of Talin 1                                        | 47031~50729~109880~109885~109885~47220~109885 | FERM_f0~FERM_N~FERM_M~Talin_middle~VBS~I_LWEQ |
| 109885 | I/LWEQ domain                                                     | 109885                                        | ANTH~I_LWEQ                                   |
| 109905 | Surp module (SWAP domain)                                         | 109905~109905                                 | DRY_EERY~Surp~Surp                            |
| 109910 | YgfY-like                                                         | 109910                                        | Sdh5                                          |
| 109915 | Hypothetical protein YhaI                                         | 109915                                        | DUF1878                                       |
| 109920 | Hypothetical protein At3g22680                                    | 109920                                        | DUF1950                                       |
| 109925 | Lissencephaly-1 protein (Lis-1, PAF-AH alpha) N-terminal domain   | 109925~50978                                  | WD40~WD40~WD40~WD40~WD40~WD40                 |
| 109993 | VPS9 domain                                                       | 109993                                        | VPS9                                          |
| 109998 | Triger factor/SurA peptide-binding domain-like                    | 102735~54534~109998                           | Trigger_N~FKBP_C~Trigger_C                    |
| 110004 | Glycolipid transfer protein, GLTP                                 | 110004                                        | GLTP                                          |
| 110009 | Hypothetical protein MG354                                        | 110009                                        | DUF1951                                       |
| 110014 | Her-1                                                             | 110014                                        | Caenor_Her-1                                  |
| 110019 | ERO1-like                                                         | 110019                                        | ERO1                                          |
| 110035 | GDNF receptor-like                                                | 110035                                        | GDNF~GDNF~GDNF                                |
| 110069 | ApaG-like                                                         | 110069                                        | DUF525                                        |
| 110083 | Peptidylarginine deiminase Pad4, middle domain                    | 49503~110083~55909                            | PAD_N~PAD_M~PAD                               |
| 110087 | DR1885-like metal-binding protein                                 | 110087                                        | DUF461                                        |
| 110111 | Ctag/Cox11                                                        | 110111                                        | CtaG_Cox11                                    |
| 110132 | BTV NS2-like ssRNA-binding domain                                 | 110132                                        | BTV_NS2                                       |
| 110217 | DNA-binding protein LAG-1 (CSL)                                   | 49417~110217~81296                            | LAG1-DNAbind~BTD                              |
| 110221 | AbfB domain                                                       | 49899~110221                                  | ArabFuran-catal~AbfB                          |
| 110296 | Oligoxyloglucan reducing end-specific cellobiohydrolase           | 110296~110296                                 | CBM_2                                         |
| 110304 | Coronavirus RNA-binding domain                                    | 110304~103068                                 | Corona_nucleoca                               |
| 110324 | Ribosomal L27 protein-like                                        | 110324                                        | Ribosomal_L27                                 |
| 110391 | GlpP-like                                                         | 110391                                        | G3P_antiterm                                  |
| 110395 | CutC-like                                                         | 110395                                        | CutC                                          |
| 110399 | ThiG-like                                                         | 110399                                        | ThiG                                          |
| 110455 | Toprim domain                                                     | 110455                                        | Toprim~DUF4093                                |
| 110581 | Indigoidine synthase A-like                                       | 110581                                        | Indigoidine_A                                 |
| 110710 | TTHA0583/YokD-like                                                | 110710                                        | DUF436                                        |
| 110738 | Glycerate kinase I                                                | 110738                                        | Gly_kinase                                    |
| 110783 | Hypothetical protein MTH677                                       | 110783                                        | DUF3194                                       |
| 110814 | TmoB-like                                                         | 110814                                        | TmoB                                          |
| 110836 | Hypothetical protein SAV1430                                      | 110836                                        | Nfu_N~Virulence_fact~HEAT_2~HEAT_2            |
| 110849 | ParB/Sulfiredoxin                                                 | 110849~109709                                 | ParBc                                         |
| 110857 | Gamma-glutamyl cyclotransferase-like                              | 110857                                        | GGACT                                         |
| 110916 | Peptidyl-tRNA hydrolase domain-like                               | 110916                                        | RF-1                                          |
| 110921 | 2-isopropylmalate synthase LeuA, allosteric (dimerisation) domain | 51569~110921                                  | HMGL-like~LeuA_dimer                          |
| 110942 | HSP90 C-terminal domain                                           | 55874~54211~110942                            | HATPase_c~HSP90                               |
| 110993 | eIF-2-alpha, C-terminal domain                                    | 50249~116742~110993                           | S1~EIF_2_alpha                                |
| 110997 | Sporulation related repeat                                        | 110997                                        | SPOR                                          |
| 111006 | Dystroglycan, domain 2                                            | 49313~111006                                  | DAG1                                          |

|        |                                                                |                     |                         |
|--------|----------------------------------------------------------------|---------------------|-------------------------|
| 111038 | YjbQ-like                                                      | 111038              | UPF0047                 |
| 111057 | Hypothetical protein PF0899                                    | 111057              | DUF1884                 |
| 111064 | Hut operon positive regulatory protein HutP                    | 111064              | HutP                    |
| 111069 | Hypothetical protein yfbM                                      | 111069              | DUF1877                 |
| 111074 | Bacillus phage protein                                         | 111074              |                         |
| 111126 | Ligand-binding domain in the NO signalling and Golgi transport | 111126              | TRAPP                   |
| 111148 | YggX-like                                                      | 111148              | Iron_traffic            |
| 111171 | Rbstp2229 protein                                              | 111171              | DUF1885                 |
| 111249 | Sulfolobus fructose-1,6-bisphosphatase-like                    | 111249              | FBPase_3                |
| 111265 | Hemolytic lectin CEL-III, C-terminal domain                    | 50370~50370~111265  | Ricin_B_lectin          |
| 111278 | SSo0622-like                                                   | 111278              | TYW3                    |
| 111283 | Putative modulator of DNA gyrase, PmbA/TldD                    | 111283              | PmbA_TldD               |
| 111304 | Recombination protein RecR                                     | 111304              | RecR~Toprim_4           |
| 111321 | AF1104-like                                                    | 111321              | DUF89                   |
| 111326 | Urocanase                                                      | 111326              | Urocanase               |
| 111331 | NAD kinase/diacylglycerol kinase-like                          | 111331              | NAD_kinase              |
| 111337 | QueA-like                                                      | 111337~111337       | Queuosine_synth         |
| 111342 | CbiD-like                                                      | 111342              | CbiD                    |
| 111347 | Rap/Ran-GAP                                                    | 111347              | Rap_GAP                 |
| 111352 | Ammonium transporter                                           | 111352              | Ammonium_transp         |
| 111357 | Mitochondrial ATP synthase coupling factor 6                   | 111357              | ATP-synt_F6             |
| 111364 | Tsx-like channel                                               | 111364              | Channel_Tsx             |
| 111369 | HlyD-like secretion proteins                                   | 111369              | Biotin_lipoyl_2~HlyD_3  |
| 111379 | VP4 membrane interaction domain                                | 49899~111379        | VP4_haemagglut          |
| 111384 | OmpH-like                                                      | 111384              | OmpH                    |
| 111388 | Pollen allergen ole e 6                                        | 111388              | Ole-e-6                 |
| 111418 | Hormone receptor domain                                        | 111418              | HRM~7tm_2               |
| 111423 | Resistin                                                       | 111423              | Resistin                |
| 111430 | YAP1 redox domain                                              | 111430              | PAP1                    |
| 116726 | TrkA C-terminal domain-like                                    | 116726              | TrkA_N~TrkA_C           |
| 116734 | DNA methylase specificity domain                               | 116734              | Methylase_S~Methylase_S |
| 116738 | NADH pyrophosphatase intervening domain                        | 55811~116738~55811  | zf-NADH-PPase~NUDIX     |
| 116742 | eIF2alpha middle domain-like                                   | 50249~116742~110993 | S1~EIF_2_alpha          |
| 116768 | DNA-binding domain of EIN3-like                                | 116768              | EIN3                    |
| 116820 | Rps17e-like                                                    | 116820              | Ribosomal_S17e          |
| 116842 | XseB-like                                                      | 116842              | Exonuc_VII_S            |
| 116846 | MIT domain                                                     | 116846~52540        | MIT~AAA~Vps4_C          |
| 116854 | Avirulence protein AvrPto                                      | 116854              | AvrPto                  |
| 116858 | Hypothetical membrane protein Ta0354, soluble domain           | 116858              | DUF3198                 |
| 116878 | TrmE connector domain                                          | 103025~116878       | TrmE_N~MnmE_helical     |
| 116907 | Hook domain                                                    | 116907              | HOOK                    |
| 116915 | Hypothetical protein YqbG                                      | 116915              | DUF3199                 |
| 116922 | YugE-like                                                      | 116922              | DUF1871                 |
| 116927 | EspA/CesA-like                                                 | 116927              | EspA                    |

|        |                                                                    |                                                         |                                                                        |
|--------|--------------------------------------------------------------------|---------------------------------------------------------|------------------------------------------------------------------------|
| 116942 | RNA-binding protein She2p                                          | 116942                                                  | She2p                                                                  |
| 116960 | YfbU-like                                                          | 116960                                                  | YfbU                                                                   |
| 116965 | Hypothetical protein MPN330                                        | 116965                                                  | DUF3196                                                                |
| 117018 | ATP-dependent DNA ligase DNA-binding domain                        | 117018~56091~50249                                      | DNA_ligase_A_N~DNA_ligase_A_M~DNA_ligase_A_C                           |
| 117023 | DNA primase DnaG, C-terminal domain                                | 57783~56731~117023                                      | zf-CHC2~Toprim_N~Toprim_4~DnaB_bind~DnaG_DnaB_bind                     |
| 117066 | Accessory protein X4 (ORF8, ORF7a)                                 | 117066                                                  | SARS_X4                                                                |
| 117070 | LEA14-like                                                         | 117070                                                  | LEA_2                                                                  |
| 117074 | Hypothetical protein PA1324                                        | 117074                                                  |                                                                        |
| 117100 | Beta-galactosidase LacA, domain 3                                  | 51445~51011~117100~49785~49785                          | Glyco_hydro_35~BetaGal_dom2~BetaGal_dom3~BetaGal_dom4_5~BetaGal_dom4_5 |
| 117125 | Putative glucosidase YicI, C-terminal domain                       | 74650~51445~51011~117125                                | Gal_mutarotas_2~Glyco_hydro_31                                         |
| 117130 | CsrA-like                                                          | 117130                                                  | CsrA                                                                   |
| 117143 | Flagellar hook protein flgE                                        | 117143                                                  | Flg_bb_rod~FlaE~Flg_bbr_C                                              |
| 117281 | Kelch motif                                                        | 54695~117281                                            | BTB~BACK~Kelch_1~Kelch_1~Kelch_1~Kelch_1~Kelch_1                       |
| 117289 | Nucleoporin domain                                                 | 117289                                                  | Nucleoporin_C                                                          |
| 117396 | TM1631-like                                                        | 117396                                                  | DUF72                                                                  |
| 117457 | FumA C-terminal domain-like                                        | 117457                                                  | Fumerase~Fumerase_C                                                    |
| 117773 | GTF2I-like repeat                                                  | 117773~117773~117773~117773~117773~117773~117773~117773 | GTF2I~GTF2I~GTF2I~GTF2I~GTF2I~GTF2I                                    |
| 117778 | D-lysine 5,6-aminomutase beta subunit KamE, N-terminal domain      | 117778~52242                                            | OAM_dimer~B12-binding                                                  |
| 117782 | YbjQ-like                                                          | 117782                                                  | YbjQ_1                                                                 |
| 117839 | WWE domain                                                         | 117839~56204                                            | WWE~HECT                                                               |
| 117856 | AF0104/ALDC/Ptd012-like                                            | 117856                                                  | AAL_decarboxy                                                          |
| 117892 | Band 7/SPFH domain                                                 | 117892                                                  | Band_7                                                                 |
| 117916 | Fe-S cluster assembly (FSCA) domain-like                           | 117916                                                  | DUF59                                                                  |
| 117987 | CRISPR-associated protein                                          | 117987                                                  | CRISPR_assoc                                                           |
| 117991 | YbeD/HP0495-like                                                   | 117991                                                  | DUF493                                                                 |
| 118001 | YehU-like                                                          | 118001                                                  | UPF0270                                                                |
| 118010 | TM1457-like                                                        | 118010                                                  | Peptidase_C108                                                         |
| 118104 | RalF, C-terminal domain                                            | 48425~118104                                            | Sec7                                                                   |
| 118116 | DNA mismatch repair protein MutL                                   | 55874~54211~118116                                      | HATPase_c_3~DNA_mis_repair~MutL_C                                      |
| 118173 | Phosphoprotein M1, C-terminal domain                               | 118173                                                  | PP_M1                                                                  |
| 118196 | YaeB-like                                                          | 118196                                                  | UPF0066                                                                |
| 118203 | Vacuolar ATP synthase subunit C                                    | 118203                                                  | V-ATPase_C                                                             |
| 118208 | Viral ssDNA binding protein                                        | 118208                                                  | Viral_DNA_bp                                                           |
| 118215 | Proton glutamate symport protein                                   | 118215                                                  | SDF                                                                    |
| 118220 | Connexin43                                                         | 118220                                                  | Connexin~Connexin43                                                    |
| 118251 | Variant surface glycoprotein MITAT 1.2, VSG 221, C-terminal domain | 118251                                                  | Trypan_glycop                                                          |
| 118290 | WRKY DNA-binding domain                                            | 118290                                                  | WRKY                                                                   |
| 118310 | AN1-like Zinc finger                                               | 118310                                                  | zf-A20~zf-AN1                                                          |
| 118352 | HSP33 redox switch-like                                            | 64397~118352                                            | HSP33                                                                  |

|        |                                              |                                                              |                                                                                                                             |
|--------|----------------------------------------------|--------------------------------------------------------------|-----------------------------------------------------------------------------------------------------------------------------|
| 118359 | Expressed protein<br>At2g23090/F21P24.15     | 118359                                                       | 4F5~zf-met2                                                                                                                 |
| 140102 | ISY1 domain-like                             | 140102                                                       | Isy1                                                                                                                        |
| 140106 | Calcyclin-binding protein-like               | 140106~49764                                                 | Siah-Interact_N~CS                                                                                                          |
| 140111 | Endosomal sorting complex<br>assembly domain | 54495~140111                                                 | UEV~Vps23_core                                                                                                              |
| 140121 | SPy1572-like                                 | 140121                                                       | DUF1912                                                                                                                     |
| 140125 | Rabenosyn-5 Rab-binding domain-<br>like      | 140125~140125                                                | FYVE~Rbsn~NPF~Rbsn                                                                                                          |
| 140129 | MxiH-like                                    | 140129                                                       | T3SS_needle_F                                                                                                               |
| 140319 | IscX-like                                    | 140319                                                       | Fe-S_assembly                                                                                                               |
| 140356 | PPK N-terminal domain-like                   | 140356~143724~5602<br>4~56024                                | PP_kinase_N~PP_kinase~PP_kinase<br>_C                                                                                       |
| 140361 | MIT domain-like                              | 140361                                                       | DUF1875                                                                                                                     |
| 140367 | Coronavirus NSP7-like                        | 52949~50494~140367<br>~143076~101816~144<br>246~53335~142877 | Macro~Viral_protease~Corona_NSP<br>4_C~Peptidase_C30~nsp7~nsp8~nsp<br>9~NSP10~Corona_RPol_N~Viral_he<br>licase1~NSP11~NSP13 |
| 140371 | Vng1086c-like                                | 140371                                                       | UPF0058                                                                                                                     |
| 140376 | ChaB-like                                    | 140376                                                       | ChaB                                                                                                                        |
| 140383 | BSD domain-like                              | 140383                                                       | BSD                                                                                                                         |
| 140404 | EF2458-like                                  | 140404                                                       | DUF1507                                                                                                                     |
| 140415 | YppE-like                                    | 140415                                                       | DUF1798                                                                                                                     |
| 140423 | MW0975(SA0943)-like                          | 140423                                                       | YkyA                                                                                                                        |
| 140427 | VPS28 C-terminal domain-like                 | 140111~140427                                                | VPS28                                                                                                                       |
| 140453 | EsxAB dimer-like                             | 140453                                                       | WXG100                                                                                                                      |
| 140459 | PE/PPE dimer-like                            | 140459                                                       | PPE~PE_PPE_C                                                                                                                |
| 140478 | LemA-like                                    | 140478                                                       | LemA                                                                                                                        |
| 140482 | MAST3 pre-PK domain-like                     | 140482~56112~50156                                           | DUF1908~Pkinase                                                                                                             |
| 140486 | PA2201 N-terminal domain-like                | 140486~140731                                                | DUF1911                                                                                                                     |
| 140490 | Nqo1C-terminal domain-like                   | 142019~142984~1404<br>90                                     | Complex1_51K~SLBB~NADH_4Fe<br>-4S                                                                                           |
| 140496 | HP1531-like                                  | 140496                                                       | DUF2443                                                                                                                     |
| 140500 | BAS1536-like                                 | 140500                                                       | SpoOE-like                                                                                                                  |
| 140506 | FHV B2 protein-like                          | 140506                                                       | B2                                                                                                                          |
| 140560 | TM0693-like                                  | 140560                                                       |                                                                                                                             |
| 140566 | FlgN-like                                    | 140566                                                       | FlgN                                                                                                                        |
| 140570 | MukF C-terminal domain-like                  | 46785~140570                                                 | KicB                                                                                                                        |
| 140576 | HIV integrase-binding domain                 | 63748~140576                                                 | PWWP~LEDGF                                                                                                                  |
| 140581 | TraM-like                                    | 47729~140581                                                 | Tra_M                                                                                                                       |
| 140586 | Dcp2 domain-like                             | 140586~55811                                                 | DCP2~NUDIX                                                                                                                  |
| 140591 | Type III secretion system domain             | 140591                                                       | HrpJ                                                                                                                        |
| 140607 | EF2947-like                                  | 140607                                                       | DUF3206                                                                                                                     |
| 140612 | EB1 dimerisation domain-like                 | 47576~140612                                                 | CH~EB1                                                                                                                      |
| 140652 | YozE-like                                    | 140652                                                       | YozE_SAM_like                                                                                                               |
| 140657 | Hyaluronidase post-catalytic domain-<br>like | 55545~51445~140657                                           | Glyco_hydro_20b~NAGidase                                                                                                    |
| 140663 | TTHA0068-like                                | 140663                                                       | DUF309                                                                                                                      |
| 140670 | YoaC-like                                    | 140670                                                       | DUF1889                                                                                                                     |
| 140683 | SP0561-like                                  | 140683                                                       | DUF1858                                                                                                                     |
| 140688 | YfmB-like                                    | 140688                                                       | DUF3212                                                                                                                     |
| 140693 | IpaD-like                                    | 140693                                                       | IpaD                                                                                                                        |
| 140713 | Phage replication organizer domain           | 140713                                                       | Phi-29_GP16_7                                                                                                               |

|        |                                                          |                                               |                                                      |
|--------|----------------------------------------------------------|-----------------------------------------------|------------------------------------------------------|
| 140718 | Mediator hinge subcomplex-like                           | 140718                                        | Med7                                                 |
| 140726 | AF0941-like                                              | 140726                                        | AF0941-like                                          |
| 140731 | PA2201 C-terminal domain-like                            | 140731                                        | DUF1910~DUF1911                                      |
| 140736 | Rv1873-like                                              | 140736                                        | DUF1810                                              |
| 140741 | RUN domain-like                                          | 140741                                        | RUN                                                  |
| 140746 | SipA N-terminal domain-like                              | 140746~101312                                 | SipA                                                 |
| 140753 | PG0816-like                                              | 140753                                        | DUF1896                                              |
| 140804 | YidB-like                                                | 140804                                        | DUF937                                               |
| 140809 | Rhabdovirus nucleoprotein-like                           | 140809                                        | Rhabdo_ncap                                          |
| 140856 | USP8 N-terminal domain-like                              | 140856~52821~54001                            | USP8_dimer~Rhodanese~UCH                             |
| 140860 | Pseudo ankyrin repeat-like                               | 140860                                        |                                                      |
| 140864 | TROVE domain-like                                        | 140864~53300                                  | TROVE                                                |
| 140869 | GUN4-like                                                | 140869                                        | GUN4                                                 |
| 140914 | PriB N-terminal domain-like                              | 140914                                        | DNA_primase_lrg                                      |
| 140919 | DNA terminal protein                                     | 140919                                        | Phi-29_GP3                                           |
| 140924 | Duffy binding domain-like                                | 140924                                        | Duffy_binding                                        |
| 140931 | Fic-like                                                 | 140931                                        | Fic                                                  |
| 140959 | Indolic compounds 2,3-dioxygenase-like                   | 140959                                        | IDO                                                  |
| 140979 | Topoisomerase V catalytic domain-like                    | 140979~47781~47781<br>~47781~47781            | HHH_5~HHH_5                                          |
| 140984 | PTPA-like                                                | 140984                                        | PTPA                                                 |
| 140990 | FtsH protease domain-like                                | 52540~140990                                  | FtsH_ext~AAA~Peptidase_M41                           |
| 140996 | Hermes dimerisation domain                               | 140996~53098                                  | DBD_Tnp_Hermes~Dimer_Tnp_hA<br>T                     |
| 141000 | Glu-tRNAGln amidotransferase C subunit                   | 141000                                        | Glu-tRNAGln                                          |
| 141004 | RelB-like                                                | 141004                                        |                                                      |
| 141066 | ICP-like                                                 | 141066                                        | Inhibitor_I42                                        |
| 141072 | CalX-like                                                | 141072~141072                                 | Na_Ca_ex~Na_Ca_ex_C~Calx-<br>beta~Calx-beta~Na_Ca_ex |
| 141086 | Agglutinin HPA-like                                      | 141086                                        | H_lectin                                             |
| 141091 | L21p-like                                                | 141091                                        | Ribosomal_L21p                                       |
| 141099 | Atu1913-like                                             | 141099                                        | DUF1883                                              |
| 141130 | Acetamidase/Formamidase-like                             | 141130                                        | FmdA_AmdA                                            |
| 141251 | Kinase-associated protein B-like                         | 141251                                        | KapB                                                 |
| 141255 | YccV-like                                                | 141255                                        | YccV-like                                            |
| 141259 | CarD-like                                                | 52540~52540~141259<br>~52540~52540~14351<br>7 | CarD_CdnL_TRCF~DEAD~Helicas<br>e_C~TRCF              |
| 141300 | GatD N-terminal domain-like                              | 141300~53774                                  | Asparaginase                                         |
| 141318 | TM0957-like                                              | 141318                                        | DUF2291                                              |
| 141322 | NfeD domain-like                                         | 141322                                        | NfeD                                                 |
| 141371 | PilZ domain-like                                         | 141371                                        | PilZ                                                 |
| 141447 | PA2021-like                                              | 141447                                        | DUF3203                                              |
| 141452 | Hcp1-like                                                | 141452                                        | T6SS_HCP                                             |
| 141457 | BH3618-like                                              | 141457                                        | FliW                                                 |
| 141480 | Extracellular hemoglobin linker subunit, receptor domain | 57424~141480                                  | Ldl_recept_a~Eryth_link_C                            |
| 141488 | YdhA-like                                                | 141488                                        | MliC                                                 |
| 141493 | Allene oxide cyclase-like                                | 141493                                        | Allene_ox_cyc                                        |
| 141523 | L,D-transpeptidase catalytic domain-like                 | 141523                                        | YkuD                                                 |

|        |                                              |                                                      |                                                                                                                 |
|--------|----------------------------------------------|------------------------------------------------------|-----------------------------------------------------------------------------------------------------------------|
| 141530 | PTSIIA/GutA-like                             | 141530                                               | PTSIIA_gutA                                                                                                     |
| 141562 | At5g01610-like                               | 141562                                               | DUF538                                                                                                          |
| 141571 | Pentapeptide repeat-like                     | 141571                                               | Pentapeptide~Pentapeptide~Pentapeptide~Pentapeptide                                                             |
| 141658 | Bacteriophage trimeric proteins domain       | 141658                                               | Caudo_bapla_RBP                                                                                                 |
| 141666 | 'SARS ORF9b-like                             | 141666                                               | SARS_lipid_bind                                                                                                 |
| 141673 | MOSC N-terminal domain-like                  | 141673                                               | MOSC_N~MOSC                                                                                                     |
| 141678 | MAL13P1.257-like                             | 141678                                               | DUF866                                                                                                          |
| 141694 | AF2212/PG0164-like                           | 141694                                               | DUF1905                                                                                                         |
| 141729 | FimD N-terminal domain-like                  | 141729                                               | PapC_N~Usher~PapC_C                                                                                             |
| 141734 | HisI-like                                    | 141734~101386                                        | PRA-CH                                                                                                          |
| 141739 | MFPT repeat-like                             | 141739~141739                                        | MFP2b                                                                                                           |
| 141868 | EAL domain-like                              | 55785~55073~141868                                   | EAL~YkuI_C                                                                                                      |
| 141986 | LD-carboxypeptidase A C-terminal domain-like | 52317~141986                                         | Peptidase_S66                                                                                                   |
| 142019 | Nqo1 FMN-binding domain-like                 | 142019~142984~140490                                 | Complex1_51K~SLBB~NADH_4Fe-4S                                                                                   |
| 142338 | CofD-like                                    | 142338                                               | UPF0052                                                                                                         |
| 142433 | CinA-like                                    | 142433                                               | CinA                                                                                                            |
| 142535 | AF0625-like                                  | 142535                                               | tRNA_deacylase                                                                                                  |
| 142695 | RibA-like                                    | 55821~142695                                         | DHBP_synthase~GTP_cyclohydro2                                                                                   |
| 142754 | NadA-like                                    | 142754                                               | NadA                                                                                                            |
| 142764 | YgbK-like                                    | 142764                                               | DUF1537~DUF1357_C                                                                                               |
| 142795 | CAC2185-like                                 | 142795                                               | DUF1919                                                                                                         |
| 142823 | ComB-like                                    | 142823                                               | 2-ph_phosp                                                                                                      |
| 142877 | EndoU-like                                   | 142877                                               | XendoU                                                                                                          |
| 142887 | PhtA domain-like                             | 142887~142887~142887                                 | Strep_his_triad~PHtD_u1~Strep_his_triad~Strep_his_triad                                                         |
| 142897 | Tfb5-like                                    | 142897                                               | Tfb5                                                                                                            |
| 142906 | YjbR-like                                    | 142906                                               | YjbR                                                                                                            |
| 142913 | YktB/PF0168-like                             | 142913                                               | DUF1054                                                                                                         |
| 142921 | WGR domain-like                              | 142921~47587~56399                                   | WGR~PARP_reg~PARP                                                                                               |
| 142984 | Nqo1 middle domain-like                      | 142019~142984~140490                                 | Complex1_51K~SLBB~NADH_4Fe-4S                                                                                   |
| 143011 | RelE-like                                    | 143011                                               | YoeB_toxin                                                                                                      |
| 143021 | Ns1 effector domain-like                     | 47060~143021                                         | Flu_NS1                                                                                                         |
| 143026 | Kinetochore globular domain                  | 143026                                               | Spc24                                                                                                           |
| 143034 | L35p-like                                    | 143034                                               | Ribosomal_L35p                                                                                                  |
| 143076 | Coronavirus NSP8-like                        | 52949~50494~140367~143076~101816~144246~53335~142877 | Macro~Viral_protease~Corona_NSP4_C~Peptidase_C30~nsp7~nsp8~nsp9~NSP10~Corona_RPol_N~Viral_helicase1~NSP11~NSP13 |
| 143081 | BB1717-like                                  | 143081                                               | SRAP                                                                                                            |
| 143100 | TTHA1013/TTHA0281-like                       | 143100                                               | DUF1902                                                                                                         |
| 143113 | NAP-like                                     | 143113                                               | NAP                                                                                                             |
| 143120 | YefM-like                                    | 143120                                               | PhdYeFM_antitox                                                                                                 |
| 143212 | Rv2632c-like                                 | 143212                                               | DUF1876                                                                                                         |
| 143243 | Nqo5-like                                    | 143243                                               | Complex1_30kDa                                                                                                  |
| 143410 | DOPA-like                                    | 143410                                               | DOPA_dioxygen                                                                                                   |
| 143414 | CcmK-like                                    | 143414                                               | BMC                                                                                                             |
| 143422 | Transposase IS200-like                       | 143422                                               | Y1_Tnp                                                                                                          |
| 143430 | TTP0101/SSO1404-like                         | 143430                                               | CRISPR_Cas2                                                                                                     |

|        |                                                          |                                           |                                     |
|--------|----------------------------------------------------------|-------------------------------------------|-------------------------------------|
| 143437 | THUMP domain-like                                        | 143437~52402                              | THUMP~ThiI                          |
| 143447 | AMMECR1-like                                             | 143447                                    | AMMECR1                             |
| 143456 | VC0467-like                                              | 143456                                    | DUF179                              |
| 143469 | ImmE5-like                                               | 143469                                    | ImmE5                               |
| 143477 | TM1622-like                                              | 143477                                    | DUF3242                             |
| 143492 | Prenyltransferase-like                                   | 143492                                    | PTase_Orf2                          |
| 143503 | PUG domain-like                                          | 143503~54001~49785                        | PUB~Transglut_core~PAW              |
| 143517 | TRCF domain-like                                         | 52540~52540~141259<br>~52540~52540~143517 | CarD_CdnL_TRCF~DEAD~Helicase_C~TRCF |
| 143548 | Serine metabolism enzymes domain                         | 143548                                    | SDH_beta~SDH_alpha                  |
| 143555 | FwdE-like                                                | 143555                                    | FmdE~zf-dskA_traR                   |
| 143560 | MK0786-like                                              | 143560                                    | DHNA                                |
| 143567 | YkuJ-like                                                | 143567                                    | DUF1797                             |
| 143575 | GAS2 domain-like                                         | 143575                                    | CH~GAS2                             |
| 143579 | GK1464-like                                              | 143579                                    |                                     |
| 143587 | SARS receptor-binding domain-like                        | 143587                                    | Spike_rec_bind~Corona_S2            |
| 143592 | TTHA1528-like                                            | 143592                                    | DUF3197                             |
| 143597 | YojJ-like                                                | 143597                                    | YojJ~DisA_N                         |
| 143602 | STIV B116-like                                           | 143602                                    | DUF1874                             |
| 143631 | ApbE-like                                                | 143631                                    | ApbE                                |
| 143724 | PHP14-like                                               | 140356~143724~56024~56024                 | PP_kinase_N~PP_kinase~PP_kinase_C   |
| 143737 | YeeU-like                                                | 143737                                    | CbeA_antitoxin                      |
| 143744 | GlcG-like                                                | 143744                                    | Haem_degrading                      |
| 143749 | Phage tail protein-like                                  | 143749                                    | Phage_tail_U                        |
| 143791 | DUSP-like                                                | 143791                                    | DUSP~Ubiquitin_3~UCH                |
| 143800 | L28p-like                                                | 143800                                    | Ribosomal_L28                       |
| 143842 | YwmB-like                                                | 143842                                    | DUF1779                             |
| 143847 | XisI-like                                                | 143847                                    | XisI                                |
| 143856 | DeoB insert domain-like                                  | 143856                                    | Metalloenzyme                       |
| 143865 | CorA soluble domain-like                                 | 143865                                    | CorA                                |
| 143870 | PF0523-like                                              | 143870                                    | CGI-121                             |
| 143875 | ERH-like                                                 | 143875                                    | ER                                  |
| 143880 | NE0471 N-terminal domain-like                            | 143880~47413                              | DUF2442                             |
| 143885 | RGC domain-like                                          | 47576~143885                              | CH~IQ~IQ~IQ~IQ~RasGAP~RasGAP_C      |
| 143968 | UbiD C-terminal domain-like                              | 143968                                    | UbiD                                |
| 143975 | IlvD/EDD N-terminal domain-like                          | 143975~52016                              | ILVD_EDD                            |
| 143985 | L,D-transpeptidase pre-catalytic domain-like             | 143985~141523                             | PG_binding_4~PG_binding_4~YkuD      |
| 143990 | YbiA-like                                                | 143990                                    | DUF1768                             |
| 143995 | AF2331-like                                              | 143995                                    | AF2331-like                         |
| 144000 | Oxysterol-binding protein-like                           | 144000                                    | PH~Oxysterol_BP                     |
| 144005 | ORC1-binding domain                                      | 144005                                    | Sir1~Sir1                           |
| 144010 | CofE-like                                                | 144010                                    | F420_ligase                         |
| 144015 | Peptidoglycan deacetylase N-terminal noncatalytic region | 144015~88713                              | Polysacc_deac_1                     |
| 144020 | FdhE-like                                                | 144020                                    | FdhE                                |
| 144052 | Thermophilic metalloprotease-like                        | 144052                                    | Peptidase_M29                       |
| 144059 | ImpE-like                                                | 144059                                    | ImpE                                |
| 144064 | Heme iron utilization protein-like                       | 144064                                    | HemS~HemS                           |
| 144074 | E2F-DP heterodimerization region                         | 46785~144074                              | E2F_TDP~E2F_CC-MB                   |

|        |                                                        |                                                      |                                                                                                                 |
|--------|--------------------------------------------------------|------------------------------------------------------|-----------------------------------------------------------------------------------------------------------------|
| 144083 | Magnesium transport protein CorA, transmembrane region | 144083                                               | CorA                                                                                                            |
| 144091 | Rhomboid-like                                          | 144091                                               | Rhomboid                                                                                                        |
| 144122 | Tim10-like                                             | 144122                                               | zf-Tim10_DDP                                                                                                    |
| 144129 | Vanabin-like                                           | 144129                                               | Vanabin-2                                                                                                       |
| 144206 | NOB1 zinc finger-like                                  | 144206                                               | NOB1_Zn_bind                                                                                                    |
| 144210 | Nop10-like SnoRNP                                      | 144210                                               | Nop10p                                                                                                          |
| 144217 | CSL zinc finger                                        | 144217                                               | zf-CSL                                                                                                          |
| 144232 | HIT/MYND zinc finger-like                              | 144232                                               | zf-MYND                                                                                                         |
| 144246 | Coronavirus NSP10-like                                 | 52949~50494~140367~143076~101816~144246~53335~142877 | Macro~Viral_protease~Corona_NSP4_C~Peptidase_C30~nsp7~nsp8~nsp9~NSP10~Corona_RPol_N~Viral_helicase1~NSP11~NSP13 |
| 144251 | Viral leader polypeptide zinc finger                   | 144251~88633~88633~88633~50494~56672                 | VP_N-CPKC~Rhv~Rhv~RNA_helicase~Peptidase_C3~RdRP_1                                                              |
| 144256 | TSP9-like                                              | 144256                                               | TSP9                                                                                                            |
| 158212 | Htr2 transmembrane domain-like                         | 158212                                               | HAMP~MCPsignal                                                                                                  |
| 158221 | YnzC-like                                              | 158221                                               | DUF896                                                                                                          |
| 158230 | PRP4-like                                              | 158230                                               | PRP4~Prp18                                                                                                      |
| 158235 | SOCS box-like                                          | 55550~158235                                         | SH2~SOCS_box                                                                                                    |
| 158366 | Efb C-domain-like                                      | 158366                                               | efb-c                                                                                                           |
| 158372 | AF1782-like                                            | 158372                                               | DUF357                                                                                                          |
| 158379 | YqgQ-like                                              | 158379                                               | DUF910                                                                                                          |
| 158388 | YvfG-like                                              | 158388                                               | YvfG                                                                                                            |
| 158397 | TM1646-like                                            | 158397                                               | DUF327                                                                                                          |
| 158414 | HP0062-like                                            | 158414                                               | WXG100                                                                                                          |
| 158418 | SO2669-like                                            | 158418                                               |                                                                                                                 |
| 158430 | Bacillus cereus metalloprotein-like                    | 158430~158430                                        | DUF2935~DUF2935                                                                                                 |
| 158436 | Ta0600-like                                            | 158436                                               | UPF0147                                                                                                         |
| 158442 | DsbB-like                                              | 158442                                               | DsbB                                                                                                            |
| 158446 | IVS-encoded protein-like                               | 158446                                               | 23S_rRNA_IVP                                                                                                    |
| 158452 | YqcC-like                                              | 158452                                               | DUF446                                                                                                          |
| 158457 | Orange domain-like                                     | 158457                                               | HLH~Hairy_orange                                                                                                |
| 158472 | HAMP domain-like                                       | 158472                                               | HAMP~HisKA~HATPase_c                                                                                            |
| 158494 | PG0775 C-terminal domain-like                          | 56645~47203~158494                                   | Acyl-CoA_dh_N~Acyl-CoA_dh_M~Acyl-CoA_dh_1~AcylCoA_dehyd_C                                                       |
| 158499 | DnaD domain-like                                       | 158499                                               | DnaB_2                                                                                                          |
| 158504 | BH2638-like                                            | 158504                                               | UPF0223                                                                                                         |
| 158544 | GspK insert domain-like                                | 158544                                               | T2SSK                                                                                                           |
| 158548 | FLJ32549 domain-like                                   | 158548~160651                                        | DUF2003                                                                                                         |
| 158553 | TAFH domain-like                                       | 158553~144232                                        | TAFH~NHR2~zf-MYND                                                                                               |
| 158560 | BH3980-like                                            | 158560                                               | DUF1048                                                                                                         |
| 158568 | AF1862-like                                            | 158568                                               | Cas_Cmr5                                                                                                        |
| 158573 | GIN5 helical bundle-like                               | 158573                                               | Sld5                                                                                                            |
| 158587 | Jann4075-like                                          | 158587                                               | DUF2853                                                                                                         |
| 158615 | RbcX-like                                              | 158615                                               | RcbX                                                                                                            |
| 158622 | YheA/YmcA-like                                         | 158622                                               | Com_YlbF                                                                                                        |
| 158634 | RPA2825-like                                           | 158634                                               | DUF3597                                                                                                         |
| 158639 | ENT-like                                               | 158639                                               | ENT                                                                                                             |
| 158651 | YejL-like                                              | 158651                                               | DUF1414                                                                                                         |
| 158668 | MtlR-like                                              | 158668                                               | MtlR                                                                                                            |



|        |                                                                                                    |                                     |                                      |
|--------|----------------------------------------------------------------------------------------------------|-------------------------------------|--------------------------------------|
| 158675 | Sama2622-like                                                                                      | 158675                              | DUF3069                              |
| 158682 | TerB-like                                                                                          | 158682                              | TerB                                 |
| 158694 | UraD-Like                                                                                          | 158694                              | OHCU_decarbox                        |
| 158702 | Sec63 N-terminal domain-like                                                                       | 52540~52540~158702<br>~158702~81296 | DEAD~Helicase_C~Sec63~DEAD~<br>Sec63 |
| 158710 | PSPTO4464-like                                                                                     | 158710                              | DUF615                               |
| 158715 | Mg296-like                                                                                         | 158715                              | Mg296                                |
| 158745 | LanC-like                                                                                          | 158745                              | LANC_like                            |
| 158752 | HP0242-like                                                                                        | 158752                              | DUF2018                              |
| 158757 | SMc04008-like                                                                                      | 158757                              | DUF1244                              |
| 158791 | MgtE N-terminal domain-like                                                                        | 158791~54631~16109<br>3             | MgtE_N~CBS~CBS~MgtE                  |
| 158832 | Tex N-terminal region-like                                                                         | 158832~53098~47781<br>~47781~50249  | Tex_N~Tex_YqgF~HHH_3~S1              |
| 158837 | AGR C 984p-like                                                                                    | 158837                              | DUF1217                              |
| 158842 | PMT central region-like                                                                            | 158842~159501~5400<br>1             | PMT_C                                |
| 158851 | Lag-3 N-terminal region                                                                            | 158851                              | Activator_LAG-3                      |
| 158855 | Lipase chaperone-like                                                                              | 158855                              | Lipase_chap                          |
| 158911 | NEAT domain-like                                                                                   | 158911                              | NEAT                                 |
| 158949 | Smr-associated domain-like                                                                         | 158949                              | DUF2027~Smr                          |
| 158974 | WSSV envelope protein-like                                                                         | 158974                              | WSS_VP                               |
| 158997 | Trm112p-like                                                                                       | 158997                              | Trm112p                              |
| 159006 | YopX-like                                                                                          | 159006                              | YopX                                 |
| 159034 | Mib/herc2 domain-like                                                                              | 159034~159034~4840<br>3             | Ank_5~Sad1_UNC~MIB_HERC2~<br>HECT    |
| 159038 | YorP-like                                                                                          | 159038                              | YorP                                 |
| 159042 | Plus3-like                                                                                         | 159042                              | Plus-3                               |
| 159065 | Dom34/Pelota N-terminal domain-<br>like                                                            | 159065~53137~55315                  | eRF1_1~eRF1_2~eRF1_3                 |
| 159071 | TrmB C-terminal domain-like                                                                        | 159071                              | TrmB~Regulator_TrkB                  |
| 159121 | BC4932-like                                                                                        | 159121                              | DUF1093                              |
| 159127 | HupF/HypC-like                                                                                     | 159127                              | HupF_HypC                            |
| 159133 | EutN/CcmL-like                                                                                     | 159133                              | EutN_CcmL                            |
| 159141 | HIN-2000 domain-like                                                                               | 159141~159141                       | PYRIN~HIN                            |
| 159173 | YkvR-like                                                                                          | 159173                              | DUF3219                              |
| 159203 | NifT/FixU-like                                                                                     | 159203                              | NifT                                 |
| 159222 | YopT-like                                                                                          | 159222                              | Yopt                                 |
| 159234 | FomD-like                                                                                          | 159234                              | DUF402                               |
| 159238 | SO1590-like                                                                                        | 159238                              | DUF3224                              |
| 159245 | AttH-like                                                                                          | 159245                              | CrtC                                 |
| 159270 | YmcC-like                                                                                          | 159270                              | YjbF                                 |
| 159275 | PA1994-like                                                                                        | 159275                              | Glycolipid_bind                      |
| 159283 | Guanosine diphospho-D-mannose<br>pyrophosphorylase/mannose-6-<br>phosphate isomerase linker domain | 53448~159283                        | NTP_transferase~MannoseP_isomer      |
| 159468 | AtpF-like                                                                                          | 159468                              | ATP-synt_F                           |
| 159501 | EreA/ChaN-like                                                                                     | 159501                              | Erythro_esteras                      |
| 159594 | XCC0632-like                                                                                       | 159594                              | ABC_trans_aux                        |
| 159612 | TBP-interacting protein-like                                                                       | 159612                              | TBPIP_N                              |
| 159659 | Cgl1923-like                                                                                       | 159659                              | PAC2                                 |
| 159664 | CobE/GbiG C-terminal domain-like                                                                   | 159664                              | CbiG_C                               |
| 159672 | CbiG N-terminal domain-like                                                                        | 159672~159664                       | CbiG_N~CbiG_C                        |

|        |                                               |                                                                                |                                                                                                                                                                        |
|--------|-----------------------------------------------|--------------------------------------------------------------------------------|------------------------------------------------------------------------------------------------------------------------------------------------------------------------|
| 159709 | PhnH-like                                     | 159709                                                                         | PhnH                                                                                                                                                                   |
| 159713 | Dhaf3308-like                                 | 159713                                                                         | DUF4213~DUF364                                                                                                                                                         |
| 159774 | YerB-like                                     | 159774                                                                         | DUF3048                                                                                                                                                                |
| 159779 | CdCA1 repeat-like                             | 159779                                                                         |                                                                                                                                                                        |
| 159800 | PrpR receptor domain-like                     | 159800~52540                                                                   | PrpR_N~Sigma54_activat                                                                                                                                                 |
| 159865 | XkdW-like                                     | 159865                                                                         | XkdW                                                                                                                                                                   |
| 159871 | YdgH-like                                     | 159871                                                                         | DUF1471                                                                                                                                                                |
| 159888 | YdhG-like                                     | 159888                                                                         | DUF1801                                                                                                                                                                |
| 159894 | YgaC/TfoX-N like                              | 159894                                                                         | TfoX_N~TfoX_C                                                                                                                                                          |
| 159902 | PH1570-like                                   | 159902                                                                         | Ph1570                                                                                                                                                                 |
| 159936 | NSP3A-like                                    | 159936~52949~50494<br>~140367~143076~101<br>816~144246~53335~1<br>42877        | DUF3477~Peptidase_C16~Macro~V<br>iral_protease~NAR~Corona_NSP4_<br>C~Peptidase_C30~nsp7~nsp8~nsp9~<br>NSP10~Corona_RPol_N~AAA_12~<br>NSP11~NSP13                       |
| 159941 | MM3350-like                                   | 159941                                                                         | PRiA4_ORF3                                                                                                                                                             |
| 160059 | PriA/YqbF domain                              | 160059~158573                                                                  | Sld5                                                                                                                                                                   |
| 160088 | NRDP1 C-terminal domain-like                  | 57850~160088                                                                   | zf-C3HC4~USP8_interact                                                                                                                                                 |
| 160099 | SARS Nsp1-like                                | 160099~159936~5294<br>9~50494~140367~143<br>076~101816~144246~<br>53335~142877 | Nsp1~DUF3655~Macro~SUD-<br>M~Nsp3_PL2pro~Viral_protease~N<br>AR~Corona_NSP4_C~Peptidase_C3<br>0~nsp7~nsp8~nsp9~NSP10~Corona<br>_RPol_N~Viral_helicase1~NSP11~<br>NSP13 |
| 160104 | Acetoacetate decarboxylase-like               | 160104                                                                         | ADC                                                                                                                                                                    |
| 160113 | YegP-like                                     | 160113~160113                                                                  | DUF1508~DUF1508                                                                                                                                                        |
| 160148 | CPE0013-like                                  | 160148                                                                         | DUF1667                                                                                                                                                                |
| 160191 | YcgL-like                                     | 160191                                                                         | YcgL                                                                                                                                                                   |
| 160207 | NMB0488-like                                  | 160207                                                                         | DUF1436                                                                                                                                                                |
| 160214 | FlaG-like                                     | 160214                                                                         | FlaG                                                                                                                                                                   |
| 160219 | AMPKBI-like                                   | 81296~160219                                                                   | AMPK1_CBM~AMPKBI                                                                                                                                                       |
| 160240 | Cation efflux protein cytoplasmic domain-like | 161111~160240                                                                  | Cation_efflux~ZT_dimer                                                                                                                                                 |
| 160246 | EspE N-terminal domain-like                   | 160246~52540                                                                   | T2SSE_N~T2SSE                                                                                                                                                          |
| 160272 | Shew3726-like                                 | 160272                                                                         | DUF1488                                                                                                                                                                |
| 160350 | Rnp2-like                                     | 160350                                                                         | RNase_P_Rpp14                                                                                                                                                          |
| 160355 | Bacterial polysaccharide co-polymerase-like   | 160355                                                                         | Wzz                                                                                                                                                                    |
| 160363 | MTH889-like                                   | 160363                                                                         | DUF211                                                                                                                                                                 |
| 160369 | Ribosomal protein L10-like                    | 160369                                                                         | Ribosomal_L10                                                                                                                                                          |
| 160374 | RplX-like                                     | 160374                                                                         | Ribosomal_L18ae                                                                                                                                                        |
| 160379 | SP0830-like                                   | 160379                                                                         | DUF1697                                                                                                                                                                |
| 160387 | NosL/MerB-like                                | 160387                                                                         | NosL                                                                                                                                                                   |
| 160419 | YdfO-like                                     | 160419                                                                         | DUF1398                                                                                                                                                                |
| 160424 | BH3703-like                                   | 160424                                                                         | DUF600                                                                                                                                                                 |
| 160443 | SMR domain-like                               | 160443                                                                         | DUF1771~Smr                                                                                                                                                            |
| 160448 | PG1857-like                                   | 160448                                                                         | DUF2023                                                                                                                                                                |
| 160453 | PB2 C-terminal domain-like                    | 160453                                                                         | Flu_PB2                                                                                                                                                                |
| 160459 | BLRF2-like                                    | 160459                                                                         | Herpes_BLRF2                                                                                                                                                           |
| 160467 | PH0987 N-terminal domain-like                 | 160467~50891                                                                   | AHS1                                                                                                                                                                   |
| 160472 | NMB0513-like                                  | 160472                                                                         | DUF596                                                                                                                                                                 |
| 160477 | PA1123-like                                   | 160477                                                                         | DUF2025                                                                                                                                                                |
| 160481 | BRK domain-like                               | 52540~52540~160481<br>~160481                                                  | Chromo~Chromo~SNF2_N~Helicas<br>e_C~BRK~BRK                                                                                                                            |

|        |                                                |               |                                               |
|--------|------------------------------------------------|---------------|-----------------------------------------------|
| 160515 | YueI-like                                      | 160515        | DUF1694                                       |
| 160519 | BB2672-like                                    | 160519        | AA_synth                                      |
| 160527 | V-type ATPase subunit E-like                   | 160527        | vATP-synt_E                                   |
| 160532 | Ava3019-like                                   | 160532        | DUF1824                                       |
| 160537 | SpoVG-like                                     | 160537        | SpoVG                                         |
| 160544 | EscU C-terminal domain-like                    | 160544        | Bac_export_2                                  |
| 160570 | YonK-like                                      | 160570        | YonK                                          |
| 160574 | BT0923-like                                    | 160574        | PepSY_like                                    |
| 160582 | MbtH-like                                      | 160582        | MbtH                                          |
| 160631 | SMI1/KNR4-like                                 | 160631        | SUKH_6                                        |
| 160651 | FLJ32549 C-terminal domain-like                | 158548~160651 | DUF2003                                       |
| 160683 | YNR034W-A-like                                 | 160683        | DUF3215                                       |
| 160696 | BTG domain-like                                | 160696        | BTG                                           |
| 160704 | YehR-like                                      | 160704        | DUF1307                                       |
| 160713 | YqaI-like                                      | 160713        | Yqai                                          |
| 160719 | gpW/gp25-like                                  | 160719        | GPW_gp25                                      |
| 160755 | YugN-like                                      | 160755        | YugN                                          |
| 160761 | TTHC002-like                                   | 160761        |                                               |
| 160766 | NE1680-like                                    | 160766        | DUF2024                                       |
| 160800 | Lp2179-like                                    | 160800        | DUF1831                                       |
| 160887 | Rv2827c C-terminal domain-like                 | 46785~160887  | AbiEi_1                                       |
| 160892 | Phosphoprotein oligomerization domain-like     | 160892        | Phosphoprotein                                |
| 160897 | Taf5 N-terminal domain-like                    | 160897~50978  | TFIID_NTD2~WD40~WD40~WD40~WD40~WD40           |
| 160904 | Jann2411-like                                  | 160904        | ABATE~zf-CGNR                                 |
| 160909 | ATP12-like                                     | 160909        | ATP12                                         |
| 160920 | PSTPO5379-like                                 | 160920        | DUF1445                                       |
| 160925 | PG1388-like                                    | 160925        | DUF3256                                       |
| 160930 | FlhC-like                                      | 160930        | FlhC                                          |
| 160935 | VPA0735-like                                   | 160935        | DUF1254~DUF1214                               |
| 160940 | Api92-like                                     | 160940        | DUF1281                                       |
| 160945 | PH0156-like                                    | 160945        | DUF3226                                       |
| 160950 | YacF-like                                      | 160950        | DUF1342                                       |
| 160957 | Poly(A) polymerase catalytic subunit-like      | 160957        | Pox_polyA_pol_N~Pox_polyA_pol~Pox_polyA_pol_C |
| 160964 | MalF N-terminal region-like                    | 160964~161098 | MalF_P2~BPD_transp_1                          |
| 160975 | AF1531-like                                    | 160975        | DUF655                                        |
| 160980 | SSO1389-like                                   | 160980        | Cas_DxTHG                                     |
| 160991 | CV3147-like                                    | 160991        | DUF917                                        |
| 160996 | HI0933 insert domain-like                      | 51905~160996  | HI0933_like                                   |
| 161003 | flu NP-like                                    | 161003        | Flu_NP                                        |
| 161008 | Viral glycoprotein ectodomain-like             | 161008        | Rhabdo_glycop                                 |
| 161017 | Photosystem II reaction center protein L, PsbL | 161017        | PsbL                                          |
| 161021 | Photosystem II reaction center protein J, PsbJ | 161021        | PsbJ                                          |
| 161025 | Photosystem II 10 kDa phosphoprotein PsbH      | 161025        | PsbH                                          |
| 161029 | Photosystem II reaction center protein T, PsbT | 161029        | PsbT                                          |
| 161033 | Photosystem II reaction center protein M, PsbM | 161033        | PsbM                                          |

|        |                                                 |                     |                                |
|--------|-------------------------------------------------|---------------------|--------------------------------|
| 161037 | Photosystem II reaction center protein K, PsbK  | 161037              | PsbK                           |
| 161041 | Photosystem II reaction center protein I, PsbI  | 161041              | PsbI                           |
| 161045 | Cytochrome b559 subunits                        | 161045              | Cytochrom_B559~Cytochrom_B559a |
| 161055 | PsbZ-like                                       | 161055              | Ycf9                           |
| 161060 | ATP synthase B chain-like                       | 161060              | Mt_ATP-synt_B                  |
| 161065 | ATP synthase D chain-like                       | 161065              | Mt_ATP-synt_D                  |
| 161070 | SNF-like                                        | 161070              | SNF                            |
| 161077 | Photosystem II antenna protein-like             | 161077              | PSII                           |
| 161084 | MAPEG domain-like                               | 161084              | MAPEG                          |
| 161093 | MgtE membrane domain-like                       | 158791~54631~161093 | MgtE_N~CBS~CBS~MgtE            |
| 161098 | MetI-like                                       | 161098              | BPD_transp_1                   |
| 161111 | Cation efflux protein transmembrane domain-like | 161111~160240       | Cation_efflux~ZT_dimer         |
| 161148 | VhTI-like                                       | 161148              |                                |
| 161187 | YfgJ-like                                       | 161187              | zinc-ribbons_6                 |
| 161219 | CHY zinc finger-like                            | 161219~161245       | zf-CHY~zf-RING_2~zinc_ribbon_6 |
| 161229 | E6 C-terminal domain-like                       | 161229              | E6                             |
| 161234 | E7 C-terminal domain-like                       | 161234              | E7                             |
| 161240 | T-antigen specific domain-like                  | 46565~161240        | Papo_T_antigen                 |
| 161245 | Zinc hairpin stack                              | 161219~161245       | zf-CHY~zf-RING_2~zinc_ribbon_6 |

**Supplementary Table 13:** A list of all the superfamilies which have more than 100 gene products with putatively discontinuous domains along with the class and fold details. The domains with more than 25 residue breaks have been referred to as discontinuous domains. The interrupted domains which have been listed in SCOP have been highlighted in a green background. Discontinuous domains refer to domain match instances with a break of 25 residues or more in the hmm matches. Instances of domain matches with breaks less than 25 residues are listed under the column SCOP hmm breaks. The column “Total interrupted domains” refers to number of sequences with hmm breaks in the superfamily.

| SCOP Class | SCOP Fold | SCOP Sf | Description                                               | #GI    | #discontinuous SCOP domains | #SCOP hmm breaks | Total interrupted domains |
|------------|-----------|---------|-----------------------------------------------------------|--------|-----------------------------|------------------|---------------------------|
| 46456      | 46457     | 46458   | Globin-like                                               | 22203  | 114                         | 17               | 121                       |
| 46456      | 46625     | 46626   | Cytochrome c                                              | 37850  | 9                           | 353              | 32                        |
| 46456      | 46688     | 46785   | Winged helix DNA-binding domain                           | 300000 | 14                          | 272              | 59                        |
| 46456      | 47363     | 47203   | Acyl-CoA dehydrogenase C-terminal domain-like             | 34517  | 2                           | 100              | 22                        |
| 46456      | 47161     | 47216   | Proteasome activator                                      | 764    | 149                         | 216              | 168                       |
| 46456      | 47239     | 47240   | Ferritin-like                                             | 49804  | 619                         | 826              | 892                       |
| 46456      | 47265     | 47266   | 4-helical cytokines                                       | 9157   | 10                          | 170              | 19                        |
| 46456      | 47458     | 47459   | HLH, helix-loop-helix DNA-binding domain                  | 15534  | 3                           | 164              | 109                       |
| 46456      | 47472     | 47473   | EF-hand                                                   | 56632  | 503                         | 580              | 575                       |
| 46456      | 47575     | 47576   | Calponin-homology domain, CH-domain                       | 18473  | 4                           | 148              | 5                         |
| 46456      | 47615     | 47616   | GST C-terminal domain-like                                | 46546  | 3                           | 102              | 5                         |
| 46456      | 47768     | 47781   | RuvA domain 2-like                                        | 36409  | 87                          | 579              | 94                        |
| 46456      | 47861     | 47862   | Saposin                                                   | 1936   | 2                           | 399              | 25                        |
| 46456      | 47911     | 47912   | Wiscott-Aldrich syndrome protein, WASP, C-terminal domain | 232    | 213                         | 6                | 214                       |
| 46456      | 47916     | 47923   | Ypt/Rab-GAP domain of gyp1p                               | 2255   | 28                          | 158              | 34                        |
| 46456      | 47953     | 47954   | Cyclin-like                                               | 17027  | 1                           | 228              | 38                        |
| 46456      | 48007     | 48008   | GntR ligand-binding domain-like                           | 5048   | 3                           | 111              | 12                        |
| 46456      | 48112     | 48113   | Heme-dependent peroxidases                                | 16717  | 119                         | 445              | 299                       |
| 46456      | 48207     | 48208   | Six-hairpin glycosidases                                  | 31846  | 68                          | 232              | 72                        |
| 46456      | 48207     | 48225   | Seven-hairpin glycosidases                                | 4216   | 94                          | 119              | 97                        |
| 46456      | 48207     | 48239   | Terpenoid cyclases/Protein prenyltransferases             | 13588  | 331                         | 254              | 344                       |
| 46456      | 48263     | 48264   | Cytochrome P450                                           | 43685  | 65                          | 687              | 128                       |
| 46456      | 48344     | 48345   | A virus capsid protein alpha-helical domain               | 1055   | 989                         | 0                | 989                       |
| 46456      | 48349     | 48350   | GTPase activation domain, GAP                             | 15107  | 14                          | 1019             | 183                       |
| 46456      | 48370     | 48371   | ARM repeat                                                | 46755  | 627                         | 3967             | 724                       |
| 53931      | 74651     | 48403   | Ankyrin repeat                                            | 10411  | 38                          | 2490             | 124                       |
| 46456      | 48370     | 48452   | TPR-like                                                  | 31956  | 13                          | 692              | 88                        |
| 46456      | 48507     | 48508   | Nuclear receptor ligand-binding domain                    | 15326  | 91                          | 171              | 116                       |
| 46456      | 48591     | 48592   | GroEL equatorial domain-like                              | 3393   | 2909                        | 2                | 2910                      |
| 46456      | 48694     | 48695   | Multiheme cytochromes                                     | 4852   | 0                           | 112              | 2                         |
| 48724      | 48725     | 48726   | Immunoglobulin                                            | 200000 | 18                          | 221              | 113                       |
| 48724      | 48725     | 49265   | Fibronectin type III                                      | 54163  | 523                         | 81               | 531                       |
| 48724      | 49379     | 49417   | p53-like transcription factors                            | 14329  | 23                          | 129              | 25                        |
| 48724      | 49492     | 49493   | HSP40/DnaJ peptide-binding domain                         | 17814  | 115                         | 196              | 123                       |
| 48724      | 49502     | 49503   | Cupredoxins                                               | 55723  | 72                          | 658              | 137                       |
| 48724      | 49561     | 49562   | C2 domain (Calcium/lipid-binding domain, CaLB)            | 37948  | 23                          | 152              | 43                        |
| 48724      | 49757     | 49758   | Calpain large subunit, middle domain (domain III)         | 3698   | 4                           | 108              | 7                         |
| 48724      | 49784     | 49785   | Galactose-binding domain-like                             | 50161  | 45                          | 299              | 90                        |
| 48724      | 49878     | 49879   | SMAD/FHA domain                                           | 21383  | 14                          | 317              | 19                        |
| 48724      | 49898     | 49899   | Concanavalin A-like lectins/glucanases                    | 55607  | 126                         | 419              | 198                       |

|       |       |       |                                                       |        |       |       |       |
|-------|-------|-------|-------------------------------------------------------|--------|-------|-------|-------|
| 48724 | 50128 | 50129 | GroES-like                                            | 87332  | 2002  | 21    | 2009  |
| 48724 | 50181 | 50182 | Sm-like ribonucleoproteins                            | 22421  | 4     | 198   | 10    |
| 48724 | 50198 | 50249 | Nucleic acid-binding proteins                         | 200000 | 46    | 390   | 80    |
| 48724 | 50493 | 50494 | Trypsin-like serine proteases                         | 69184  | 160   | 727   | 275   |
| 48724 | 50629 | 50630 | Acid proteases                                        | 33784  | 442   | 332   | 488   |
| 48724 | 50728 | 50729 | PH domain-like                                        | 94233  | 168   | 619   | 213   |
| 48724 | 50890 | 50891 | Cyclophilin-like                                      | 22143  | 1     | 607   | 266   |
| 48724 | 50938 | 50939 | Sialidases                                            | 16625  | 158   | 145   | 165   |
| 48724 | 50964 | 50978 | WD40 repeat-like                                      | 18251  | 105   | 2466  | 144   |
| 48724 | 51125 | 51126 | Pectin lyase-like                                     | 20582  | 135   | 548   | 171   |
| 48724 | 51160 | 51161 | Trimeric LpxA-like enzymes                            | 40854  | 1     | 570   | 17    |
| 48724 | 51181 | 51182 | RmlC-like cupins                                      | 73150  | 48    | 324   | 68    |
| 48724 | 51181 | 51197 | Clavaminic synthase-like                              | 32860  | 137   | 1328  | 149   |
| 48724 | 51268 | 51283 | dUTPase-like                                          | 15930  | 3     | 188   | 128   |
| 48724 | 51293 | 51294 | Hedgehog/intein (Hint) domain                         | 2845   | 246   | 58    | 291   |
| 48724 | 51337 | 51338 | Composite domain of metallo-dependent hydrolases      | 10738  | 3266  | 4     | 3267  |
| 51349 | 51350 | 51366 | Ribulose-phosphate binding barrel                     | 55482  | 13    | 112   | 25    |
| 51349 | 51350 | 51395 | FMN-linked oxidoreductases                            | 50703  | 2773  | 4229  | 2806  |
| 51349 | 51350 | 51412 | Inosine monophosphate dehydrogenase (IMPDH)           | 7136   | 854   | 93    | 855   |
| 51349 | 51350 | 51430 | NAD(P)-linked oxidoreductase                          | 32331  | 14    | 1925  | 93    |
| 51349 | 51350 | 51445 | (Trans)glycosidases                                   | 200000 | 1333  | 5204  | 1852  |
| 51349 | 51350 | 51556 | Metallo-dependent hydrolases                          | 100000 | 1080  | 2710  | 1195  |
| 51349 | 51350 | 51569 | Aldolase                                              | 98214  | 50    | 751   | 68    |
| 51349 | 51350 | 51621 | Phosphoenolpyruvate/pyruvate domain                   | 40158  | 1597  | 1081  | 1712  |
| 51349 | 51350 | 51658 | Xylose isomerase-like                                 | 23988  | 484   | 1033  | 485   |
| 51349 | 51350 | 51679 | Bacterial luciferase-like                             | 22089  | 220   | 185   | 290   |
| 51349 | 51350 | 51690 | Nicotinate/Quinolate PRTase C-terminal domain-like    | 15789  | 127   | 99    | 131   |
| 51349 | 51350 | 51695 | PLC-like phosphodiesterases                           | 15637  | 811   | 728   | 836   |
| 51349 | 51734 | 51735 | NAD(P)-binding Rossmann-fold domains                  | 500000 | 695   | 5034  | 1217  |
| 51349 | 51904 | 51905 | FAD/NAD(P)-binding domain                             | 100000 | 39118 | 2883  | 39549 |
| 51349 | 51970 | 51971 | Nucleotide-binding domain                             | 12631  | 526   | 280   | 735   |
| 51349 | 51988 | 51989 | Glycosyl hydrolases family 6, cellulases              | 2620   | 24    | 225   | 60    |
| 51349 | 52046 | 52047 | RNI-like                                              | 4887   | 2     | 269   | 17    |
| 51349 | 52046 | 52058 | L domain-like                                         | 33813  | 82    | 7565  | 347   |
| 51349 | 52095 | 52096 | ClpP/crotonase                                        | 54126  | 643   | 1315  | 667   |
| 51349 | 52120 | 52121 | Lumazine synthase                                     | 5809   | 41    | 202   | 47    |
| 51349 | 52128 | 52129 | Caspase-like                                          | 5523   | 275   | 1385  | 679   |
| 51349 | 52150 | 52151 | FabD/lysophospholipase-like                           | 8265   | 381   | 6785  | 437   |
| 51349 | 52171 | 52218 | Flavoproteins                                         | 48806  | 112   | 283   | 287   |
| 51349 | 52171 | 52266 | SGNH hydrolase                                        | 30731  | 164   | 73    | 208   |
| 51349 | 52171 | 52283 | Formate/glycerate dehydrogenase catalytic domain-like | 28310  | 268   | 1656  | 277   |
| 51349 | 52171 | 52313 | Ribosomal protein S2                                  | 6818   | 2470  | 1383  | 2777  |
| 51349 | 52171 | 52317 | Class I glutamine amidotransferase-like               | 84154  | 19    | 144   | 44    |
| 51349 | 52334 | 52335 | Methylglyoxal synthase-like                           | 16664  | 21    | 358   | 114   |
| 51349 | 52373 | 52374 | Nucleotidyl transferase                               | 99969  | 8093  | 8395  | 8350  |
| 51349 | 52373 | 52402 | Adenine nucleotide alpha hydrolases-like              | 86310  | 402   | 279   | 474   |
| 51349 | 52439 | 52440 | PreATP-grasp domain                                   | 44211  | 164   | 53    | 188   |
| 51349 | 52466 | 52467 | DHS-like NAD/FAD-binding domain                       | 43920  | 718   | 1509  | 812   |
| 51349 | 52498 | 52499 | Isochorismatase-like hydrolases                       | 30084  | 18    | 235   | 46    |
| 51349 | 52517 | 52518 | Thiamin diphosphate-binding fold (THDP-binding)       | 66457  | 6     | 520   | 23    |
| 51349 | 52539 | 52540 | P-loop containing nucleoside triphosphate hydrolases  | 700000 | 12866 | 21753 | 15695 |
| 51349 | 52742 | 52743 | Subtilisin-like                                       | 19994  | 828   | 539   | 867   |
| 51349 | 52767 | 52768 | Arginase/deacetylase                                  | 20491  | 16    | 141   | 23    |
| 51349 | 52776 | 52777 | CoA-dependent acyltransferases                        | 29848  | 62    | 225   | 70    |
| 51349 | 52798 | 52799 | (Phosphotyrosine protein) phosphatases II             | 37820  | 267   | 1082  | 344   |
| 51349 | 52934 | 52943 | ATP synthase (F1-ATPase), gamma subunit               | 6655   | 4     | 336   | 13    |
| 51349 | 52979 | 52980 | Restriction endonuclease-like                         | 23809  | 5     | 241   | 18    |

|       |        |       |                                                                        |        |       |      |       |
|-------|--------|-------|------------------------------------------------------------------------|--------|-------|------|-------|
| 51349 | 53066  | 53067 | Actin-like ATPase domain                                               | 100000 | 76    | 523  | 200   |
| 51349 | 53066  | 53098 | Ribonuclease H-like                                                    | 87336  | 59    | 1705 | 76    |
| 51349 | 53066  | 53137 | Translational machinery components                                     | 13502  | 8     | 506  | 170   |
| 51349 | 53162  | 53167 | Purine and uridine phosphorylases                                      | 27446  | 43    | 613  | 84    |
| 51349 | 53162  | 53187 | Zn-dependent exopeptidases                                             | 65531  | 16265 | 4278 | 16921 |
| 51349 | 53253  | 53254 | Phosphoglycerate mutase-like                                           | 22479  | 31    | 211  | 43    |
| 51349 | 53270  | 53271 | PRTase-like                                                            | 58777  | 205   | 64   | 214   |
| 51349 | 53299  | 53300 | vWA-like                                                               | 23899  | 22    | 283  | 42    |
| 51349 | 53334  | 53335 | S-adenosyl-L-methionine-dependent methyltransferases                   | 200000 | 454   | 2964 | 675   |
| 51349 | 53382  | 53383 | PLP-dependent transferases                                             | 200000 | 4829  | 4827 | 4865  |
| 51349 | 53447  | 53448 | Nucleotide-diphospho-sugar transferases                                | 66877  | 258   | 633  | 288   |
| 51349 | 53473  | 53474 | alpha/beta-Hydrolases                                                  | 100000 | 693   | 1380 | 782   |
| 51349 | 53612  | 53613 | Ribokinase-like                                                        | 43195  | 18    | 236  | 34    |
| 51349 | 53648  | 53649 | Alkaline phosphatase-like                                              | 23205  | 3543  | 225  | 3546  |
| 51349 | 53658  | 53659 | Isocitrate/Isopropylmalate dehydrogenase-like                          | 37932  | 115   | 1747 | 117   |
| 51349 | 53670  | 53671 | Aspartate/ornithine carbamoyltransferase                               | 20038  | 7     | 181  | 62    |
| 51349 | 53685  | 53686 | Tryptophan synthase beta subunit-like PLP-dependent enzymes            | 28976  | 65    | 176  | 98    |
| 51349 | 53696  | 53697 | SIS domain                                                             | 25589  | 0     | 212  | 5     |
| 51349 | 53731  | 53732 | Aconitase iron-sulfur domain                                           | 14131  | 850   | 1242 | 851   |
| 51349 | 53755  | 53756 | UDP-Glycosyltransferase/glycogen phosphorylase                         | 33769  | 50    | 459  | 88    |
| 51349 | 53783  | 53784 | Phosphofructokinase                                                    | 10736  | 50    | 2574 | 61    |
| 51349 | 53799  | 53807 | Helical backbone metal receptor                                        | 30627  | 238   | 803  | 377   |
| 51349 | 53821  | 53822 | Periplasmic binding protein-like I                                     | 44197  | 303   | 1030 | 316   |
| 51349 | 53849  | 53850 | Periplasmic binding protein-like II                                    | 200000 | 6083  | 200  | 6104  |
| 51349 | 53900  | 53901 | Thiolase-like                                                          | 46678  | 215   | 1617 | 270   |
| 51349 | 53926  | 53927 | Cytidine deaminase-like                                                | 30896  | 42    | 191  | 97    |
| 53931 | 54000  | 54001 | Cysteine proteinases                                                   | 46943  | 973   | 3598 | 1216  |
| 48724 | 50036  | 54160 | Chromo domain-like                                                     | 9047   | 32    | 266  | 42    |
| 53931 | 54196  | 54197 | HIT-like                                                               | 25573  | 26    | 140  | 43    |
| 53931 | 54210  | 54211 | Ribosomal protein S5 domain 2-like                                     | 100000 | 25    | 672  | 94    |
| 53931 | 54494  | 54495 | UBC-like                                                               | 24481  | 18    | 183  | 51    |
| 53931 | 54528  | 54529 | Mitochondrial glycoprotein MAM33-like                                  | 552    | 3     | 137  | 14    |
| 53931 | 54592  | 54593 | Glyoxalase/Bleomycin resistance protein/Dihydroxybiphenyl dioxygenase  | 61184  | 22    | 215  | 62    |
| 53931 | 54630  | 54631 | CBS-domain pair                                                        | 38306  | 86    | 206  | 198   |
| 53931 | 54694  | 54695 | POZ domain                                                             | 14517  | 443   | 234  | 459   |
| 53931 | 54712  | 54713 | Elongation factor Ts (EF-Ts), dimerisation domain                      | 7911   | 5     | 228  | 24    |
| 53931 | 54790  | 54791 | Eukaryotic type KH-domain (KH-domain type I)                           | 23938  | 2     | 488  | 15    |
| 53931 | 54842  | 54843 | Ribosomal protein L22                                                  | 6646   | 0     | 304  | 1     |
| 53931 | 54848  | 54849 | GroEL-intermediate domain like                                         | 708    | 124   | 4    | 126   |
| 53931 | 54861  | 54862 | 4Fe-4S ferredoxins                                                     | 55310  | 178   | 319  | 233   |
| 53931 | 54861  | 54928 | RNA-binding domain, RBD                                                | 90213  | 116   | 234  | 137   |
| 53931 | 100877 | 55120 | Pseudouridine synthase                                                 | 28501  | 350   | 2371 | 365   |
| 53931 | 55165  | 55166 | Hedgehog/DD-peptidase                                                  | 6183   | 0     | 562  | 2     |
| 53931 | 55247  | 55257 | RBPI1-like subunits of RNA polymerase                                  | 2775   | 261   | 28   | 264   |
| 53931 | 55346  | 55347 | Glyceraldehyde-3-phosphate dehydrogenase-like, C-terminal domain       | 56969  | 4     | 953  | 335   |
| 53931 | 55423  | 55424 | FAD/NAD-linked reductases, dimerisation (C-terminal) domain            | 37694  | 0     | 317  | 8     |
| 53931 | 55485  | 55486 | Metalloproteases ("zincins"), catalytic domain                         | 55043  | 224   | 1059 | 272   |
| 53931 | 55680  | 55681 | Class II aaRS and biotin synthetases                                   | 85386  | 3010  | 1303 | 3234  |
| 53931 | 55728  | 55729 | Acyl-CoA N-acyltransferases (Nat)                                      | 100000 | 281   | 346  | 318   |
| 53931 | 55769  | 55781 | GAF domain-like                                                        | 21258  | 4     | 137  | 66    |
| 53931 | 55803  | 55804 | Phosphotransferase/anion transport protein                             | 16188  | 15    | 166  | 16    |
| 53931 | 55815  | 55816 | 5'-nucleotidase (syn. UDP-sugar hydrolase), C-terminal domain          | 7009   | 52    | 153  | 77    |
| 53931 | 55830  | 55831 | Thymidylate synthase/dCMP hydroxymethylase                             | 5735   | 16    | 106  | 17    |
| 53931 | 55873  | 55874 | ATPase domain of HSP90 chaperone/DNA topoisomerase II/histidine kinase | 64445  | 215   | 4367 | 316   |
| 53931 | 55919  | 55920 | Creatinase/aminopeptidase                                              | 19532  | 3     | 172  | 13    |

|       |       |       |                                                                          |        |      |      |      |
|-------|-------|-------|--------------------------------------------------------------------------|--------|------|------|------|
| 53931 | 56002 | 56003 | Molybdenum cofactor-binding domain                                       | 12554  | 94   | 363  | 97   |
| 53931 | 56013 | 56014 | Nitrite and sulphite reductase 4Fe-4S domain-like                        | 10652  | 334  | 717  | 341  |
| 53931 | 56041 | 56042 | PurM C-terminal domain-like                                              | 29399  | 0    | 414  | 3    |
| 53931 | 56058 | 56059 | Glutathione synthetase ATP-binding domain-like                           | 78679  | 1942 | 367  | 1958 |
| 53931 | 56103 | 56104 | SAICAR synthase-like                                                     | 11765  | 22   | 111  | 24   |
| 53931 | 56111 | 56112 | Protein kinase-like (PK-like)                                            | 100000 | 1061 | 3237 | 1932 |
| 53931 | 56218 | 56219 | DNase I-like                                                             | 31507  | 533  | 527  | 695  |
| 53931 | 56234 | 56235 | N-terminal nucleophile aminohydrolases (Ntn hydrolases)                  | 69250  | 838  | 3278 | 1049 |
| 53931 | 56275 | 56276 | S-adenosylmethionine decarboxylase                                       | 3217   | 62   | 128  | 63   |
| 53931 | 56280 | 56281 | Metallo-hydrolase/oxidoreductase                                         | 58954  | 849  | 3373 | 1009 |
| 53931 | 56299 | 56300 | Metallo-dependent phosphatases                                           | 49712  | 34   | 249  | 51   |
| 53931 | 56316 | 56317 | Carbon-nitrogen hydrolase                                                | 10726  | 9    | 149  | 50   |
| 53931 | 56321 | 56322 | ADC synthase                                                             | 13593  | 727  | 5200 | 1148 |
| 53931 | 56326 | 56327 | LDH C-terminal domain-like                                               | 20461  | 66   | 152  | 108  |
| 53931 | 56419 | 56420 | Peptide deformylase                                                      | 9313   | 17   | 382  | 51   |
| 53931 | 56435 | 56436 | C-type lectin-like                                                       | 31099  | 63   | 559  | 129  |
| 53931 | 56501 | 56502 | gp120 core                                                               | 4994   | 0    | 4957 | 1    |
| 53931 | 56533 | 56534 | Aromatic aminoacid monooxygenases, catalytic and oligomerization domains | 4073   | 254  | 244  | 258  |
| 53931 | 56541 | 56542 | Substrate-binding domain of HMG-CoA reductase                            | 2868   | 2509 | 556  | 2510 |
| 56572 | 56654 | 56655 | Carbohydrate phosphatase                                                 | 21399  | 3    | 230  | 91   |
| 56572 | 56671 | 56672 | DNA/RNA polymerases                                                      | 40060  | 595  | 393  | 649  |
| 56572 | 56711 | 56712 | Prokaryotic type I DNA topoisomerase                                     | 11153  | 847  | 926  | 849  |
| 56572 | 56718 | 56719 | Type II DNA topoisomerase                                                | 6527   | 820  | 526  | 821  |
| 56572 | 56761 | 56762 | HydB/Nqo4-like                                                           | 8303   | 123  | 638  | 124  |
| 56572 | 56769 | 56770 | HydA/Nqo6-like                                                           | 8362   | 11   | 441  | 31   |
| 51349 | 56783 | 56784 | HAD-like                                                                 | 100000 | 110  | 1058 | 261  |
| 56572 | 56800 | 56801 | Acetyl-CoA synthetase-like                                               | 39939  | 367  | 835  | 531  |
| 56572 | 56814 | 56815 | Sec1/munc18-like (SM) proteins                                           | 3087   | 76   | 181  | 79   |
| 56835 | 56924 | 56925 | OMPA-like                                                                | 7364   | 1    | 164  | 61   |
| 56835 | 56924 | 56931 | Outer membrane phospholipase A (OMPLA)                                   | 2905   | 4    | 406  | 5    |
| 56835 | 56924 | 56935 | Porins                                                                   | 29682  | 10   | 230  | 25   |
| 56835 | 56967 | 56968 | Lipovitellin-phosvitin complex; beta-sheet shell regions                 | 578    | 7    | 112  | 11   |
| 56992 | 56993 | 56994 | Insulin-like                                                             | 1348   | 165  | 143  | 173  |
| 56992 | 57769 | 57798 | Casein kinase II beta subunit                                            | 1627   | 9    | 156  | 11   |
| 56992 | 57902 | 57903 | FYVE/PHD zinc finger                                                     | 30442  | 2    | 355  | 6    |
| 53931 | 63410 | 63411 | LuxS/MPP-like metallohydrolase                                           | 33281  | 71   | 154  | 100  |
| 48724 | 50036 | 63748 | Tudor/PWWP/MBT                                                           | 16111  | 0    | 146  | 28   |
| 48724 | 50938 | 63825 | YWTD domain                                                              | 5075   | 14   | 161  | 20   |
| 48724 | 63886 | 63887 | P-domain of calnexin/calreticulin                                        | 2511   | 0    | 163  | 1    |
| 51349 | 51350 | 63892 | Pyridoxine 5'-phosphate synthase                                         | 4992   | 1    | 216  | 2    |
| 51349 | 64181 | 64182 | DHH phosphoesterases                                                     | 9069   | 406  | 22   | 407  |
| 53931 | 64287 | 64288 | Chorismate lyase-like                                                    | 26262  | 0    | 143  | 59   |
| 53931 | 55769 | 64356 | SNARE-like                                                               | 9542   | 60   | 337  | 94   |
| 56572 | 64483 | 64484 | beta and beta-prime subunits of DNA dependent RNA-polymerase             | 10444  | 1781 | 228  | 1790 |
| 46456 | 47363 | 69012 | alpha-ketoacid dehydrogenase kinase, N-terminal domain                   | 2585   | 315  | 70   | 326  |
| 48724 | 48725 | 69179 | Integrin domains                                                         | 1271   | 157  | 281  | 161  |
| 48724 | 51125 | 69336 | Alpha subunit of glutamate synthase, C-terminal domain                   | 11999  | 1    | 268  | 192  |
| 48724 | 69359 | 69360 | Cell wall binding repeat                                                 | 5215   | 0    | 1087 | 39   |
| 51349 | 69571 | 69572 | Activating enzymes of the ubiquitin-like proteins                        | 15902  | 302  | 49   | 311  |
| 53931 | 69704 | 69705 | Transcription factor NusA, N-terminal domain                             | 6731   | 5    | 432  | 170  |
| 48724 | 49993 | 74650 | Galactose mutarotase-like                                                | 29513  | 8    | 153  | 24   |
| 51349 | 75216 | 75217 | alpha/beta knot                                                          | 37376  | 91   | 187  | 105  |
| 51349 | 75303 | 75304 | Amidase signature (AS) enzymes                                           | 19575  | 12   | 807  | 22   |
| 56572 | 75631 | 75632 | Cullin homology domain                                                   | 4413   | 40   | 119  | 47   |
| 48724 | 48725 | 81296 | E set domains                                                            | 75728  | 13   | 434  | 29   |



|       |        |        |                                                                                 |       |      |      |      |
|-------|--------|--------|---------------------------------------------------------------------------------|-------|------|------|------|
| 53931 | 81302  | 81301  | Nucleotidyltransferase                                                          | 41539 | 88   | 262  | 147  |
| 56835 | 81337  | 81336  | F1F0 ATP synthase subunit A                                                     | 2014  | 2    | 1760 | 8    |
| 53931 | 81607  | 81606  | PP2C-like                                                                       | 9873  | 225  | 166  | 232  |
| 46456 | 48370  | 81901  | HCP-like                                                                        | 5673  | 10   | 586  | 33   |
| 48724 | 49379  | 81995  | beta-sandwich domain of Sec23/24                                                | 2470  | 2170 | 1    | 2171 |
| 48724 | 50352  | 82109  | MIR domain                                                                      | 3740  | 27   | 695  | 29   |
| 48724 | 50412  | 82114  | Riboflavin kinase-like                                                          | 7988  | 34   | 119  | 37   |
| 48724 | 51268  | 82199  | SET domain                                                                      | 6673  | 32   | 168  | 39   |
| 51349 | 82543  | 82544  | GckA/TuD-like                                                                   | 2961  | 166  | 48   | 167  |
| 53931 | 54861  | 82693  | Multidrug efflux transporter AcrB pore domain; PN1, PN2, PC1 and PC2 subdomains | 7369  | 2300 | 91   | 2331 |
| 48724 | 88632  | 88633  | Positive stranded ssRNA viruses                                                 | 15700 | 1718 | 279  | 1769 |
| 51349 | 51988  | 88713  | Glycoside hydrolase/deacetylase                                                 | 27734 | 5    | 164  | 51   |
| 51349 | 88722  | 88723  | PIN domain-like                                                                 | 27483 | 658  | 83   | 676  |
| 46456 | 88945  | 88946  | Sigma2 domain of RNA polymerase sigma factors                                   | 15595 | 131  | 665  | 144  |
| 51349 | 89795  | 89796  | CoA-transferase family III (CaiB/BaiF)                                          | 12338 | 5    | 100  | 39   |
| 56835 | 90122  | 90123  | ABC transporter transmembrane region                                            | 8518  | 2    | 415  | 45   |
| 51349 | 100949 | 100950 | NagB/RpiA/CoA transferase-like                                                  | 58283 | 22   | 891  | 127  |
| 46456 | 101446 | 101447 | Formin homology 2 domain (FH2 domain)                                           | 6770  | 11   | 687  | 196  |
| 48724 | 50614  | 101821 | Aminopeptidase/glucanase lid domain                                             | 3704  | 10   | 396  | 106  |
| 48724 | 50938  | 101898 | NHL repeat                                                                      | 2734  | 2    | 117  | 13   |
| 48724 | 50938  | 101904 | GyrA/ParC C-terminal domain-like                                                | 7996  | 276  | 678  | 321  |
| 48724 | 51160  | 101967 | Adhesin YadA, collagen-binding domain                                           | 4243  | 10   | 178  | 39   |
| 51349 | 102704 | 102705 | NIF3 (NGG1p interacting factor 3)-like                                          | 9137  | 1448 | 29   | 1459 |
| 53931 | 102885 | 102886 | Coproporphyrinogen III oxidase                                                  | 5144  | 7    | 325  | 11   |
| 53931 | 103262 | 103263 | Chorismate synthase, AroC                                                       | 9090  | 124  | 1730 | 683  |
| 56835 | 103490 | 103491 | Preprotein translocase SecY subunit                                             | 1271  | 771  | 219  | 772  |
| 46456 | 109603 | 109604 | HD-domain/PDEase-like                                                           | 33545 | 534  | 890  | 936  |
| 46456 | 47161  | 109775 | Mannose-6-phosphate receptor binding protein 1 (Tip47), C-terminal domain       | 1020  | 24   | 670  | 27   |
| 46456 | 110018 | 110019 | ERO1-like                                                                       | 995   | 118  | 423  | 119  |
| 56572 | 111336 | 111337 | QueA-like                                                                       | 3053  | 763  | 2290 | 764  |
| 56835 | 111351 | 111352 | Ammonium transporter                                                            | 5003  | 4    | 131  | 5    |
| 56992 | 111417 | 111418 | Hormone receptor domain                                                         | 1703  | 1    | 233  | 53   |
| 46456 | 47161  | 116878 | TrmE connector domain                                                           | 2173  | 193  | 5    | 195  |
| 48724 | 117142 | 117143 | Flagellar hook protein flgE                                                     | 3810  | 59   | 344  | 65   |
| 48724 | 50938  | 117281 | Kelch motif                                                                     | 1891  | 0    | 262  | 1    |
| 51349 | 51350  | 117396 | TM1631-like                                                                     | 4328  | 147  | 774  | 227  |
| 56572 | 118195 | 118196 | YaeB-like                                                                       | 1676  | 1    | 1606 | 2    |
| 46456 | 140923 | 140924 | Duffy binding domain-like                                                       | 2532  | 87   | 539  | 215  |
| 46456 | 140958 | 140959 | Indolic compounds 2,3-dioxygenase-like                                          | 4114  | 63   | 104  | 78   |
| 48724 | 48725  | 141072 | CalX-like                                                                       | 4726  | 43   | 123  | 50   |
| 48724 | 50036  | 141255 | YccV-like                                                                       | 306   | 0    | 184  | 1    |
| 48724 | 51125  | 141571 | Pentapeptide repeat-like                                                        | 6094  | 7    | 468  | 29   |
| 53931 | 143080 | 143081 | BB1717-like                                                                     | 6802  | 7    | 134  | 9    |
| 53931 | 143112 | 143113 | NAP-like                                                                        | 3438  | 88   | 131  | 115  |
| 53931 | 143974 | 143975 | IlvD/EDD N-terminal domain-like                                                 | 10140 | 5    | 4789 | 74   |
| 56835 | 81334  | 144083 | Magnesium transport protein CorA, transmembrane region                          | 329   | 0    | 100  | 37   |
| 46456 | 47363  | 158430 | Bacillus cereus metalloprotein-like                                             | 1018  | 69   | 126  | 104  |
| 56572 | 161007 | 161008 | Viral glycoprotein ectodomain-like                                              | 1388  | 85   | 102  | 86   |
| 56835 | 161069 | 161070 | SNF-like                                                                        | 3767  | 7    | 109  | 8    |
